# Supplementary material for: Forest structure dependency analysis of L-band SAR backscatter
Source: PeerJ journal article supplement (doi:10.7717/peerj.10055), 2020-09-30
Supplement: Rawdata-revised.zip [file Rawdata-revised.zip]

## Sheet: Sheet1
yu_bi_du	you_shi_sz	pingjunxiongj	pingjungao	pjxj	hh0207	hv0807	hh0622	hv0922	hh0807	hv622922	hh0922	hv922807	hh1223	hh12230207	hh622807	hh622922	hh922807
0.2	10	10	8	6	-22	-15	-15	-16	-12	0.2	-12	0.3	-22	0.5	0.2	0.3	0.3
0.2	10	10	9	7	-17	-14	-12	-17	-11	0.1	-11	0.4	-16	0.3	0.1	0.1	0.5
0.2	10	4	4	2	-16	-16	-13	-18	-10	0.3	-13	0.4	-16	0.6	0.3	0.4	0.6
0.2	10	4	4	2	-16	-16	-13	-18	-10	0.3	-13	0.4	-16	0.6	0.3	0.4	0.6
0.2	10	4	4	2	-16	-16	-13	-18	-10	0.3	-13	0.4	-16	0.6	0.3	0.4	0.6
0.2	10	4	4	2	-16	-16	-13	-18	-10	0.3	-13	0.4	-16	0.6	0.3	0.4	0.6
0.2	10	10	10	9	-20	-18	-19	-23	-15	0.2	-18	0.2	-20	0.4	0.3	0.3	0.3
0.2	10	10	10	9	-20	-18	-19	-23	-15	0.2	-18	0.2	-20	0.4	0.3	0.3	0.3
0.2	10	10	9	7	-17	-18	-13	-19	-14	0.3	-14	0.4	-17	0.7	0.5	0.5	0.6
0.2	10	6	8	12	-17	-20	-12	-22	-12	0.5	-13	0.5	-17	0.7	0.8	0.8	0.8
0.2	10	10	8	6	-14	-18	-15	-20	-10	0.2	-14	0.2	-14	0.7	0.2	0.3	0.5
0.2	10	2	4	4	-15	-15	-11	-15	-11	0.2	-10	0.4	-15	0.6	0.3	0.3	0.5
0.2	10	12	12	22	-15	-16	-11	-16	-11	0.4	-11	0.4	-15	0.7	0.5	0.5	0.6
0.2	10	10	11	20	-22	-25	-20	-26	-19	0.2	-19	0.4	-22	0.4	0.5	0.4	0.6
0.2	10	10	9	7	-18	-15	-13	-19	-12	0.4	-14	0.2	-18	0.6	0.3	0.5	0.3
0.2	10	10	9	7	-18	-15	-13	-19	-12	0.4	-14	0.2	-18	0.6	0.3	0.5	0.3
0.2	10	8	8	6	-16	-15	-11	-16	-12	0.3	-12	0.5	-15	0.6	0.4	0.4	0.6
0.2	10	2	3	2	-22	-18	-16	-20	-13	0.1	-15	0.2	-17	0.5	0.1	0.2	0.3
0.2	10	12	12	11	-15	-16	-12	-17	-13	0.4	-12	0.5	-15	0.7	0.5	0.6	0.5
0.2	10	8	9	14	-22	-25	-22	-26	-20	0.1	-20	0.2	-22	0.6	0.2	0.2	0.2
0.2	10	10	9	14	-18	-20	-18	-21	-16	0.2	-16	0.4	-18	0.7	0.3	0.3	0.5
0.2	10	7	8	6	-14	-13	-10	-13	-10	0.2	-10	0.6	-15	0.6	0.2	0.3	0.6
0.2	10	6	6	4	-19	-16	-16	-19	-13	0.3	-16	0.2	-19	0.5	0.2	0.3	0.3
0.2	10	6	6	4	-19	-16	-16	-19	-13	0.3	-16	0.2	-19	0.5	0.2	0.3	0.3
0.2	10	10	9	7	-17	-18	-14	-19	-14	0.2	-15	0.5	-17	0.5	0.3	0.3	0.6
0.2	10	6	5	3	-18	-18	-18	-22	-13	0.2	-16	0.2	-18	0.6	0.2	0.3	0.4
0.2	10	4	3	2	-10	-23	-8	-24	-8	0.2	-8	0.4	-10	0.9	0.3	0.2	0.8
0.2	10	6	5	6	-18	-19	-14	-19	-15	0.2	-15	0.5	-18	0.5	0.2	0.3	0.6
0.2	10	12	13	25	-15	-13	-11	-14	-12	0.2	-11	0.4	-15	0.5	0.3	0.3	0.5
0.2	10	2	3	2	-17	-19	-16	-22	-13	0.2	-16	0.3	-18	0.6	0.3	0.2	0.5
0.2	10	10	9	7	-19	-16	-16	-21	-14	0.2	-17	0.3	-20	0.4	0.2	0.3	0.4
0.2	10	8	8	6	-15	-14	-10	-15	-10	0.2	-10	0.3	-16	0.6	0.3	0.2	0.4
0.2	10	10	10	9	-16	-15	-10	-16	-11	0.2	-10	0.6	-15	0.4	0.3	0.3	0.7
0.2	10	8	7	5	-18	-18	-16	-19	-14	0.3	-15	0.4	-18	0.6	0.3	0.4	0.5
0.2	10	6	6	4	-16	-14	-11	-15	-12	0.3	-11	0.4	-15	0.5	0.4	0.4	0.5
0.2	10	6	7	10	-19	-18	-18	-23	-15	0.2	-18	0.3	-19	0.7	0.3	0.3	0.4
0.2	10	10	10	17	-16	-17	-13	-18	-13	0.3	-13	0.5	-16	0.6	0.4	0.4	0.6
0.2	10	8	7	5	-17	-14	-11	-17	-12	0.2	-13	0.2	-17	0.5	0.2	0.3	0.2
0.2	10	2	4	2	-12	-16	-9	-20	-4	0.3	-8	0.5	-11	0.8	0.6	0.5	0.7
0.2	10	8	11	20	-16	-16	-11	-17	-12	0.4	-12	0.4	-15	0.7	0.5	0.5	0.6
0.2	10	10	9	14	-21	-20	-15	-21	-16	0.4	-17	0.4	-21	0.6	0.4	0.4	0.5
0.2	10	8	8	12	-17	-17	-12	-18	-14	0.3	-14	0.5	-17	0.7	0.4	0.4	0.6
0.2	10	6	7	5	-18	-19	-15	-22	-13	0.2	-16	0.3	-17	0.6	0.3	0.3	0.4
0.2	10	10	9	7	-18	-16	-14	-18	-13	0.2	-14	0.3	-19	0.4	0.2	0.2	0.4
0.2	10	6	7	5	-16	-13	-11	-15	-12	0.3	-11	0.4	-15	0.6	0.5	0.4	0.5
0.2	10	6	10	9	-16	-16	-13	-19	-12	0.2	-14	0.4	-16	0.7	0.4	0.3	0.5
0.2	10	6	8	6	-15	-14	-11	-15	-12	0.3	-11	0.4	-15	0.6	0.4	0.3	0.5
0.2	10	6	7	5	-16	-16	-13	-18	-13	0.2	-14	0.3	-16	0.5	0.3	0.3	0.5
0.2	10	8	8	12	-19	-21	-18	-22	-16	0.3	-17	0.4	-19	0.7	0.4	0.3	0.5
0.2	10	4	5	6	-17	-17	-13	-22	-10	0.3	-14	0.2	-17	0.7	0.1	0.3	0.3
0.2	10	6	7	5	-15	-15	-11	-19	-8	0.3	-11	0.4	-15	0.7	0.4	0.4	0.7
0.2	10	8	9	7	-17	-18	-16	-18	-13	0.3	-14	0.4	-16	0.7	0.3	0.3	0.5
0.2	10	6	10	17	-17	-19	-15	-21	-15	0.2	-15	0.3	-17	0.6	0.3	0.3	0.5
0.2	10	8	8	6	-16	-16	-13	-17	-14	0.2	-14	0.4	-16	0.6	0.3	0.3	0.5
0.2	10	8	11	20	-20	-19	-17	-22	-16	0.3	-16	0.3	-19	0.6	0.3	0.3	0.5
0.2	10	10	9	14	-18	-16	-13	-16	-13	0.3	-13	0.4	-18	0.5	0.4	0.4	0.5
0.2	10	8	12	22	-16	-15	-11	-16	-12	0.3	-12	0.5	-16	0.6	0.4	0.4	0.6
0.2	10	8	7	5	-17	-15	-15	-20	-11	0.2	-15	0.3	-17	0.6	0.2	0.3	0.4
0.2	10	12	12	11	-16	-16	-11	-17	-12	0.2	-12	0.3	-16	0.5	0.4	0.4	0.4
0.2	10	8	10	17	-16	-16	-13	-17	-12	0.3	-12	0.5	-16	0.6	0.4	0.4	0.6
0.2	10	12	9	7	-20	-18	-18	-22	-16	0.1	-18	0.3	-20	0.5	0.2	0.2	0.3
0.2	10	12	14	28	-17	-15	-12	-17	-13	0.3	-13	0.4	-17	0.6	0.2	0.4	0.4
0.2	10	8	8	12	-17	-16	-13	-20	-10	0.3	-14	0.3	-17	0.6	0.3	0.4	0.4
0.2	10	4	9	14	-16	-15	-12	-15	-13	0.2	-12	0.4	-16	0.6	0.4	0.4	0.5
0.2	10	8	8	6	-16	-14	-12	-15	-12	0.3	-12	0.3	-16	0.5	0.3	0.4	0.4
0.2	10	10	11	20	-17	-17	-13	-18	-14	0.3	-13	0.4	-17	0.6	0.4	0.4	0.5
0.2	10	10	10	17	-19	-16	-13	-18	-13	0.3	-14	0.3	-16	0.6	0.4	0.4	0.5
0.2	10	10	10	17	-14	-16	-11	-16	-13	0.4	-11	0.4	-15	0.7	0.4	0.5	0.5
0.2	10	12	12	11	-17	-17	-14	-19	-11	0.2	-14	0.4	-16	0.6	0.3	0.3	0.5
0.2	10	8	8	6	-19	-17	-17	-20	-16	0.2	-17	0.4	-20	0.6	0.2	0.2	0.4
0.2	10	6	5	3	-17	-17	-14	-17	-14	0.2	-14	0.5	-17	0.6	0.3	0.3	0.6
0.2	10	10	12	22	-17	-15	-12	-17	-13	0.3	-13	0.3	-17	0.6	0.2	0.4	0.2
0.2	10	12	12	22	-17	-15	-13	-17	-12	0.3	-13	0.4	-17	0.6	0.3	0.4	0.5
0.2	10	2	4	2	-16	-15	-12	-16	-11	0.2	-11	0.2	-16	0.5	0.2	0.3	0.3
0.2	10	6	6	8	-20	-24	-19	-24	-19	0.2	-19	0.3	-20	0.6	0.2	0.2	0.3
0.2	10	2	3	3	-18	-20	-14	-21	-15	0.2	-15	0.3	-18	0.6	0.2	0.3	0.5
0.2	10	6	6	4	-19	-18	-19	-23	-15	0.2	-18	0.3	-19	0.5	0.2	0.2	0.4
0.2	10	8	7	5	-16	-15	-13	-17	-12	0.4	-13	0.3	-16	0.6	0.3	0.4	0.3
0.2	10	8	8	6	-19	-19	-17	-21	-16	0.3	-17	0.4	-19	0.6	0.4	0.4	0.5
0.2	10	8	9	7	-17	-17	-12	-19	-12	0.2	-13	0.4	-17	0.6	0.3	0.3	0.5
0.2	10	2	3	2	-16	-14	-12	-16	-12	0.3	-13	0.3	-16	0.5	0.2	0.4	0.3
0.2	10	2	3	2	-16	-14	-12	-16	-12	0.3	-13	0.3	-16	0.5	0.2	0.4	0.3
0.2	10	2	3	2	-16	-14	-12	-16	-12	0.3	-13	0.3	-16	0.5	0.2	0.4	0.3
0.2	10	12	12	11	-15	-17	-11	-17	-11	0.3	-11	0.4	-15	0.6	0.4	0.4	0.6
0.3	10	5	7	10	-14	-15	-10	-14	-12	0.5	-10	0.5	-14	0.7	0.6	0.5	0.4
0.3	10	3	3	2	-17	-16	-11	-18	-12	0.3	-13	0.4	-17	0.7	0.4	0.5	0.5
0.3	10	16	13	28	-17	-20	-14	-21	-14	0.2	-15	0.4	-17	0.7	0.3	0.3	0.6
0.3	10	10	10	17	-16	-12	-11	-14	-11	0.3	-11	0.5	-15	0.5	0.4	0.3	0.5
0.3	10	4	4	4	-15	-13	-10	-15	-9	0.2	-10	0.2	-15	0.5	0.2	0.3	0.2
0.3	10	8	7	10	-17	-15	-12	-16	-13	0.2	-13	0.4	-17	0.6	0.3	0.3	0.4
0.3	10	8	7	10	-17	-15	-12	-16	-13	0.2	-13	0.4	-17	0.6	0.3	0.3	0.4
0.3	10	8	7	10	-17	-15	-12	-16	-13	0.2	-13	0.4	-17	0.6	0.3	0.3	0.4
0.3	10	16	13	25	-15	-13	-10	-14	-11	0.3	-11	0.6	-15	0.7	0.3	0.3	0.6
0.3	10	8	10	26	-15	-20	-12	-21	-13	0.4	-13	0.6	-16	0.8	0.6	0.6	0.8
0.3	10	8	8	18	-18	-19	-16	-20	-16	0.3	-16	0.4	-18	0.7	0.4	0.4	0.5
0.3	10	4	5	9	-18	-18	-18	-18	-13	0.3	-14	0.4	-18	0.7	0.3	0.3	0.4
0.3	10	2	4	4	-16	-16	-13	-17	-13	0.3	-13	0.5	-17	0.7	0.3	0.4	0.6
0.3	10	6	6	8	-14	-14	-10	-16	-11	0.4	-11	0.4	-15	0.5	0.4	0.4	0.5
0.3	10	12	12	22	-16	-16	-12	-16	-12	0.2	-11	0.4	-16	0.5	0.4	0.3	0.5
0.3	10	7	8	12	-15	-14	-11	-14	-11	0.3	-12	0.6	-15	0.5	0.3	0.4	0.6
0.3	10	12	13	25	-18	-16	-13	-19	-12	0.2	-13	0.2	-18	0.7	0.2	0.3	0.4
0.3	10	6	8	12	-16	-14	-12	-15	-12	0.4	-13	0.4	-16	0.6	0.4	0.4	0.4
0.3	10	14	14	42	-15	-14	-11	-14	-11	0.2	-11	0.4	-16	0.5	0.4	0.2	0.4
0.3	10	8	9	21	-15	-17	-11	-18	-12	0.4	-13	0.5	-15	0.7	0.5	0.5	0.6
0.3	10	7	8	12	-16	-15	-11	-14	-12	0.4	-12	0.4	-15	0.6	0.4	0.3	0.4
0.3	10	10	8	12	-15	-16	-11	-16	-12	0.3	-12	0.4	-15	0.7	0.4	0.5	0.6
0.3	10	8	9	14	-19	-20	-18	-23	-16	0.2	-17	0.3	-19	0.7	0.3	0.3	0.4
0.3	10	4	4	4	-17	-17	-13	-18	-13	0.2	-13	0.4	-17	0.6	0.3	0.3	0.4
0.3	10	11	13	25	-16	-15	-11	-15	-13	0.2	-12	0.4	-16	0.6	0.3	0.3	0.4
0.3	10	13	11	20	-15	-14	-11	-15	-12	0.3	-12	0.4	-15	0.6	0.5	0.4	0.4
0.3	10	12	10	17	-17	-19	-13	-20	-15	0.3	-14	0.4	-17	0.7	0.5	0.5	0.6
0.3	10	8	9	14	-15	-13	-11	-14	-11	0.2	-11	0.5	-15	0.6	0.2	0.3	0.6
0.3	10	8	8	12	-15	-13	-10	-15	-10	0.3	-10	0.4	-16	0.4	0.3	0.4	0.5
0.3	10	12	11	20	-15	-12	-11	-13	-10	0.3	-11	0.4	-15	0.6	0.1	0.3	0.4
0.3	10	9	9	14	-15	-13	-11	-14	-11	0.4	-12	0.6	-15	0.6	0.3	0.4	0.6
0.3	10	6	6	12	-19	-20	-17	-22	-15	0.2	-16	0.3	-19	0.4	0.2	0.2	0.5
0.3	10	6	5	9	-16	-20	-13	-20	-14	0.3	-14	0.3	-16	0.6	0.3	0.3	0.5
0.3	10	6	6	8	-17	-14	-13	-16	-12	0.3	-13	0.2	-17	0.6	0.2	0.3	0.2
0.3	10	8	7	10	-16	-18	-12	-19	-13	0.4	-13	0.5	-16	0.6	0.5	0.5	0.7
0.3	10	8	7	10	-14	-14	-11	-14	-11	0.4	-11	0.5	-14	0.7	0.6	0.5	0.5
0.3	10	8	11	30	-15	-14	-11	-16	-12	0.2	-12	0.4	-15	0.5	0.3	0.3	0.5
0.3	10	8	8	12	-20	-18	-20	-24	-14	0.2	-19	0.2	-20	0.6	0.2	0.3	0.3
0.3	10	8	8	12	-15	-13	-11	-14	-12	0.4	-11	0.3	-15	0.6	0.5	0.4	0.4
0.3	10	10	9	14	-15	-17	-11	-17	-13	0.3	-13	0.4	-15	0.7	0.4	0.4	0.6
0.3	10	3	4	6	-17	-17	-14	-17	-14	0.2	-13	0.5	-17	0.7	0.3	0.2	0.5
0.3	10	10	10	17	-18	-20	-16	-24	-14	0.3	-17	0.3	-18	0.7	0.5	0.4	0.6
0.3	10	8	7	10	-16	-15	-12	-15	-13	0.2	-12	0.4	-16	0.5	0.3	0.3	0.5
0.3	10	18	14	28	-15	-13	-10	-14	-11	0.3	-10	0.4	-15	0.5	0.4	0.4	0.4
0.3	10	6	6	8	-19	-18	-16	-20	-14	0.2	-15	0.3	-19	0.6	0.2	0.3	0.4
0.3	10	9	9	14	-15	-14	-11	-14	-11	0.3	-11	0.5	-15	0.6	0.3	0.4	0.5
0.3	10	6	8	18	-16	-15	-12	-17	-11	0.2	-12	0.4	-15	0.6	0.4	0.3	0.5
0.3	10	8	8	12	-18	-18	-16	-21	-14	0.3	-16	0.4	-18	0.6	0.4	0.4	0.5
0.3	10	8	8	12	-18	-18	-16	-21	-14	0.3	-16	0.4	-18	0.6	0.4	0.4	0.5
0.3	10	3	4	6	-17	-14	-13	-17	-11	0.2	-13	0.2	-17	0.5	0.3	0.3	0.3
0.3	10	10	11	20	-16	-15	-12	-15	-12	0.3	-12	0.5	-17	0.5	0.4	0.4	0.5
0.3	10	10	11	30	-17	-17	-13	-19	-12	0.3	-14	0.4	-17	0.6	0.5	0.4	0.6
0.3	10	6	8	12	-15	-15	-11	-15	-13	0.2	-13	0.3	-16	0.5	0.2	0.2	0.4
0.3	10	4	4	4	-20	-16	-16	-22	-15	0.4	-18	0.4	-20	0.6	0.4	0.4	0.5
0.3	10	6	8	18	-18	-18	-16	-21	-14	0.2	-17	0.3	-18	0.7	0.3	0.2	0.5
0.3	10	3	5	6	-16	-17	-12	-17	-10	0.2	-10	0.4	-16	0.6	0.3	0.2	0.4
0.3	10	12	11	20	-16	-15	-12	-16	-13	0.2	-12	0.3	-16	0.7	0.3	0.3	0.4
0.3	10	2	3	3	-17	-17	-14	-21	-11	0.3	-14	0.3	-17	0.7	0.4	0.5	0.5
0.3	10	3	4	6	-16	-16	-12	-17	-13	0.4	-13	0.4	-16	0.7	0.5	0.5	0.5
0.3	10	4	6	12	-14	-14	-11	-14	-12	0.4	-11	0.5	-14	0.7	0.6	0.4	0.4
0.3	10	6	8	12	-18	-18	-15	-19	-15	0.2	-15	0.4	-18	0.5	0.2	0.3	0.5
0.3	10	8	8	18	-16	-17	-11	-17	-13	0.2	-12	0.4	-16	0.5	0.3	0.3	0.5
0.3	10	9	10	17	-16	-13	-10	-14	-12	0.3	-11	0.5	-16	0.5	0.4	0.3	0.5
0.3	10	8	8	18	-17	-16	-14	-18	-12	0.3	-13	0.3	-17	0.6	0.3	0.4	0.3
0.3	10	5	6	8	-16	-14	-12	-16	-12	0.3	-13	0.2	-17	0.5	0.3	0.3	0.3
0.3	10	6	10	26	-18	-19	-15	-23	-14	0.2	-17	0.3	-18	0.7	0.2	0.2	0.4
0.3	10	6	5	6	-18	-17	-17	-21	-14	0.2	-17	0.3	-18	0.6	0.2	0.3	0.4
0.3	10	12	13	38	-19	-17	-15	-19	-15	0.3	-16	0.4	-19	0.7	0.3	0.4	0.4
0.3	10	10	11	30	-17	-18	-15	-21	-12	0.3	-15	0.4	-17	0.7	0.3	0.3	0.5
0.3	10	6	5	6	-16	-15	-13	-16	-12	0.3	-12	0.3	-16	0.6	0.3	0.3	0.4
0.3	10	8	7	10	-18	-17	-13	-18	-14	0.3	-14	0.4	-17	0.6	0.4	0.4	0.5
0.3	10	12	13	25	-15	-15	-11	-16	-12	0.3	-12	0.3	-15	0.7	0.4	0.5	0.5
0.3	10	3	3	5	-26	-25	-22	-26	-22	0.3	-22	0.4	-25	0.4	0.4	0.4	0.5
0.3	10	10	12	22	-16	-15	-12	-16	-12	0.4	-12	0.3	-17	0.6	0.2	0.4	0.3
0.3	10	6	6	8	-16	-13	-11	-14	-11	0.3	-11	0.2	-16	0.4	0.2	0.4	0.2
0.3	10	6	6	4	-18	-19	-14	-21	-15	0.2	-15	0.4	-18	0.6	0.3	0.3	0.5
0.3	10	6	5	6	-21	-16	-17	-22	-13	0.2	-17	0.2	-20	0.6	0.2	0.3	0.3
0.3	10	10	11	20	-16	-18	-14	-19	-14	0.3	-14	0.4	-17	0.6	0.4	0.4	0.5
0.3	10	10	11	30	-15	-16	-11	-16	-13	0.4	-12	0.4	-14	0.7	0.5	0.5	0.5
0.3	10	10	9	14	-18	-16	-14	-19	-12	0.2	-15	0.3	-18	0.5	0.2	0.3	0.4
0.3	10	12	12	22	-17	-15	-13	-16	-13	0.3	-12	0.4	-18	0.7	0.1	0.4	0.4
0.3	10	4	5	6	-18	-18	-13	-20	-14	0.2	-15	0.4	-18	0.6	0.4	0.3	0.5
0.3	10	8	8	12	-15	-13	-11	-15	-11	0.2	-11	0.4	-15	0.4	0.4	0.3	0.5
0.3	10	6	5	6	-18	-17	-14	-18	-14	0.3	-14	0.4	-18	0.6	0.3	0.3	0.4
0.3	10	2	3	2	-15	-14	-10	-15	-11	0.4	-11	0.5	-15	0.7	0.4	0.5	0.6
0.3	10	14	15	47	-16	-14	-11	-14	-11	0.3	-11	0.5	-16	0.5	0.3	0.4	0.5
0.3	10	12	12	22	-17	-19	-12	-21	-12	0.3	-14	0.3	-17	0.7	0.7	0.5	0.3
0.3	10	8	8	12	-18	-20	-15	-21	-16	0.2	-16	0.3	-18	0.7	0.3	0.3	0.5
0.3	10	8	8	12	-18	-20	-15	-21	-16	0.2	-16	0.3	-18	0.7	0.3	0.3	0.5
0.3	10	2	3	3	-18	-18	-14	-20	-14	0.2	-14	0.5	-17	0.7	0.3	0.3	0.6
0.3	10	8	11	20	-14	-17	-10	-18	-12	0.3	-11	0.4	-14	0.7	0.4	0.4	0.7
0.3	10	6	6	8	-18	-17	-15	-18	-15	0.2	-15	0.4	-18	0.6	0.3	0.3	0.5
0.3	10	8	7	10	-17	-15	-13	-18	-13	0.2	-14	0.2	-16	0.6	0.2	0.3	0.2
0.3	10	8	7	10	-17	-15	-13	-18	-13	0.2	-14	0.2	-16	0.6	0.2	0.3	0.2
0.3	10	10	10	17	-18	-16	-15	-19	-13	0.3	-16	0.2	-17	0.6	0.3	0.3	0.2
0.3	10	10	10	17	-18	-20	-20	-25	-16	0.1	-20	0.2	-18	0.7	0.1	0.2	0.3
0.3	10	2	4	4	-18	-16	-13	-17	-15	0.3	-14	0.4	-18	0.6	0.4	0.4	0.5
0.3	10	3	3	2	-16	-14	-10	-14	-11	0.6	-11	0.5	-16	0.7	0.8	0.7	0.6
0.4	10	10	10	26	-16	-15	-11	-16	-12	0.3	-12	0.4	-16	0.6	0.4	0.4	0.6
0.4	10	8	10	26	-16	-15	-12	-17	-11	0.3	-13	0.3	-16	0.5	0.2	0.4	0.4
0.4	10	8	10	26	-16	-15	-12	-17	-11	0.3	-13	0.3	-16	0.5	0.2	0.4	0.4
0.4	10	8	10	26	-16	-15	-12	-17	-11	0.3	-13	0.3	-16	0.5	0.2	0.4	0.4
0.4	10	8	8	18	-16	-16	-11	-17	-11	0.2	-11	0.4	-16	0.4	0.4	0.3	0.5
0.4	10	10	11	30	-15	-13	-10	-13	-11	0.2	-10	0.3	-15	0.6	0.2	0.2	0.4
0.4	10	14	12	33	-15	-14	-10	-14	-11	0.1	-10	0.2	-15	0.3	0.2	0.2	0.2
0.4	10	6	7	15	-16	-13	-12	-15	-11	0.3	-12	0.2	-16	0.6	0.2	0.3	0.2
0.4	10	10	12	33	-15	-13	-10	-14	-11	0.3	-11	0.4	-15	0.6	0.4	0.3	0.4
0.4	10	11	12	33	-15	-14	-11	-15	-12	0.3	-12	0.6	-15	0.6	0.3	0.3	0.6
0.4	10	13	13	38	-15	-14	-11	-14	-11	0.2	-11	0.4	-15	0.4	0.4	0.3	0.5
0.4	10	10	10	26	-15	-14	-11	-15	-12	0.4	-12	0.4	-15	0.6	0.4	0.4	0.4
0.4	10	6	9	28	-21	-21	-19	-24	-19	0.2	-20	0.2	-20	0.5	0.2	0.2	0.3
0.4	10	8	7	15	-20	-18	-18	-25	-16	0.2	-20	0.2	-20	0.6	0.2	0.2	0.3
0.4	10	12	11	30	-17	-18	-12	-20	-14	0.2	-14	0.3	-17	0.4	0.3	0.3	0.5
0.4	10	10	10	35	-18	-19	-15	-19	-15	0.2	-15	0.4	-18	0.7	0.3	0.3	0.5
0.4	10	10	9	21	-16	-16	-13	-18	-12	0.3	-13	0.4	-17	0.5	0.3	0.4	0.5
0.4	10	10	12	44	-16	-14	-12	-16	-9	0.2	-11	0.3	-16	0.5	0.2	0.3	0.4
0.4	10	8	8	18	-16	-14	-11	-14	-12	0.4	-12	0.4	-16	0.6	0.5	0.4	0.4
0.4	10	6	8	18	-15	-13	-10	-14	-11	0.3	-11	0.4	-16	0.5	0.4	0.3	0.4
0.4	10	10	11	30	-16	-14	-12	-15	-12	0.2	-12	0.4	-16	0.5	0.3	0.3	0.5
0.4	10	16	16	51	-16	-13	-11	-13	-11	0.3	-11	0.4	-16	0.4	0.4	0.3	0.4
0.4	10	6	6	12	-17	-15	-13	-17	-12	0.4	-14	0.4	-17	0.6	0.4	0.4	0.3
0.4	10	4	4	6	-19	-14	-18	-19	-12	0.2	-16	0.3	-20	0.4	0.2	0.2	0.3
0.4	10	6	6	12	-18	-20	-17	-22	-16	0.2	-16	0.4	-18	0.7	0.2	0.2	0.5
0.4	10	6	6	12	-18	-20	-17	-22	-16	0.2	-16	0.4	-18	0.7	0.2	0.2	0.5
0.4	10	12	12	33	-15	-14	-11	-14	-11	0.3	-10	0.4	-15	0.5	0.4	0.4	0.4
0.4	10	12	13	38	-15	-13	-11	-15	-11	0.3	-11	0.3	-16	0.6	0.3	0.4	0.3
0.4	10	8	9	21	-15	-13	-11	-14	-11	0.3	-11	0.5	-15	0.6	0.2	0.3	0.6
0.4	10	12	12	44	-16	-15	-11	-16	-12	0.3	-12	0.4	-16	0.6	0.4	0.4	0.5
0.4	10	6	6	12	-19	-15	-16	-19	-13	0.2	-16	0.3	-19	0.7	0.2	0.2	0.3
0.4	10	12	11	30	-17	-14	-11	-17	-12	0.3	-12	0.2	-16	0.6	0.3	0.5	0.2
0.4	10	8	8	18	-19	-16	-16	-21	-14	0.2	-17	0.3	-19	0.5	0.3	0.3	0.3
0.4	10	10	10	26	-16	-16	-12	-18	-13	0.2	-14	0.4	-17	0.6	0.3	0.3	0.5
0.4	10	10	12	33	-15	-14	-10	-14	-12	0.3	-11	0.4	-15	0.6	0.4	0.3	0.4
0.4	10	6	5	12	-19	-22	-17	-22	-17	0.2	-17	0.4	-19	0.7	0.3	0.3	0.5
0.4	10	6	6	12	-20	-20	-19	-22	-16	0.2	-16	0.4	-20	0.7	0.3	0.2	0.5
0.4	10	16	15	47	-15	-13	-11	-14	-12	0.3	-11	0.4	-15	0.5	0.4	0.3	0.5
0.4	10	12	14	42	-15	-16	-11	-18	-11	0.2	-12	0.3	-15	0.7	0.4	0.3	0.4
0.4	10	8	9	21	-17	-19	-14	-20	-14	0.3	-14	0.4	-17	0.7	0.4	0.4	0.6
0.4	10	12	12	33	-17	-17	-13	-18	-14	0.3	-13	0.4	-18	0.6	0.4	0.4	0.5
0.4	10	10	9	21	-17	-13	-13	-16	-11	0.4	-13	0.3	-18	0.7	0.2	0.4	0.2
0.4	10	2	3	5	-17	-17	-12	-20	-13	0.3	-14	0.4	-16	0.7	0.5	0.5	0.5
0.4	10	8	10	35	-21	-19	-16	-22	-16	0.2	-19	0.2	-21	0.6	0.3	0.3	0.3
0.4	10	7	8	18	-16	-14	-11	-14	-12	0.3	-11	0.5	-16	0.6	0.4	0.3	0.4
0.4	10	8	7	15	-17	-14	-15	-17	-12	0.2	-14	0.2	-17	0.6	0.2	0.3	0.2
0.4	10	8	7	20	-16	-17	-12	-16	-14	0.3	-13	0.4	-16	0.6	0.3	0.4	0.4
0.4	10	8	8	24	-16	-22	-13	-21	-13	0.2	-12	0.3	-16	0.7	0.3	0.3	0.6
0.4	10	8	8	18	-18	-19	-15	-21	-15	0.2	-16	0.4	-17	0.7	0.3	0.3	0.5
0.4	10	8	9	21	-17	-20	-16	-21	-16	0.2	-15	0.4	-17	0.7	0.3	0.3	0.6
0.4	10	11	10	26	-18	-20	-14	-21	-15	0.2	-16	0.2	-18	0.5	0.2	0.2	0.4
0.4	10	8	8	18	-17	-17	-13	-19	-13	0.2	-13	0.3	-17	0.6	0.3	0.3	0.5
0.4	10	7	8	18	-15	-13	-11	-14	-11	0.3	-11	0.6	-15	0.6	0.2	0.3	0.6
0.4	10	8	8	18	-16	-14	-11	-15	-11	0.2	-10	0.2	-16	0.5	0.2	0.3	0.2
0.4	10	8	8	18	-16	-17	-10	-20	-12	0.3	-14	0.4	-16	0.7	0.5	0.4	0.6
0.4	10	8	8	18	-16	-13	-11	-14	-10	0.3	-12	0.2	-15	0.4	0.2	0.3	0.2
0.4	10	4	4	8	-16	-14	-12	-16	-11	0.3	-12	0.3	-16	0.5	0.3	0.4	0.3
0.4	10	8	10	26	-21	-19	-19	-23	-17	0.2	-19	0.2	-21	0.6	0.2	0.2	0.3
0.4	10	8	8	24	-16	-15	-11	-15	-13	0.3	-12	0.4	-14	0.7	0.3	0.4	0.5
0.4	10	12	11	30	-16	-14	-11	-15	-12	0.2	-11	0.3	-16	0.3	0.3	0.2	0.3
0.4	10	6	6	12	-16	-19	-17	-22	-14	0.2	-17	0.3	-16	0.7	0.2	0.4	0.4
0.4	10	6	5	9	-17	-15	-15	-18	-11	0.2	-13	0.3	-17	0.7	0.2	0.3	0.4
0.4	10	8	8	18	-17	-14	-13	-16	-12	0.2	-12	0.2	-17	0.6	0.2	0.3	0.3
0.4	10	8	9	28	-17	-17	-13	-17	-13	0.3	-13	0.5	-16	0.6	0.3	0.3	0.5
0.4	10	10	11	30	-18	-18	-17	-20	-15	0.3	-16	0.4	-18	0.7	0.4	0.3	0.4
0.4	10	8	9	21	-16	-16	-12	-16	-13	0.3	-13	0.4	-16	0.6	0.5	0.4	0.5
0.4	10	2	4	6	-17	-21	-17	-24	-15	0.3	-17	0.4	-17	0.7	0.3	0.3	0.5
0.4	10	8	8	18	-16	-15	-18	-15	-12	0.2	-11	0.4	-16	0.4	0.3	0.3	0.5
0.4	10	6	7	15	-16	-17	-13	-18	-13	0.2	-13	0.3	-16	0.4	0.2	0.2	0.5
0.4	10	10	10	35	-15	-15	-10	-15	-10	0.3	-9	0.4	-15	0.6	0.4	0.3	0.6
0.4	10	6	6	12	-16	-17	-13	-17	-14	0.3	-13	0.5	-16	0.7	0.3	0.4	0.6
0.4	10	16	15	62	-15	-13	-10	-13	-11	0.3	-10	0.4	-15	0.4	0.2	0.4	0.4
0.4	10	4	4	6	-16	-16	-12	-18	-11	0.2	-12	0.3	-16	0.5	0.3	0.3	0.4
0.4	10	10	10	26	-15	-15	-10	-16	-10	0.4	-11	0.4	-15	0.7	0.5	0.5	0.5
0.4	10	6	6	12	-16	-14	-12	-16	-10	0.2	-13	0.2	-16	0.6	0.2	0.3	0.2
0.4	10	6	5	9	-17	-18	-14	-19	-14	0.2	-14	0.4	-17	0.5	0.3	0.3	0.6
0.4	10	7	8	18	-16	-14	-11	-16	-12	0.3	-13	0.4	-16	0.6	0.5	0.4	0.4
0.4	10	8	8	18	-19	-17	-18	-21	-15	0.2	-17	0.3	-19	0.5	0.2	0.2	0.4
0.4	10	8	7	20	-19	-19	-15	-21	-16	0.2	-16	0.2	-18	0.5	0.3	0.3	0.3
0.4	10	13	12	33	-16	-14	-12	-15	-12	0.3	-12	0.4	-16	0.5	0.5	0.4	0.5
0.4	10	6	10	35	-16	-15	-12	-16	-13	0.3	-13	0.4	-16	0.6	0.4	0.4	0.5
0.4	10	8	7	15	-15	-14	-14	-17	-10	0.2	-12	0.2	-15	0.7	0.2	0.3	0.3
0.4	10	10	11	30	-18	-20	-15	-20	-16	0.3	-15	0.4	-18	0.7	0.3	0.3	0.5
0.4	10	10	10	26	-18	-21	-16	-24	-14	0.1	-17	0.3	-18	0.7	0.2	0.2	0.5
0.4	10	8	9	28	-18	-17	-14	-19	-14	0.3	-15	0.5	-18	0.6	0.4	0.3	0.6
0.4	10	8	12	44	-16	-16	-12	-18	-12	0.2	-13	0.4	-16	0.6	0.4	0.3	0.6
0.4	10	8	10	35	-20	-20	-17	-22	-17	0.3	-19	0.4	-20	0.5	0.3	0.3	0.5
0.4	10	8	9	21	-20	-21	-18	-24	-16	0.2	-19	0.3	-20	0.7	0.2	0.2	0.3
0.4	10	6	9	28	-15	-15	-11	-15	-12	0.3	-11	0.4	-15	0.7	0.4	0.4	0.5
0.4	10	14	13	38	-16	-14	-11	-15	-12	0.2	-12	0.4	-15	0.5	0.4	0.3	0.3
0.4	10	10	12	44	-19	-26	-18	-26	-21	0.2	-18	0.2	-19	0.8	0.4	0.2	0.2
0.4	10	8	10	26	-15	-17	-11	-18	-13	0.3	-13	0.4	-15	0.7	0.4	0.5	0.6
0.4	10	8	8	18	-16	-16	-11	-16	-11	0.3	-10	0.7	-16	0.7	0.5	0.4	0.8
0.4	10	6	9	28	-17	-15	-12	-16	-13	0.3	-13	0.4	-17	0.6	0.4	0.4	0.5
0.4	10	10	11	30	-15	-14	-11	-14	-11	0.4	-11	0.5	-15	0.6	0.5	0.4	0.5
0.4	10	8	7	15	-17	-20	-16	-20	-15	0.2	-15	0.4	-17	0.7	0.3	0.3	0.6
0.4	10	10	10	26	-16	-14	-11	-16	-11	0.3	-12	0.2	-16	0.6	0.3	0.4	0.3
0.4	10	10	11	30	-18	-17	-14	-19	-14	0.2	-14	0.4	-18	0.7	0.3	0.3	0.5
0.4	10	8	9	21	-14	-15	-11	-16	-10	0.2	-10	0.4	-14	0.7	0.4	0.3	0.6
0.4	10	16	14	42	-15	-14	-11	-14	-12	0.4	-11	0.6	-15	0.6	0.4	0.3	0.6
0.4	10	4	3	5	-16	-15	-10	-16	-11	0.4	-10	0.6	-16	0.6	0.5	0.5	0.7
0.4	10	3	5	12	-19	-20	-18	-23	-15	0.2	-18	0.3	-19	0.6	0.2	0.2	0.3
0.4	10	2	3	5	-17	-15	-11	-16	-12	0.4	-12	0.5	-17	0.6	0.6	0.5	0.5
0.4	10	8	7	15	-17	-14	-13	-16	-11	0.3	-13	0.3	-17	0.5	0.2	0.3	0.3
0.4	10	10	10	26	-16	-17	-13	-19	-12	0.2	-12	0.4	-16	0.7	0.3	0.3	0.5
0.4	10	2	3	5	-17	-17	-14	-18	-14	0.2	-14	0.5	-17	0.7	0.4	0.3	0.6
0.4	10	10	10	26	-14	-15	-11	-15	-12	0.2	-12	0.4	-14	0.6	0.3	0.3	0.5
0.4	10	4	4	6	-20	-24	-19	-25	-19	0.2	-21	0.2	-20	0.5	0.2	0.3	0.5
0.4	10	4	4	6	-20	-24	-19	-25	-19	0.2	-21	0.2	-20	0.5	0.2	0.3	0.5
0.4	10	10	10	26	-18	-17	-18	-22	-12	0.2	-16	0.3	-20	0.5	0.2	0.3	0.4
0.4	10	6	8	18	-17	-20	-16	-21	-15	0.3	-16	0.4	-17	0.6	0.3	0.3	0.5
0.4	10	10	11	30	-15	-16	-11	-17	-12	0.4	-12	0.4	-15	0.7	0.5	0.5	0.6
0.4	10	12	12	33	-15	-14	-12	-15	-12	0.2	-12	0.3	-15	0.5	0.3	0.3	0.4
0.4	10	10	10	26	-16	-15	-11	-16	-13	0.4	-12	0.5	-16	0.7	0.6	0.5	0.5
0.4	10	8	9	21	-17	-17	-14	-18	-14	0.3	-14	0.5	-17	0.6	0.4	0.4	0.6
0.4	10	8	8	18	-16	-15	-13	-17	-12	0.4	-13	0.3	-16	0.6	0.3	0.4	0.3
0.4	10	8	8	18	-16	-15	-13	-17	-12	0.4	-13	0.3	-16	0.6	0.3	0.4	0.3
0.4	10	8	7	15	-16	-16	-11	-19	-11	0.3	-13	0.2	-15	0.3	0.3	0.4	0.5
0.4	10	8	7	15	-16	-15	-12	-18	-11	0.3	-13	0.2	-16	0.6	0.2	0.4	0.4
0.4	10	8	8	18	-17	-17	-16	-19	-14	0.2	-15	0.3	-17	0.6	0.2	0.2	0.3
0.4	10	8	9	21	-16	-15	-15	-16	-13	0.2	-13	0.4	-16	0.3	0.3	0.3	0.5
0.4	10	8	7	15	-16	-15	-13	-17	-12	0.4	-13	0.3	-16	0.6	0.3	0.4	0.3
0.4	10	8	8	18	-16	-15	-13	-16	-13	0.3	-12	0.3	-17	0.5	0.3	0.4	0.3
0.4	10	8	7	15	-18	-13	-11	-14	-10	0.3	-11	0.2	-17	0.5	0.2	0.4	0.2
0.4	10	6	6	12	-18	-14	-12	-17	-12	0.2	-13	0.2	-18	0.6	0.2	0.3	0.3
0.5	10	10	11	40	-17	-17	-13	-18	-12	0.3	-13	0.6	-16	0.7	0.4	0.4	0.6
0.5	10	10	11	40	-17	-17	-13	-18	-12	0.3	-13	0.6	-16	0.7	0.4	0.4	0.6
0.5	10	6	8	24	-18	-15	-15	-18	-11	0.2	-14	0.2	-18	0.6	0.2	0.3	0.3
0.5	10	10	10	35	-15	-16	-11	-19	-10	0.4	-12	0.3	-16	0.6	0.5	0.6	0.5
0.5	10	10	10	35	-15	-15	-11	-16	-12	0.4	-11	0.4	-15	0.7	0.2	0.5	0.4
0.5	10	10	9	28	-16	-16	-11	-16	-11	0.2	-11	0.4	-16	0.4	0.2	0.2	0.5
0.5	10	8	8	24	-16	-16	-11	-16	-12	0.3	-11	0.4	-15	0.6	0.4	0.4	0.5
0.5	10	8	9	28	-15	-14	-11	-14	-12	0.4	-11	0.5	-15	0.6	0.5	0.4	0.5
0.5	10	11	12	44	-15	-13	-10	-13	-11	0.2	-10	0.5	-15	0.5	0.2	0.2	0.6
0.5	10	11	12	44	-15	-14	-11	-14	-12	0.3	-11	0.4	-15	0.6	0.4	0.3	0.4
0.5	10	14	13	50	-15	-14	-11	-15	-12	0.4	-12	0.5	-15	0.6	0.4	0.4	0.5
0.5	10	10	10	35	-18	-16	-12	-17	-14	0.4	-14	0.6	-18	0.6	0.5	0.5	0.6
0.5	10	6	7	20	-17	-18	-12	-19	-14	0.1	-13	0.3	-18	0.5	0.2	0.2	0.4
0.5	10	10	10	35	-16	-15	-13	-17	-12	0.3	-13	0.3	-17	0.5	0.3	0.3	0.3
0.5	10	6	8	30	-17	-18	-12	-18	-14	0.2	-12	0.3	-16	0.5	0.3	0.3	0.5
0.5	10	10	12	56	-17	-16	-14	-18	-13	0.2	-14	0.4	-17	0.6	0.4	0.3	0.4
0.5	10	8	8	24	-16	-16	-13	-18	-11	0.3	-13	0.4	-16	0.6	0.4	0.4	0.6
0.5	10	10	11	50	-15	-14	-11	-15	-12	0.2	-12	0.4	-15	0.6	0.3	0.4	0.5
0.5	10	10	10	35	-14	-12	-10	-13	-10	0.2	-10	0.6	-15	0.5	0.2	0.2	0.6
0.5	10	10	11	40	-15	-13	-10	-13	-11	0.2	-11	0.6	-15	0.6	0.2	0.3	0.6
0.5	10	10	12	44	-14	-13	-10	-13	-11	0.2	-10	0.5	-15	0.6	0.3	0.2	0.5
0.5	10	6	7	25	-17	-17	-11	-17	-13	0.3	-12	0.5	-17	0.6	0.4	0.4	0.6
0.5	10	12	10	35	-14	-14	-11	-14	-11	0.5	-11	0.5	-14	0.6	0.6	0.6	0.6
0.5	10	8	10	35	-15	-14	-11	-14	-12	0.2	-11	0.5	-15	0.5	0.2	0.2	0.5
0.5	10	10	10	35	-17	-15	-13	-17	-12	0.2	-13	0.2	-17	0.6	0.2	0.3	0.3
0.5	10	10	10	35	-17	-15	-13	-17	-12	0.2	-13	0.2	-17	0.6	0.2	0.3	0.3
0.5	10	10	11	40	-15	-14	-11	-14	-12	0.2	-12	0.4	-15	0.5	0.2	0.3	0.4
0.5	10	6	11	50	-15	-19	-15	-22	-11	0.2	-14	0.3	-16	0.6	0.3	0.3	0.6
0.5	10	8	12	56	-17	-16	-13	-18	-13	0.2	-14	0.3	-17	0.6	0.3	0.3	0.5
0.5	10	7	8	24	-15	-14	-11	-15	-12	0.4	-12	0.6	-15	0.7	0.4	0.5	0.6
0.5	10	11	13	50	-16	-14	-11	-14	-12	0.3	-12	0.4	-16	0.6	0.4	0.3	0.4
0.5	10	16	15	62	-15	-13	-10	-13	-10	0.4	-10	0.5	-15	0.6	0.3	0.4	0.5
0.5	10	6	10	44	-19	-18	-17	-24	-13	0.2	-17	0.3	-19	0.7	0.2	0.2	0.5
0.5	10	8	8	30	-17	-18	-13	-19	-15	0.3	-13	0.4	-16	0.5	0.3	0.4	0.5
0.5	10	10	12	56	-15	-14	-11	-15	-12	0.2	-11	0.5	-15	0.6	0.3	0.3	0.6
0.5	10	8	8	30	-17	-17	-14	-19	-13	0.3	-14	0.4	-17	0.6	0.3	0.4	0.5
0.5	10	12	11	40	-15	-14	-11	-14	-12	0.4	-12	0.6	-15	0.6	0.3	0.4	0.6
0.5	10	9	10	35	-15	-12	-10	-13	-10	0.2	-10	0.5	-15	0.5	0.2	0.2	0.5
0.5	10	11	13	50	-15	-14	-11	-14	-12	0.3	-11	0.4	-15	0.6	0.4	0.3	0.4
0.5	10	14	14	56	-15	-13	-10	-13	-11	0.2	-10	0.4	-15	0.6	0.2	0.2	0.4
0.5	10	11	12	44	-14	-13	-10	-13	-11	0.3	-11	0.7	-15	0.6	0.3	0.3	0.6
0.5	10	8	10	35	-16	-17	-12	-17	-13	0.3	-12	0.5	-16	0.6	0.4	0.4	0.6
0.5	10	11	12	44	-14	-13	-11	-14	-11	0.2	-11	0.4	-15	0.5	0.3	0.3	0.5
0.5	10	12	13	50	-15	-14	-11	-14	-12	0.3	-11	0.4	-15	0.6	0.4	0.2	0.4
0.5	10	12	12	44	-21	-16	-17	-23	-14	0.2	-18	0.2	-21	0.6	0.2	0.2	0.3
0.5	10	10	11	40	-20	-19	-19	-23	-13	0.1	-18	0.2	-20	0.6	0.1	0.2	0.3
0.5	10	10	12	44	-15	-13	-11	-14	-12	0.4	-12	0.4	-15	0.6	0.5	0.3	0.4
0.5	10	6	10	44	-19	-19	-17	-22	-14	0.2	-17	0.3	-19	0.5	0.2	0.2	0.4
0.5	10	8	9	28	-15	-15	-10	-15	-12	0.3	-11	0.5	-14	0.6	0.5	0.5	0.6
0.5	10	6	6	16	-15	-13	-11	-15	-11	0.3	-11	0.2	-14	0.6	0.3	0.4	0.3
0.5	10	6	7	20	-16	-16	-15	-19	-11	0.2	-13	0.3	-16	0.6	0.3	0.3	0.4
0.5	10	14	14	56	-15	-14	-11	-15	-12	0.3	-11	0.3	-15	0.6	0.4	0.4	0.4
0.5	10	13	12	44	-16	-14	-11	-14	-11	0.3	-11	0.4	-15	0.5	0.4	0.4	0.4
0.5	10	13	12	44	-16	-13	-11	-13	-11	0.3	-11	0.4	-15	0.4	0.4	0.4	0.4
0.5	10	8	10	35	-15	-15	-11	-15	-12	0.3	-11	0.4	-15	0.6	0.5	0.3	0.4
0.5	10	10	12	44	-15	-14	-11	-14	-12	0.3	-11	0.5	-15	0.6	0.5	0.3	0.4
0.5	10	11	12	44	-14	-13	-11	-13	-11	0.2	-10	0.5	-15	0.6	0.3	0.3	0.6
0.5	10	8	8	24	-15	-14	-11	-15	-12	0.4	-12	0.4	-15	0.7	0.5	0.4	0.4
0.5	10	10	9	28	-18	-18	-15	-19	-15	0.3	-15	0.5	-17	0.7	0.4	0.4	0.5
0.5	10	8	8	30	-17	-18	-12	-19	-14	0.3	-13	0.3	-16	0.7	0.4	0.5	0.5
0.5	10	6	9	35	-16	-17	-11	-18	-12	0.3	-12	0.3	-16	0.6	0.4	0.4	0.5
0.5	10	14	13	50	-14	-14	-11	-14	-11	0.2	-11	0.4	-15	0.6	0.3	0.3	0.5
0.5	10	10	11	50	-16	-17	-12	-18	-13	0.2	-13	0.3	-16	0.7	0.3	0.3	0.5
0.5	10	14	13	50	-15	-13	-11	-14	-10	0.3	-11	0.3	-15	0.6	0.2	0.3	0.3
0.5	10	8	9	28	-17	-17	-14	-18	-14	0.2	-14	0.4	-17	0.6	0.3	0.3	0.5
0.5	10	12	12	44	-15	-14	-11	-14	-12	0.3	-12	0.4	-15	0.6	0.4	0.4	0.4
0.5	10	11	12	44	-15	-13	-10	-13	-11	0.3	-11	0.6	-15	0.5	0.2	0.3	0.6
0.5	10	10	10	35	-15	-14	-10	-14	-11	0.3	-11	0.6	-15	0.7	0.3	0.4	0.6
0.5	10	13	12	44	-15	-13	-10	-14	-11	0.3	-11	0.6	-15	0.6	0.3	0.3	0.6
0.5	10	11	10	35	-15	-14	-11	-15	-12	0.4	-11	0.6	-15	0.7	0.4	0.5	0.6
0.5	10	6	7	25	-17	-17	-15	-22	-13	0.2	-17	0.3	-18	0.7	0.2	0.2	0.4
0.5	10	8	10	35	-23	-23	-20	-25	-18	0.3	-20	0.3	-23	0.5	0.3	0.4	0.5
0.5	10	10	12	44	-15	-16	-11	-17	-12	0.3	-12	0.4	-15	0.7	0.4	0.4	0.5
0.5	10	12	11	40	-15	-13	-11	-13	-11	0.3	-11	0.6	-15	0.6	0.2	0.3	0.6
0.5	10	10	10	35	-17	-15	-13	-15	-13	0.2	-13	0.4	-17	0.5	0.2	0.2	0.4
0.5	10	14	14	56	-15	-15	-11	-15	-12	0.3	-12	0.4	-14	0.7	0.4	0.4	0.5
0.5	10	14	14	56	-15	-13	-11	-14	-11	0.3	-11	0.4	-16	0.5	0.4	0.4	0.4
0.5	10	12	12	44	-15	-14	-11	-15	-12	0.3	-11	0.6	-15	0.7	0.3	0.4	0.6
0.5	10	6	7	20	-20	-15	-16	-17	-12	0.2	-14	0.2	-20	0.6	0.2	0.2	0.3
0.5	10	8	9	28	-29	-31	-23	-34	-23	0.2	-27	0.4	-29	0.6	0.3	0.2	0.5
0.5	10	6	9	35	-16	-15	-12	-16	-12	0.2	-12	0.3	-15	0.6	0.4	0.3	0.4
0.5	10	10	12	44	-18	-16	-13	-20	-13	0.2	-15	0.3	-18	0.6	0.4	0.3	0.4
0.5	10	8	8	30	-16	-14	-11	-14	-12	0.2	-12	0.4	-15	0.6	0.3	0.3	0.5
0.5	10	12	12	44	-18	-17	-13	-17	-13	0.3	-13	0.5	-17	0.4	0.3	0.3	0.6
0.5	10	11	12	44	-15	-14	-11	-14	-11	0.3	-11	0.4	-15	0.6	0.4	0.3	0.4
0.5	10	11	13	50	-16	-14	-11	-15	-12	0.4	-12	0.5	-16	0.6	0.5	0.4	0.4
0.5	10	10	9	28	-15	-13	-10	-13	-11	0.2	-11	0.6	-15	0.6	0.2	0.2	0.6
0.5	10	12	12	56	-16	-15	-12	-15	-12	0.3	-12	0.4	-15	0.5	0.3	0.4	0.5
0.5	10	10	10	35	-20	-21	-18	-24	-15	0.1	-18	0.3	-20	0.7	0.2	0.2	0.4
0.5	10	6	11	50	-17	-22	-14	-23	-14	0.2	-14	0.3	-16	0.6	0.3	0.3	0.7
0.5	10	10	10	35	-14	-19	-12	-20	-10	0.2	-13	0.3	-14	0.8	0.3	0.3	0.6
0.5	10	8	10	44	-17	-18	-15	-20	-14	0.2	-16	0.4	-17	0.7	0.3	0.3	0.4
0.5	10	8	9	28	-17	-19	-14	-20	-13	0.2	-14	0.4	-17	0.6	0.2	0.2	0.5
0.5	10	10	12	56	-16	-15	-12	-15	-12	0.2	-12	0.3	-16	0.6	0.3	0.3	0.4
0.5	10	6	7	20	-17	-13	-12	-15	-11	0.2	-12	0.2	-17	0.6	0.2	0.3	0.2
0.5	10	8	10	35	-16	-14	-12	-15	-13	0.3	-12	0.5	-16	0.6	0.4	0.4	0.5
0.5	10	10	10	35	-20	-17	-16	-21	-15	0.2	-17	0.3	-20	0.6	0.3	0.3	0.4
0.5	10	13	12	44	-16	-15	-11	-15	-12	0.2	-12	0.3	-16	0.5	0.4	0.3	0.5
0.5	10	8	9	28	-17	-17	-12	-18	-13	0.3	-12	0.4	-16	0.6	0.4	0.4	0.6
0.5	10	8	8	24	-15	-14	-11	-15	-11	0.3	-11	0.4	-14	0.5	0.4	0.4	0.5
0.5	10	10	11	50	-19	-18	-15	-20	-14	0.2	-15	0.3	-18	0.6	0.3	0.3	0.5
0.5	10	12	12	44	-15	-15	-10	-15	-12	0.3	-11	0.5	-15	0.6	0.4	0.4	0.6
0.5	10	14	13	50	-15	-14	-11	-14	-12	0.4	-12	0.6	-15	0.6	0.4	0.4	0.5
0.5	10	8	11	50	-15	-14	-11	-15	-11	0.2	-11	0.5	-15	0.6	0.4	0.3	0.6
0.5	10	8	10	35	-14	-15	-11	-15	-12	0.3	-11	0.4	-14	0.7	0.4	0.4	0.5
0.5	10	8	8	30	-17	-13	-13	-16	-11	0.2	-13	0.2	-17	0.4	0.2	0.3	0.2
0.5	10	6	7	25	-16	-17	-14	-19	-12	0.2	-13	0.4	-16	0.6	0.3	0.2	0.5
0.5	10	8	9	28	-16	-18	-15	-19	-13	0.2	-13	0.3	-16	0.7	0.4	0.3	0.5
0.5	10	8	8	24	-17	-17	-13	-17	-14	0.3	-13	0.4	-16	0.6	0.4	0.4	0.5
0.5	10	8	9	28	-14	-17	-11	-17	-14	0.4	-11	0.4	-14	0.7	0.4	0.5	0.4
0.5	10	10	12	44	-15	-13	-10	-13	-11	0.3	-11	0.4	-15	0.5	0.4	0.3	0.4
0.5	10	10	8	30	-15	-14	-12	-16	-11	0.2	-12	0.2	-16	0.4	0.2	0.3	0.2
0.5	10	10	11	40	-16	-16	-12	-17	-12	0.3	-12	0.4	-16	0.5	0.4	0.4	0.5
0.5	10	13	12	44	-15	-14	-11	-14	-12	0.3	-12	0.5	-15	0.6	0.4	0.4	0.5
0.5	10	10	10	35	-16	-14	-12	-16	-12	0.2	-12	0.5	-16	0.6	0.4	0.3	0.5
0.5	10	10	10	35	-17	-17	-13	-18	-14	0.3	-14	0.5	-17	0.7	0.3	0.4	0.6
0.5	10	6	8	24	-17	-16	-13	-17	-13	0.2	-13	0.5	-17	0.7	0.4	0.3	0.6
0.5	10	10	10	35	-15	-15	-11	-16	-12	0.2	-11	0.3	-15	0.6	0.4	0.3	0.5
0.5	10	8	9	28	-17	-14	-13	-16	-12	0.3	-14	0.2	-16	0.5	0.2	0.4	0.2
0.5	10	8	10	35	-16	-13	-11	-15	-11	0.3	-12	0.2	-16	0.5	0.2	0.4	0.2
0.5	10	12	13	50	-16	-14	-11	-15	-11	0.3	-11	0.3	-15	0.6	0.3	0.5	0.4
0.5	10	8	12	56	-15	-16	-11	-17	-12	0.2	-12	0.4	-16	0.6	0.4	0.3	0.6
0.5	10	12	11	40	-15	-14	-11	-14	-12	0.3	-11	0.5	-15	0.6	0.4	0.4	0.5
0.5	10	14	12	44	-19	-20	-17	-21	-16	0.2	-17	0.3	-19	0.6	0.4	0.3	0.4
0.5	10	5	5	15	-17	-19	-17	-23	-12	0.2	-16	0.2	-17	0.6	0.2	0.3	0.5
0.5	10	10	10	44	-18	-17	-16	-20	-14	0.3	-16	0.4	-18	0.7	0.4	0.4	0.4
0.5	10	10	10	44	-18	-17	-16	-20	-14	0.3	-16	0.4	-18	0.7	0.4	0.4	0.4
0.5	10	8	8	24	-17	-17	-14	-18	-14	0.3	-14	0.4	-17	0.7	0.5	0.5	0.5
0.5	10	10	12	44	-17	-15	-14	-17	-13	0.3	-14	0.2	-17	0.5	0.2	0.4	0.2
0.5	10	12	13	50	-17	-16	-13	-18	-12	0.2	-13	0.3	-17	0.6	0.3	0.3	0.4
0.5	10	13	13	50	-16	-14	-11	-14	-12	0.3	-11	0.3	-15	0.5	0.4	0.4	0.4
0.5	10	8	7	20	-16	-15	-12	-17	-12	0.2	-13	0.2	-16	0.6	0.3	0.3	0.3
0.5	10	10	9	28	-15	-13	-10	-13	-11	0.4	-11	0.4	-15	0.6	0.4	0.4	0.4
0.5	10	14	13	50	-15	-12	-11	-13	-10	0.3	-11	0.3	-15	0.5	0.1	0.3	0.3
0.5	10	8	9	28	-14	-16	-11	-15	-11	0.2	-11	0.4	-15	0.5	0.3	0.4	0.6
0.5	10	10	10	35	-19	-16	-16	-21	-14	0.2	-16	0.3	-19	0.5	0.2	0.3	0.3
0.5	10	8	7	20	-19	-19	-14	-22	-14	0.3	-16	0.3	-19	0.6	0.4	0.4	0.4
0.5	10	20	14	71	-16	-14	-11	-15	-12	0.3	-12	0.4	-16	0.5	0.3	0.4	0.4
0.5	10	6	9	35	-16	-16	-11	-17	-13	0.3	-12	0.3	-16	0.7	0.5	0.5	0.5
0.5	10	6	6	16	-17	-17	-13	-18	-13	0.3	-13	0.5	-17	0.7	0.4	0.3	0.6
0.5	10	8	8	30	-16	-14	-11	-14	-12	0.3	-11	0.5	-16	0.5	0.3	0.3	0.5
0.5	10	10	12	44	-15	-14	-11	-15	-12	0.3	-12	0.4	-15	0.6	0.4	0.4	0.5
0.5	10	8	10	35	-17	-15	-12	-17	-12	0.2	-14	0.2	-17	0.6	0.2	0.3	0.3
0.5	10	8	10	35	-17	-15	-12	-17	-12	0.2	-14	0.2	-17	0.6	0.2	0.3	0.3
0.5	10	10	10	35	-17	-18	-13	-18	-13	0.3	-13	0.5	-17	0.7	0.4	0.3	0.6
0.5	10	8	10	35	-14	-15	-11	-15	-13	0.3	-10	0.2	-15	0.7	0.3	0.5	0.3
0.5	10	10	10	35	-16	-15	-12	-16	-13	0.2	-12	0.5	-16	0.7	0.3	0.3	0.6
0.5	10	10	11	40	-16	-13	-11	-14	-11	0.3	-11	0.2	-17	0.6	0.3	0.4	0.3
0.5	10	6	8	24	-20	-15	-15	-19	-12	0.3	-15	0.2	-20	0.5	0.2	0.3	0.3
0.5	10	6	8	24	-20	-15	-15	-19	-12	0.3	-15	0.2	-20	0.5	0.2	0.3	0.3
0.5	10	8	9	28	-18	-16	-16	-20	-14	0.4	-17	0.3	-19	0.5	0.3	0.4	0.3
0.5	10	8	9	28	-18	-16	-16	-20	-14	0.4	-17	0.3	-19	0.5	0.3	0.4	0.3
0.5	10	8	8	24	-17	-13	-12	-16	-11	0.3	-14	0.2	-16	0.5	0.2	0.3	0.2
0.5	10	8	8	24	-17	-13	-12	-16	-11	0.3	-14	0.2	-16	0.5	0.2	0.3	0.2
0.5	10	6	8	24	-16	-14	-11	-15	-13	0.3	-12	0.4	-16	0.6	0.3	0.3	0.4
0.5	10	12	11	40	-16	-14	-12	-16	-11	0.3	-13	0.2	-16	0.6	0.3	0.4	0.3
0.5	10	10	11	50	-19	-19	-15	-22	-15	0.2	-17	0.3	-19	0.6	0.2	0.2	0.4
0.5	10	10	12	44	-15	-13	-12	-14	-11	0.3	-12	0.2	-15	0.5	0.3	0.4	0.3
0.5	10	8	9	28	-18	-17	-15	-20	-12	0.3	-15	0.2	-18	0.5	0.2	0.3	0.3
0.5	10	10	10	44	-16	-16	-16	-17	-13	0.3	-12	0.4	-16	0.6	0.2	0.3	0.4
0.5	10	2	4	8	-19	-21	-16	-22	-17	0.3	-17	0.4	-19	0.6	0.3	0.3	0.4
0.5	10	10	10	35	-16	-14	-12	-16	-11	0.2	-13	0.2	-16	0.5	0.2	0.3	0.3
0.5	10	6	7	20	-18	-14	-13	-16	-13	0.3	-13	0.2	-18	0.5	0.2	0.4	0.2
0.5	10	8	8	24	-18	-17	-15	-20	-15	0.3	-17	0.4	-18	0.6	0.2	0.3	0.4
0.5	10	8	8	24	-17	-16	-12	-16	-13	0.4	-13	0.5	-16	0.6	0.4	0.5	0.6
0.5	10	10	10	35	-17	-14	-13	-17	-11	0.2	-13	0.2	-16	0.4	0.2	0.3	0.3
0.6	10	2	3	8	-22	-23	-20	-26	-18	0.2	-21	0.3	-22	0.5	0.2	0.2	0.3
0.6	10	2	3	8	-20	-21	-17	-25	-13	0.1	-19	0.1	-20	0.6	0.2	0.2	0.3
0.6	10	3	3	8	-19	-20	-15	-23	-14	0.3	-17	0.3	-19	0.7	0.4	0.4	0.5
0.6	10	6	6	20	-16	-20	-14	-21	-10	0.3	-13	0.3	-17	0.6	0.3	0.3	0.6
0.6	10	8	7	25	-16	-18	-13	-19	-14	0.3	-13	0.4	-16	0.6	0.4	0.4	0.5
0.6	10	8	7	25	-19	-16	-14	-21	-13	0.3	-15	0.3	-19	0.6	0.4	0.5	0.4
0.6	10	6	7	25	-15	-16	-11	-18	-11	0.1	-11	0.5	-15	0.6	0.3	0.2	0.6
0.6	10	8	7	25	-16	-13	-12	-15	-11	0.3	-12	0.3	-16	0.5	0.3	0.4	0.3
0.6	10	8	7	30	-15	-15	-10	-15	-11	0.2	-10	0.4	-15	0.6	0.3	0.3	0.5
0.6	10	6	8	30	-17	-15	-15	-19	-11	0.2	-14	0.2	-17	0.5	0.2	0.3	0.3
0.6	10	7	8	30	-15	-14	-11	-15	-12	0.3	-12	0.5	-15	0.7	0.5	0.4	0.4
0.6	10	8	8	30	-16	-15	-11	-16	-12	0.3	-12	0.3	-16	0.4	0.3	0.3	0.4
0.6	10	8	8	36	-17	-15	-13	-18	-11	0.3	-14	0.2	-17	0.6	0.2	0.3	0.3
0.6	10	9	8	30	-16	-15	-11	-16	-13	0.3	-12	0.4	-15	0.7	0.5	0.4	0.4
0.6	10	8	8	30	-16	-15	-11	-16	-11	0.4	-12	0.4	-16	0.7	0.5	0.6	0.5
0.6	10	8	8	36	-16	-15	-12	-18	-11	0.2	-13	0.3	-16	0.6	0.2	0.3	0.4
0.6	10	6	8	30	-16	-13	-11	-15	-11	0.2	-12	0.2	-15	0.6	0.2	0.2	0.2
0.6	10	6	8	30	-17	-13	-13	-17	-11	0.2	-13	0.2	-17	0.5	0.2	0.3	0.3
0.6	10	6	8	30	-17	-13	-13	-17	-11	0.2	-13	0.2	-17	0.5	0.2	0.3	0.3
0.6	10	8	9	35	-16	-17	-12	-20	-12	0.3	-14	0.4	-16	0.7	0.4	0.4	0.5
0.6	10	8	9	35	-17	-17	-15	-18	-14	0.4	-14	0.5	-17	0.6	0.6	0.6	0.6
0.6	10	8	9	35	-16	-17	-14	-19	-13	0.4	-13	0.5	-16	0.7	0.6	0.5	0.6
0.6	10	8	9	35	-16	-17	-10	-17	-13	0.4	-11	0.5	-16	0.7	0.5	0.5	0.6
0.6	10	8	9	35	-17	-20	-15	-21	-15	0.3	-15	0.4	-17	0.6	0.3	0.3	0.4
0.6	10	8	9	35	-14	-15	-10	-15	-12	0.3	-11	0.4	-14	0.7	0.5	0.5	0.5
0.6	10	8	9	35	-15	-15	-11	-15	-12	0.3	-11	0.3	-14	0.7	0.5	0.4	0.5
0.6	10	8	9	35	-16	-18	-13	-18	-15	0.3	-14	0.4	-16	0.6	0.4	0.4	0.5
0.6	10	10	9	35	-15	-13	-12	-15	-11	0.2	-11	0.2	-15	0.5	0.2	0.3	0.3
0.6	10	10	9	42	-15	-16	-11	-15	-13	0.3	-11	0.5	-15	0.6	0.4	0.5	0.6
0.6	10	8	9	35	-17	-17	-14	-18	-14	0.3	-14	0.3	-17	0.6	0.4	0.4	0.4
0.6	10	8	9	35	-15	-14	-12	-15	-12	0.4	-12	0.5	-15	0.7	0.5	0.5	0.5
0.6	10	8	9	35	-22	-22	-19	-25	-17	0.2	-20	0.2	-23	0.5	0.2	0.2	0.4
0.6	10	10	9	42	-17	-17	-12	-17	-13	0.3	-12	0.4	-17	0.6	0.4	0.4	0.6
0.6	10	9	10	44	-15	-14	-11	-14	-12	0.3	-11	0.6	-15	0.6	0.3	0.3	0.6
0.6	10	8	10	44	-15	-13	-11	-14	-12	0.4	-11	0.3	-15	0.5	0.4	0.4	0.4
0.6	10	9	10	44	-15	-14	-11	-14	-12	0.4	-11	0.6	-15	0.6	0.5	0.4	0.5
0.6	10	8	10	44	-18	-16	-16	-18	-13	0.2	-14	0.3	-18	0.5	0.2	0.3	0.3
0.6	10	10	10	44	-15	-13	-10	-13	-11	0.2	-11	0.5	-15	0.6	0.2	0.2	0.6
0.6	10	8	10	44	-16	-17	-14	-18	-13	0.2	-13	0.4	-16	0.7	0.3	0.3	0.5
0.6	10	12	10	44	-14	-14	-11	-14	-11	0.3	-11	0.4	-14	0.6	0.4	0.4	0.4
0.6	10	9	10	44	-15	-13	-10	-14	-11	0.2	-11	0.6	-15	0.6	0.2	0.3	0.6
0.6	10	8	10	44	-15	-13	-11	-13	-11	0.3	-11	0.4	-15	0.4	0.4	0.4	0.3
0.6	10	8	10	44	-15	-13	-11	-13	-11	0.3	-11	0.4	-15	0.4	0.4	0.4	0.4
0.6	10	8	10	52	-17	-16	-13	-17	-14	0.3	-13	0.5	-18	0.6	0.4	0.3	0.6
0.6	10	10	10	44	-16	-13	-13	-16	-12	0.3	-13	0.2	-17	0.6	0.3	0.3	0.2
0.6	10	10	10	52	-16	-13	-12	-15	-11	0.3	-12	0.2	-16	0.5	0.2	0.3	0.3
0.6	10	10	10	44	-15	-14	-11	-14	-12	0.3	-11	0.3	-15	0.5	0.3	0.4	0.4
0.6	10	8	10	44	-15	-17	-11	-16	-14	0.4	-11	0.3	-15	0.7	0.4	0.6	0.4
0.6	10	10	10	44	-15	-15	-11	-16	-11	0.2	-11	0.3	-15	0.6	0.3	0.2	0.5
0.6	10	11	11	50	-15	-13	-11	-14	-11	0.3	-11	0.5	-15	0.5	0.2	0.3	0.5
0.6	10	8	11	50	-18	-16	-14	-18	-13	0.3	-14	0.5	-18	0.7	0.4	0.4	0.5
0.6	10	12	11	50	-16	-15	-11	-16	-13	0.4	-12	0.5	-14	0.6	0.5	0.5	0.6
0.6	10	10	11	50	-16	-15	-12	-16	-12	0.4	-12	0.5	-15	0.6	0.5	0.4	0.6
0.6	10	12	11	50	-15	-14	-11	-14	-12	0.4	-12	0.4	-15	0.5	0.4	0.4	0.5
0.6	10	10	11	50	-17	-16	-13	-17	-13	0.4	-13	0.4	-17	0.6	0.5	0.5	0.5
0.6	10	10	11	50	-21	-22	-17	-22	-19	0.3	-17	0.4	-21	0.7	0.4	0.4	0.5
0.6	10	12	11	50	-16	-16	-12	-17	-13	0.3	-12	0.4	-16	0.6	0.4	0.4	0.5
0.6	10	10	11	50	-16	-15	-11	-16	-12	0.2	-12	0.5	-16	0.6	0.4	0.3	0.6
0.6	10	10	11	50	-15	-13	-10	-13	-11	0.2	-11	0.4	-15	0.5	0.4	0.3	0.4
0.6	10	12	11	50	-20	-21	-19	-24	-17	0.2	-19	0.3	-20	0.7	0.2	0.2	0.4
0.6	10	12	11	50	-15	-13	-11	-14	-12	0.4	-11	0.4	-15	0.5	0.4	0.4	0.4
0.6	10	10	11	50	-16	-17	-12	-18	-12	0.2	-12	0.3	-16	0.7	0.4	0.3	0.5
0.6	10	10	11	50	-16	-16	-11	-17	-13	0.3	-13	0.6	-16	0.7	0.4	0.4	0.6
0.6	10	10	11	50	-17	-18	-14	-19	-14	0.3	-15	0.4	-17	0.6	0.4	0.4	0.5
0.6	10	10	11	50	-17	-17	-14	-20	-14	0.2	-14	0.4	-18	0.6	0.3	0.3	0.6
0.6	10	10	12	67	-18	-20	-13	-21	-14	0.3	-13	0.4	-17	0.7	0.5	0.4	0.5
0.6	10	13	12	56	-17	-20	-16	-20	-16	0.2	-17	0.3	-17	0.6	0.2	0.3	0.4
0.6	10	12	12	56	-17	-17	-14	-19	-13	0.2	-14	0.3	-17	0.6	0.3	0.3	0.5
0.6	10	12	12	56	-18	-17	-15	-22	-14	0.2	-16	0.3	-18	0.7	0.4	0.4	0.5
0.6	10	12	12	67	-16	-14	-11	-15	-12	0.2	-11	0.4	-16	0.6	0.3	0.3	0.5
0.6	10	12	12	56	-15	-13	-11	-13	-11	0.2	-10	0.4	-15	0.6	0.2	0.2	0.4
0.6	10	12	12	56	-19	-16	-15	-21	-14	0.2	-16	0.3	-19	0.7	0.2	0.3	0.4
0.6	10	12	12	56	-15	-16	-10	-16	-13	0.2	-11	0.4	-15	0.6	0.4	0.3	0.6
0.6	10	13	12	56	-13	-14	-10	-14	-11	0.5	-10	0.6	-13	0.7	0.6	0.6	0.7
0.6	10	10	12	56	-15	-16	-12	-17	-13	0.4	-13	0.5	-15	0.6	0.4	0.4	0.6
0.6	10	11	12	56	-15	-14	-11	-14	-12	0.4	-12	0.6	-15	0.6	0.5	0.4	0.5
0.6	10	13	12	56	-15	-14	-11	-15	-12	0.4	-12	0.6	-15	0.6	0.4	0.4	0.5
0.6	10	10	12	56	-14	-13	-11	-13	-11	0.2	-11	0.5	-15	0.5	0.3	0.2	0.5
0.6	10	12	12	56	-15	-13	-11	-13	-11	0.2	-10	0.4	-15	0.5	0.3	0.2	0.4
0.6	10	8	12	67	-16	-16	-11	-17	-12	0.3	-12	0.3	-15	0.7	0.5	0.5	0.5
0.6	10	10	12	67	-15	-15	-11	-16	-11	0.2	-12	0.4	-15	0.6	0.3	0.2	0.6
0.6	10	10	12	67	-19	-17	-15	-19	-15	0.2	-16	0.4	-18	0.5	0.3	0.3	0.5
0.6	10	13	12	56	-16	-14	-11	-14	-12	0.3	-11	0.4	-16	0.6	0.4	0.4	0.5
0.6	10	12	12	56	-14	-13	-11	-14	-11	0.3	-11	0.5	-15	0.5	0.2	0.3	0.6
0.6	10	14	12	56	-15	-13	-10	-13	-11	0.3	-11	0.4	-15	0.5	0.5	0.4	0.5
0.6	10	14	12	56	-14	-13	-10	-13	-11	0.4	-10	0.5	-14	0.6	0.6	0.5	0.6
0.6	10	12	12	56	-14	-13	-10	-13	-11	0.4	-10	0.5	-15	0.6	0.5	0.4	0.5
0.6	10	12	12	56	-17	-15	-12	-15	-13	0.3	-12	0.4	-16	0.6	0.5	0.4	0.4
0.6	10	14	12	67	-15	-16	-11	-17	-11	0.2	-11	0.4	-15	0.5	0.3	0.3	0.5
0.6	10	12	12	56	-15	-13	-10	-14	-11	0.4	-11	0.4	-15	0.6	0.5	0.4	0.5
0.6	10	10	12	56	-15	-19	-12	-20	-13	0.3	-13	0.4	-15	0.7	0.4	0.4	0.6
0.6	10	12	12	56	-15	-14	-11	-14	-12	0.4	-11	0.5	-15	0.6	0.4	0.4	0.5
0.6	10	12	12	56	-18	-19	-15	-21	-13	0.3	-16	0.4	-18	0.7	0.4	0.4	0.6
0.6	10	12	12	56	-18	-18	-14	-18	-15	0.3	-14	0.3	-18	0.6	0.5	0.4	0.5
0.6	10	10	12	67	-15	-17	-11	-18	-12	0.2	-12	0.4	-15	0.7	0.4	0.4	0.6
0.6	10	12	12	56	-17	-15	-12	-18	-12	0.3	-14	0.3	-17	0.6	0.3	0.4	0.4
0.6	10	14	13	63	-15	-12	-10	-13	-10	0.2	-10	0.6	-15	0.5	0.2	0.3	0.6
0.6	10	14	13	63	-16	-13	-11	-14	-12	0.3	-12	0.4	-16	0.5	0.5	0.4	0.4
0.6	10	14	13	63	-15	-13	-10	-13	-11	0.2	-10	0.5	-15	0.5	0.2	0.2	0.5
0.6	10	12	13	63	-15	-14	-11	-14	-12	0.3	-11	0.5	-15	0.5	0.4	0.3	0.4
0.6	10	14	13	63	-14	-12	-10	-13	-10	0.2	-10	0.6	-15	0.5	0.2	0.3	0.5
0.6	10	12	13	76	-15	-13	-10	-14	-10	0.3	-10	0.3	-15	0.5	0.3	0.5	0.4
0.6	10	12	13	63	-15	-14	-11	-14	-11	0.3	-10	0.3	-15	0.6	0.2	0.5	0.3
0.6	10	14	13	63	-15	-12	-10	-13	-10	0.2	-10	0.6	-15	0.5	0.2	0.3	0.6
0.6	10	14	13	63	-16	-14	-12	-15	-12	0.4	-12	0.4	-16	0.6	0.5	0.4	0.4
0.6	10	13	13	63	-16	-15	-12	-16	-13	0.2	-12	0.3	-16	0.5	0.3	0.3	0.4
0.6	10	14	13	63	-15	-13	-11	-13	-11	0.2	-10	0.4	-15	0.5	0.3	0.2	0.4
0.6	10	14	13	63	-14	-13	-11	-13	-12	0.2	-11	0.4	-15	0.5	0.3	0.2	0.5
0.6	10	14	13	63	-15	-13	-11	-14	-10	0.2	-11	0.4	-15	0.5	0.1	0.3	0.3
0.6	10	12	13	63	-15	-13	-10	-13	-11	0.2	-11	0.6	-15	0.6	0.2	0.3	0.6
0.6	10	14	13	63	-14	-12	-10	-13	-10	0.2	-10	0.6	-15	0.5	0.2	0.3	0.6
0.6	10	14	13	63	-15	-13	-11	-14	-12	0.3	-11	0.4	-15	0.5	0.4	0.3	0.4
0.6	10	14	13	63	-14	-13	-10	-13	-11	0.2	-10	0.4	-15	0.5	0.3	0.2	0.4
0.6	10	11	13	63	-15	-13	-10	-14	-11	0.3	-11	0.4	-15	0.5	0.4	0.3	0.4
0.6	10	14	13	63	-14	-12	-10	-13	-10	0.3	-10	0.6	-15	0.5	0.2	0.3	0.6
0.6	10	14	13	63	-15	-12	-10	-13	-9	0.2	-10	0.4	-15	0.5	0.1	0.3	0.4
0.6	10	12	13	63	-15	-15	-11	-16	-11	0.2	-11	0.4	-15	0.6	0.4	0.3	0.5
0.6	10	11	13	63	-15	-13	-11	-14	-11	0.3	-11	0.5	-15	0.5	0.3	0.3	0.5
0.6	10	12	13	63	-16	-14	-11	-14	-11	0.4	-11	0.4	-15	0.6	0.3	0.5	0.4
0.6	10	10	13	76	-19	-20	-17	-24	-16	0.3	-18	0.4	-19	0.7	0.3	0.3	0.5
0.6	10	10	13	63	-15	-13	-11	-15	-11	0.3	-11	0.3	-15	0.5	0.3	0.4	0.4
0.6	10	12	13	63	-22	-19	-19	-24	-15	0.2	-19	0.3	-22	0.6	0.2	0.3	0.2
0.6	10	12	13	63	-16	-15	-15	-19	-13	0.2	-15	0.3	-17	0.6	0.2	0.3	0.4
0.6	10	12	13	63	-22	-22	-18	-24	-18	0.2	-18	0.4	-22	0.5	0.4	0.3	0.6
0.6	10	12	14	71	-15	-14	-11	-14	-12	0.3	-11	0.4	-15	0.5	0.4	0.3	0.4
0.6	10	14	14	71	-14	-13	-10	-13	-11	0.2	-10	0.5	-15	0.6	0.2	0.2	0.5
0.6	10	12	14	85	-15	-13	-10	-13	-11	0.3	-10	0.3	-15	0.5	0.2	0.4	0.4
0.6	10	12	14	71	-19	-20	-16	-21	-17	0.2	-16	0.4	-19	0.6	0.3	0.3	0.4
0.6	10	13	14	71	-15	-13	-11	-14	-11	0.3	-11	0.4	-15	0.5	0.4	0.3	0.3
0.6	10	13	14	71	-15	-13	-11	-13	-11	0.3	-11	0.4	-15	0.5	0.4	0.3	0.4
0.6	10	14	14	71	-15	-14	-11	-15	-12	0.3	-12	0.5	-16	0.6	0.4	0.4	0.4
0.6	10	12	14	85	-16	-15	-12	-15	-12	0.3	-12	0.4	-17	0.5	0.5	0.4	0.5
0.6	10	12	14	71	-15	-14	-11	-14	-12	0.3	-11	0.4	-15	0.6	0.4	0.2	0.4
0.6	10	13	14	71	-15	-14	-11	-14	-12	0.3	-12	0.6	-15	0.6	0.3	0.3	0.6
0.6	10	12	14	71	-15	-13	-11	-14	-12	0.3	-11	0.4	-16	0.5	0.4	0.3	0.4
0.6	10	14	14	71	-16	-13	-11	-14	-10	0.3	-11	0.3	-16	0.4	0.1	0.3	0.4
0.6	10	13	15	78	-15	-14	-11	-14	-12	0.3	-11	0.5	-15	0.6	0.4	0.3	0.5
0.6	10	16	15	78	-15	-13	-11	-14	-12	0.3	-11	0.4	-15	0.5	0.4	0.4	0.4
0.6	10	14	15	78	-15	-13	-11	-14	-12	0.3	-11	0.4	-16	0.6	0.4	0.3	0.4
0.6	10	16	15	78	-14	-13	-11	-13	-11	0.2	-11	0.4	-15	0.5	0.3	0.3	0.4
0.6	10	16	15	78	-16	-13	-11	-14	-12	0.3	-12	0.4	-15	0.4	0.4	0.4	0.5
0.6	10	14	16	86	-15	-13	-10	-13	-11	0.2	-10	0.4	-15	0.5	0.2	0.2	0.4
0.6	10	18	16	86	-15	-13	-11	-13	-11	0.3	-11	0.6	-15	0.5	0.2	0.4	0.5
0.6	10	16	17	112	-15	-12	-10	-14	-10	0.3	-11	0.5	-15	0.6	0.2	0.3	0.5
0.6	10	16	17	94	-15	-13	-10	-14	-11	0.3	-10	0.5	-14	0.6	0.4	0.4	0.6
0.7	10	12	9	49	-14	-15	-10	-15	-12	0.2	-10	0.4	-14	0.5	0.3	0.4	0.6
0.7	10	10	12	78	-15	-15	-12	-16	-13	0.2	-12	0.4	-16	0.6	0.3	0.3	0.5
0.7	10	16	15	93	-16	-13	-11	-14	-11	0.3	-11	0.4	-15	0.5	0.4	0.4	0.4
0.7	10	16	16	103	-15	-12	-11	-13	-10	0.2	-11	0.4	-15	0.4	0.1	0.2	0.4
0.7	10	16	16	103	-15	-13	-11	-14	-11	0.3	-11	0.5	-16	0.5	0.2	0.3	0.5
0.7	10	16	17	112	-15	-13	-11	-14	-11	0.3	-11	0.5	-15	0.5	0.2	0.3	0.5
0.7	10	6	7	30	-18	-18	-17	-21	-12	0.3	-15	0.4	-19	0.7	0.3	0.3	0.4
0.7	10	12	14	85	-16	-16	-13	-16	-13	0.2	-13	0.4	-18	0.5	0.3	0.3	0.6
0.7	10	14	13	76	-15	-12	-10	-13	-11	0.3	-11	0.4	-15	0.5	0.4	0.3	0.4
0.7	10	6	7	30	-15	-14	-10	-15	-13	0.2	-11	0.4	-15	0.5	0.4	0.4	0.5
0.7	10	10	12	67	-16	-15	-12	-16	-12	0.3	-12	0.5	-15	0.4	0.5	0.4	0.6
0.7	10	14	13	76	-15	-13	-10	-14	-11	0.4	-11	0.6	-15	0.6	0.4	0.4	0.6
0.7	10	8	9	42	-15	-14	-12	-15	-12	0.3	-12	0.4	-15	0.6	0.5	0.4	0.5
0.7	10	12	12	67	-15	-12	-11	-14	-10	0.3	-11	0.4	-15	0.6	0.2	0.3	0.4
0.7	10	16	17	112	-15	-13	-11	-13	-11	0.3	-11	0.5	-15	0.6	0.2	0.3	0.5
0.7	10	14	13	76	-15	-13	-10	-13	-11	0.2	-10	0.4	-15	0.5	0.2	0.2	0.4
0.7	10	8	9	42	-19	-19	-18	-20	-15	0.2	-16	0.4	-19	0.6	0.3	0.2	0.3
0.7	10	8	9	42	-19	-19	-18	-20	-15	0.2	-16	0.4	-19	0.6	0.3	0.2	0.3
0.7	10	14	14	85	-14	-12	-10	-13	-11	0.3	-11	0.6	-15	0.5	0.2	0.3	0.6
0.7	10	6	8	36	-18	-17	-13	-17	-14	0.4	-14	0.5	-18	0.6	0.6	0.6	0.6
0.7	10	14	13	76	-15	-13	-11	-14	-11	0.3	-12	0.4	-15	0.5	0.5	0.4	0.4
0.7	10	14	15	93	-16	-13	-11	-14	-11	0.3	-11	0.4	-16	0.6	0.5	0.3	0.3
0.7	10	8	11	59	-19	-19	-17	-21	-15	0.2	-16	0.4	-19	0.7	0.3	0.3	0.4
0.7	10	12	12	67	-15	-13	-11	-14	-10	0.3	-11	0.4	-16	0.6	0.2	0.3	0.4
0.7	10	14	13	76	-14	-13	-11	-13	-11	0.2	-10	0.4	-15	0.5	0.3	0.2	0.5
0.7	10	12	14	85	-14	-13	-11	-14	-11	0.3	-10	0.3	-15	0.6	0.2	0.4	0.3
0.7	10	14	13	76	-15	-13	-10	-13	-11	0.2	-10	0.4	-15	0.6	0.3	0.3	0.5
0.7	10	14	13	76	-15	-12	-11	-13	-10	0.2	-11	0.3	-15	0.5	0.2	0.3	0.3
0.7	10	14	13	76	-16	-13	-11	-14	-12	0.3	-12	0.4	-16	0.5	0.4	0.4	0.4
0.7	10	8	9	42	-15	-15	-10	-14	-12	0.4	-10	0.5	-13	0.5	0.5	0.5	0.6
0.7	10	8	9	42	-19	-18	-16	-20	-13	0.3	-16	0.3	-18	0.7	0.3	0.3	0.4
0.7	10	12	14	85	-15	-13	-11	-14	-11	0.2	-11	0.4	-15	0.5	0.2	0.3	0.4
0.7	10	14	14	85	-16	-14	-12	-15	-13	0.2	-12	0.5	-17	0.5	0.3	0.3	0.4
0.7	10	16	15	93	-16	-13	-11	-14	-11	0.3	-11	0.4	-15	0.5	0.4	0.4	0.4
0.7	10	16	16	103	-15	-13	-11	-13	-11	0.3	-11	0.6	-15	0.6	0.3	0.3	0.6
0.7	10	15	14	85	-15	-12	-11	-13	-9	0.3	-11	0.4	-15	0.5	0.1	0.3	0.4
0.7	10	16	17	112	-15	-13	-11	-14	-11	0.3	-11	0.6	-15	0.5	0.3	0.3	0.6
0.7	10	12	11	59	-18	-17	-14	-19	-15	0.3	-15	0.4	-18	0.6	0.3	0.4	0.5
0.7	10	8	9	42	-19	-17	-16	-20	-14	0.3	-16	0.3	-19	0.7	0.4	0.3	0.4
0.7	10	6	6	28	-15	-14	-11	-16	-10	0.3	-11	0.3	-16	0.6	0.3	0.4	0.3
0.7	10	12	13	76	-15	-12	-11	-13	-10	0.2	-11	0.4	-15	0.6	0.2	0.2	0.4
0.7	10	8	8	42	-14	-16	-10	-15	-12	0.3	-11	0.4	-14	0.6	0.4	0.4	0.5
0.7	10	14	13	76	-15	-13	-11	-13	-11	0.3	-12	0.3	-16	0.5	0.4	0.4	0.4
0.7	10	10	10	61	-15	-15	-11	-15	-12	0.3	-12	0.4	-13	0.6	0.3	0.4	0.5
0.7	10	14	13	76	-15	-14	-11	-14	-11	0.3	-11	0.4	-15	0.6	0.4	0.4	0.4
0.7	10	16	16	103	-15	-13	-11	-14	-10	0.3	-11	0.5	-15	0.6	0.2	0.4	0.5
0.7	10	8	9	42	-14	-15	-11	-16	-12	0.3	-11	0.5	-14	0.6	0.4	0.4	0.6
0.7	10	16	16	103	-14	-13	-11	-13	-11	0.2	-11	0.4	-15	0.5	0.3	0.2	0.4
0.7	10	16	17	112	-14	-13	-11	-13	-11	0.3	-11	0.5	-15	0.5	0.3	0.3	0.5
0.7	10	10	12	67	-16	-17	-14	-17	-14	0.3	-12	0.5	-16	0.6	0.4	0.4	0.5
0.7	10	8	9	42	-18	-18	-14	-20	-14	0.2	-15	0.5	-18	0.6	0.3	0.3	0.6
0.7	10	15	14	85	-15	-13	-11	-14	-12	0.3	-11	0.4	-16	0.6	0.4	0.4	0.4
0.7	10	13	12	67	-15	-13	-11	-13	-11	0.4	-11	0.4	-15	0.5	0.5	0.4	0.4
0.7	10	10	12	67	-16	-14	-12	-14	-11	0.3	-12	0.4	-16	0.5	0.2	0.3	0.3
0.7	10	10	12	67	-15	-13	-11	-14	-10	0.3	-10	0.3	-15	0.4	0.2	0.3	0.4
0.7	10	12	13	76	-16	-13	-12	-15	-11	0.3	-12	0.2	-16	0.4	0.2	0.3	0.2
0.7	10	14	15	93	-16	-15	-11	-16	-12	0.2	-11	0.4	-17	0.6	0.3	0.3	0.6
0.7	10	12	13	88	-16	-13	-11	-14	-11	0.3	-11	0.3	-16	0.5	0.2	0.4	0.4
0.7	10	14	15	93	-15	-13	-11	-14	-11	0.3	-11	0.3	-15	0.5	0.2	0.4	0.3
0.7	10	14	15	109	-16	-14	-11	-14	-12	0.3	-11	0.5	-16	0.5	0.4	0.3	0.4
0.7	10	12	12	67	-17	-17	-14	-18	-14	0.2	-14	0.3	-17	0.6	0.3	0.3	0.4
0.7	10	13	13	76	-15	-12	-11	-14	-10	0.3	-11	0.4	-15	0.6	0.2	0.3	0.4
0.7	10	8	9	42	-13	-14	-11	-15	-11	0.3	-11	0.6	-13	0.7	0.5	0.5	0.7
0.7	10	10	11	59	-14	-13	-11	-14	-10	0.3	-10	0.3	-15	0.5	0.2	0.3	0.4
0.7	10	8	8	36	-15	-16	-12	-16	-13	0.3	-12	0.5	-15	0.7	0.4	0.4	0.6
0.7	10	14	14	99	-15	-12	-11	-13	-10	0.3	-10	0.3	-15	0.4	0.2	0.4	0.3
0.7	10	14	13	76	-15	-14	-10	-15	-12	0.3	-12	0.4	-15	0.6	0.4	0.4	0.5
0.7	10	8	9	42	-14	-15	-11	-16	-11	0.3	-11	0.5	-14	0.7	0.5	0.5	0.6
0.7	10	8	9	42	-14	-16	-11	-15	-13	0.4	-11	0.3	-14	0.7	0.4	0.5	0.4
0.7	10	14	15	93	-15	-12	-10	-13	-10	0.3	-10	0.7	-15	0.5	0.3	0.3	0.7
0.7	10	14	15	93	-14	-14	-11	-14	-11	0.3	-10	0.3	-14	0.6	0.2	0.4	0.4
0.7	10	14	15	93	-17	-14	-12	-15	-11	0.3	-11	0.5	-17	0.5	0.3	0.3	0.6
0.7	10	14	14	85	-16	-14	-12	-15	-12	0.3	-12	0.5	-16	0.5	0.3	0.3	0.5
0.7	10	14	13	76	-15	-13	-10	-13	-11	0.3	-10	0.4	-15	0.5	0.4	0.4	0.4
0.7	10	16	15	93	-15	-13	-10	-13	-11	0.3	-10	0.6	-15	0.6	0.4	0.3	0.6
0.7	10	14	13	76	-15	-12	-11	-13	-10	0.3	-11	0.4	-15	0.5	0.1	0.3	0.4
0.7	10	14	13	76	-15	-12	-11	-13	-10	0.3	-11	0.3	-15	0.5	0.1	0.3	0.3
0.7	10	6	7	30	-16	-17	-11	-18	-13	0.3	-12	0.4	-16	0.7	0.5	0.5	0.6
0.7	10	12	13	76	-15	-14	-11	-15	-12	0.3	-11	0.4	-15	0.5	0.4	0.4	0.5
0.7	10	8	8	36	-16	-18	-12	-18	-14	0.2	-13	0.4	-15	0.6	0.4	0.4	0.5
0.7	10	12	14	85	-16	-13	-12	-15	-10	0.3	-11	0.4	-17	0.5	0.3	0.4	0.4
0.7	10	14	15	93	-15	-13	-11	-13	-10	0.2	-10	0.3	-15	0.5	0.2	0.3	0.4
0.7	10	8	10	52	-14	-15	-10	-15	-10	0.3	-11	0.5	-14	0.6	0.4	0.4	0.6
0.7	10	12	12	67	-15	-13	-11	-13	-10	0.3	-10	0.3	-14	0.6	0.2	0.3	0.4
0.7	10	12	14	85	-16	-14	-12	-15	-11	0.3	-12	0.4	-17	0.5	0.3	0.4	0.4
0.7	10	10	11	59	-19	-21	-16	-21	-18	0.2	-16	0.3	-19	0.7	0.3	0.4	0.4
0.7	10	12	14	85	-16	-15	-12	-16	-13	0.3	-12	0.5	-17	0.6	0.4	0.4	0.5
0.7	10	10	10	52	-18	-18	-15	-20	-15	0.3	-15	0.4	-18	0.7	0.3	0.4	0.5
0.7	10	10	10	52	-18	-18	-15	-20	-15	0.3	-15	0.4	-18	0.7	0.3	0.4	0.5
0.7	10	8	12	67	-15	-15	-11	-16	-12	0.2	-11	0.3	-15	0.6	0.4	0.4	0.5
0.7	10	8	12	67	-15	-15	-11	-16	-12	0.2	-11	0.3	-15	0.6	0.4	0.4	0.5
0.7	10	12	12	67	-15	-14	-11	-15	-11	0.3	-11	0.3	-15	0.5	0.4	0.4	0.5
0.7	10	8	10	52	-20	-14	-16	-18	-12	0.2	-13	0.3	-20	0.4	0.2	0.3	0.3
0.7	10	8	10	52	-20	-14	-16	-18	-12	0.2	-13	0.3	-20	0.4	0.2	0.3	0.3
0.7	10	10	10	52	-15	-13	-11	-14	-10	0.2	-10	0.3	-15	0.5	0.2	0.3	0.4
0.7	10	12	13	76	-16	-13	-11	-16	-11	0.3	-12	0.2	-16	0.5	0.2	0.3	0.3
0.7	10	10	10	52	-16	-15	-11	-16	-11	0.3	-12	0.2	-16	0.6	0.3	0.3	0.2
0.7	10	8	10	52	-14	-16	-13	-17	-10	0.3	-11	0.5	-14	0.7	0.4	0.3	0.7
0.7	10	12	14	85	-17	-17	-14	-20	-12	0.2	-14	0.4	-18	0.6	0.3	0.4	0.5
0.7	10	6	7	30	-16	-14	-12	-16	-10	0.3	-11	0.4	-17	0.6	0.4	0.5	0.4
0.7	10	10	12	67	-15	-18	-12	-17	-14	0.3	-12	0.3	-15	0.7	0.4	0.5	0.4
0.8	10	16	17	131	-14	-13	-11	-13	-12	0.3	-11	0.5	-15	0.5	0.3	0.3	0.6
0.8	10	14	13	88	-16	-14	-11	-14	-11	0.3	-11	0.4	-16	0.5	0.5	0.3	0.4
0.8	10	12	13	88	-15	-13	-10	-13	-11	0.2	-10	0.3	-15	0.4	0.2	0.3	0.3
0.8	10	10	12	78	-16	-13	-11	-14	-10	0.2	-10	0.2	-16	0.5	0.2	0.3	0.3
0.8	10	10	11	69	-15	-13	-11	-13	-10	0.2	-10	0.3	-15	0.5	0.2	0.3	0.3
0.8	10	12	13	88	-15	-13	-11	-14	-10	0.3	-11	0.4	-16	0.4	0.2	0.3	0.4
0.8	10	16	16	120	-15	-13	-10	-13	-11	0.2	-10	0.4	-15	0.4	0.3	0.3	0.4
0.8	10	10	11	69	-16	-13	-11	-14	-11	0.2	-11	0.2	-16	0.5	0.2	0.3	0.3
0.8	10	12	14	99	-15	-14	-11	-14	-12	0.3	-11	0.4	-16	0.5	0.4	0.3	0.4
0.8	10	14	14	99	-16	-14	-12	-14	-11	0.3	-11	0.4	-16	0.5	0.2	0.4	0.4
0.8	10	14	15	109	-16	-14	-12	-15	-12	0.3	-12	0.5	-17	0.5	0.4	0.5	0.6
0.8	10	16	17	131	-15	-13	-11	-14	-11	0.3	-11	0.5	-15	0.5	0.2	0.3	0.4
0.8	10	14	15	109	-15	-12	-11	-13	-10	0.3	-10	0.4	-15	0.5	0.2	0.3	0.4
0.8	10	8	9	49	-17	-16	-13	-18	-13	0.4	-14	0.4	-17	0.7	0.4	0.4	0.5
0.8	10	12	12	89	-16	-14	-11	-15	-11	0.2	-11	0.3	-16	0.5	0.2	0.3	0.3
0.8	10	14	14	99	-16	-13	-11	-14	-11	0.3	-11	0.3	-16	0.5	0.2	0.3	0.4
0.8	10	16	16	120	-15	-13	-11	-14	-10	0.3	-11	0.4	-15	0.5	0.2	0.3	0.4
0.8	10	14	14	99	-15	-13	-11	-14	-10	0.3	-11	0.3	-15	0.6	0.2	0.3	0.4
0.8	10	14	14	99	-14	-12	-11	-13	-10	0.2	-10	0.6	-15	0.5	0.2	0.3	0.6
0.8	10	14	14	99	-15	-13	-11	-13	-10	0.3	-11	0.3	-15	0.5	0.2	0.4	0.3
0.8	10	10	12	78	-15	-12	-10	-14	-10	0.3	-11	0.3	-15	0.5	0.2	0.4	0.2
0.8	10	8	9	49	-14	-15	-12	-16	-12	0.3	-12	0.5	-14	0.7	0.5	0.5	0.6
0.8	10	14	15	109	-15	-13	-11	-13	-10	0.3	-10	0.3	-15	0.5	0.2	0.3	0.4
0.8	10	14	15	109	-22	-14	-12	-15	-12	0.3	-11	0.5	-17	0.5	0.4	0.5	0.6
0.8	10	16	17	131	-15	-13	-11	-14	-11	0.3	-11	0.4	-15	0.6	0.2	0.4	0.4
0.8	10	12	12	89	-16	-14	-11	-14	-11	0.3	-11	0.3	-15	0.5	0.2	0.3	0.3
0.8	10	16	17	131	-15	-12	-11	-14	-10	0.3	-11	0.5	-16	0.5	0.2	0.4	0.5
0.8	10	12	13	88	-15	-12	-11	-13	-10	0.3	-10	0.3	-15	0.4	0.2	0.3	0.3
0.8	10	16	17	131	-15	-12	-11	-13	-10	0.3	-11	0.4	-15	0.5	0.2	0.3	0.4
0.8	10	16	17	131	-15	-13	-11	-14	-11	0.3	-11	0.5	-15	0.5	0.2	0.4	0.5
0.8	10	12	14	99	-16	-15	-12	-15	-12	0.3	-12	0.5	-17	0.5	0.3	0.3	0.6
0.8	10	12	12	78	-14	-12	-11	-13	-10	0.2	-10	0.3	-15	0.5	0.2	0.3	0.3
0.8	10	14	14	99	-16	-13	-11	-14	-11	0.3	-12	0.4	-16	0.5	0.2	0.3	0.3
0.8	10	14	14	99	-15	-12	-10	-13	-10	0.3	-11	0.4	-15	0.4	0.1	0.3	0.4
0.8	10	14	14	99	-15	-12	-10	-13	-10	0.3	-11	0.4	-15	0.4	0.1	0.3	0.4
0.8	10	16	16	120	-16	-12	-11	-14	-10	0.3	-11	0.4	-16	0.5	0.2	0.3	0.4
0.8	10	16	17	131	-15	-13	-11	-14	-11	0.3	-11	0.6	-15	0.6	0.2	0.3	0.6
0.8	10	8	11	69	-14	-16	-11	-16	-12	0.3	-11	0.4	-14	0.7	0.5	0.5	0.5
0.8	10	10	11	69	-15	-13	-11	-14	-10	0.3	-11	0.3	-15	0.6	0.2	0.3	0.3
0.8	10	12	13	88	-15	-13	-11	-14	-10	0.2	-11	0.2	-16	0.5	0.2	0.3	0.4
0.8	10	14	15	109	-18	-19	-15	-19	-15	0.3	-14	0.4	-18	0.6	0.3	0.3	0.5
0.8	10	14	15	109	-15	-13	-10	-14	-10	0.2	-10	0.3	-15	0.5	0.2	0.3	0.4
0.8	10	12	12	89	-15	-13	-11	-14	-11	0.3	-11	0.3	-16	0.5	0.2	0.4	0.3
0.8	10	12	12	78	-15	-12	-11	-13	-9	0.3	-10	0.3	-15	0.4	0.2	0.3	0.4
0.8	10	10	12	78	-15	-12	-11	-14	-10	0.3	-11	0.3	-15	0.5	0.2	0.4	0.3
0.8	10	12	14	99	-16	-14	-11	-15	-11	0.3	-12	0.3	-16	0.6	0.1	0.4	0.2
0.8	10	16	16	120	-15	-12	-11	-13	-10	0.3	-11	0.4	-15	0.5	0.2	0.3	0.4
0.8	10	10	12	78	-17	-17	-15	-20	-14	0.2	-16	0.3	-17	0.7	0.3	0.3	0.4
0.8	10	14	14	99	-15	-13	-11	-14	-10	0.3	-11	0.4	-16	0.4	0.2	0.4	0.4
0.8	10	12	14	99	-15	-13	-11	-14	-11	0.3	-11	0.5	-15	0.5	0.2	0.3	0.5
0.8	10	14	15	109	-16	-14	-11	-14	-12	0.4	-12	0.5	-16	0.5	0.4	0.4	0.5
0.8	10	12	13	88	-15	-13	-11	-14	-10	0.2	-11	0.2	-16	0.5	0.2	0.3	0.3
0.8	10	12	14	99	-17	-15	-13	-18	-11	0.3	-13	0.3	-17	0.6	0.2	0.4	0.3
0.8	10	16	17	150	-15	-13	-11	-14	-10	0.3	-11	0.5	-15	0.6	0.2	0.3	0.5
0.8	10	12	14	99	-17	-14	-12	-16	-11	0.3	-13	0.3	-17	0.5	0.1	0.4	0.2
0.8	10	10	12	78	-16	-14	-12	-15	-11	0.3	-12	0.4	-16	0.6	0.2	0.4	0.3
0.8	10	10	12	78	-19	-17	-15	-20	-14	0.3	-16	0.2	-19	0.6	0.2	0.3	0.3
0.8	10	12	14	99	-16	-15	-12	-15	-12	0.3	-12	0.4	-17	0.5	0.4	0.4	0.5
0.8	10	14	15	109	-15	-12	-11	-13	-10	0.2	-10	0.3	-15	0.5	0.2	0.3	0.4
0.8	10	12	13	88	-15	-13	-11	-14	-11	0.2	-11	0.3	-15	0.6	0.2	0.3	0.3
0.8	10	12	14	99	-16	-14	-12	-15	-12	0.3	-12	0.4	-17	0.5	0.4	0.4	0.5
0.8	10	14	15	109	-16	-13	-11	-14	-11	0.3	-11	0.4	-16	0.5	0.2	0.4	0.4
0.8	10	10	11	69	-14	-12	-10	-13	-10	0.2	-10	0.3	-15	0.5	0.2	0.3	0.3
0.8	10	14	15	109	-15	-13	-11	-13	-10	0.2	-10	0.3	-15	0.5	0.2	0.3	0.4
0.8	10	12	14	101	-15	-12	-11	-13	-10	0.2	-10	0.3	-16	0.5	0.2	0.2	0.4
0.8	10	12	13	88	-15	-12	-10	-13	-9	0.3	-11	0.3	-15	0.5	0.2	0.3	0.3
0.8	10	12	12	78	-16	-14	-12	-15	-12	0.3	-11	0.5	-16	0.5	0.4	0.5	0.5
0.8	10	10	11	69	-16	-16	-12	-16	-12	0.3	-12	0.5	-17	0.5	0.4	0.3	0.5
0.8	10	12	13	88	-16	-13	-11	-14	-11	0.3	-11	0.4	-16	0.5	0.2	0.3	0.4
0.8	10	12	14	99	-16	-15	-12	-15	-12	0.3	-12	0.5	-16	0.6	0.5	0.4	0.6
0.8	10	10	12	78	-16	-14	-12	-15	-13	0.4	-12	0.5	-16	0.7	0.5	0.5	0.5
0.8	10	14	15	109	-15	-13	-11	-14	-10	0.2	-10	0.2	-16	0.5	0.2	0.3	0.3
0.8	10	12	13	88	-16	-13	-11	-14	-11	0.3	-12	0.4	-16	0.4	0.2	0.4	0.4
0.8	10	14	15	109	-15	-12	-11	-13	-10	0.2	-11	0.3	-15	0.5	0.2	0.2	0.3
0.8	10	10	12	78	-14	-14	-11	-15	-12	0.2	-12	0.4	-15	0.6	0.3	0.4	0.4
0.8	10	12	13	88	-16	-13	-11	-14	-11	0.3	-12	0.4	-16	0.5	0.1	0.3	0.4
0.8	10	12	14	99	-16	-14	-11	-14	-12	0.2	-12	0.4	-16	0.6	0.3	0.3	0.5
0.8	10	6	7	35	-16	-14	-12	-16	-12	0.4	-12	0.5	-16	0.7	0.5	0.5	0.5
0.8	10	12	14	99	-16	-13	-11	-14	-10	0.3	-11	0.3	-15	0.4	0.2	0.4	0.3
0.9	10	10	12	89	-14	-12	-11	-13	-10	0.3	-10	0.3	-15	0.5	0.2	0.4	0.3
0.9	10	12	14	113	-15	-12	-11	-13	-10	0.2	-10	0.3	-15	0.5	0.2	0.3	0.4

## Sheet: Sheet2
xiao_ban	sen_lin_lb	mian_ji	xiaoban_xj	jingyingcs	yu_bi_du	you_shi_sz	pingjunnl	pingjunxiongj	pingjungao	ling_zu	po_wei	po_xiang	po_du_ji	hai_ba	pjxj	hh0207	hv0807	hh0622	hv0922	hh0807	hv622922	hh0922	hv922807	hh1223	hh12230207	hh622807	hh622922	hh922807
1	1	5	30	10	0.2	10	30	10	8	2	5	4	2	0	6	-22	-15	-15	-16	-12	0.2	-12	0.3	-22	0.5	0.2	0.3	0.3
1	1	11	77	10	0.2	10	25	10	9	2	5	4	6	0	7	-17	-14	-12	-17	-11	0.1	-11	0.4	-16	0.3	0.1	0.1	0.5
1	1	33	66	10	0.2	10	10	4	4	1	4	4	5	0	2	-16	-16	-13	-18	-10	0.3	-13	0.4	-16	0.6	0.3	0.4	0.6
1	1	33	66	10	0.2	10	10	4	4	1	4	4	5	0	2	-16	-16	-13	-18	-10	0.3	-13	0.4	-16	0.6	0.3	0.4	0.6
1	1	33	66	10	0.2	10	10	4	4	1	4	4	5	0	2	-16	-16	-13	-18	-10	0.3	-13	0.4	-16	0.6	0.3	0.4	0.6
1	1	33	66	10	0.2	10	10	4	4	1	4	4	5	0	2	-16	-16	-13	-18	-10	0.3	-13	0.4	-16	0.6	0.3	0.4	0.6
2	1	3	27	10	0.2	10	30	10	10	2	4	3	2	0	9	-20	-18	-19	-23	-15	0.2	-18	0.2	-20	0.4	0.3	0.3	0.3
2	1	3	27	10	0.2	10	30	10	10	2	4	3	2	0	9	-20	-18	-19	-23	-15	0.2	-18	0.2	-20	0.4	0.3	0.3	0.3
2	1	5	35	10	0.2	10	25	10	9	2	5	1	8	0	7	-17	-18	-13	-19	-14	0.3	-14	0.4	-17	0.7	0.5	0.5	0.6
2	2	5	60	10	0.2	10	20	6	8	1	5	4	2	0	12	-17	-20	-12	-22	-12	0.5	-13	0.5	-17	0.7	0.8	0.8	0.8
2	1	13	78	10	0.2	10	20	10	8	1	4	4	3	0	6	-14	-18	-15	-20	-10	0.2	-14	0.2	-14	0.7	0.2	0.3	0.5
2	1	14	56	10	0.2	10	10	2	4	1	4	3	5	0	4	-15	-15	-11	-15	-11	0.2	-10	0.4	-15	0.6	0.3	0.3	0.5
2	2	27	594	10	0.2	10	35	12	12	2	3	1	8	0	22	-15	-16	-11	-16	-11	0.4	-11	0.4	-15	0.7	0.5	0.5	0.6
3	2	4	80	10	0.2	10	30	10	11	2	4	3	4	0	20	-22	-25	-20	-26	-19	0.2	-19	0.4	-22	0.4	0.5	0.4	0.6
3	1	7	49	10	0.2	10	30	10	9	2	4	4	5	0	7	-18	-15	-13	-19	-12	0.4	-14	0.2	-18	0.6	0.3	0.5	0.3
3	1	7	49	10	0.2	10	30	10	9	2	4	4	5	0	7	-18	-15	-13	-19	-12	0.4	-14	0.2	-18	0.6	0.3	0.5	0.3
3	3	25	150	4	0.2	10	25	8	8	2	5	2	6	0	6	-16	-15	-11	-16	-12	0.3	-12	0.5	-15	0.6	0.4	0.4	0.6
4	1	5	10	10	0.2	10	10	2	3	1	5	4	3	0	2	-22	-18	-16	-20	-13	0.1	-15	0.2	-17	0.5	0.1	0.2	0.3
4	1	9	99	10	0.2	10	30	12	12	2	3	3	5	0	11	-15	-16	-12	-17	-13	0.4	-12	0.5	-15	0.7	0.5	0.6	0.5
4	2	9	126	10	0.2	10	20	8	9	1	5	1	2	0	14	-22	-25	-22	-26	-20	0.1	-20	0.2	-22	0.6	0.2	0.2	0.2
4	2	14	196	10	0.2	10	40	10	9	2	4	3	5	0	14	-18	-20	-18	-21	-16	0.2	-16	0.4	-18	0.7	0.3	0.3	0.5
4	1	21	126	10	0.2	10	15	7	8	1	4	3	5	0	6	-14	-13	-10	-13	-10	0.2	-10	0.6	-15	0.6	0.2	0.3	0.6
4	1	26	104	10	0.2	10	15	6	6	1	4	4	3	0	4	-19	-16	-16	-19	-13	0.3	-16	0.2	-19	0.5	0.2	0.3	0.3
4	1	26	104	10	0.2	10	15	6	6	1	4	4	3	0	4	-19	-16	-16	-19	-13	0.3	-16	0.2	-19	0.5	0.2	0.3	0.3
5	1	3	21	10	0.2	10	25	10	9	2	4	3	6	0	7	-17	-18	-14	-19	-14	0.2	-15	0.5	-17	0.5	0.3	0.3	0.6
5	1	3	9	10	0.2	10	20	6	5	1	4	1	2	0	3	-18	-18	-18	-22	-13	0.2	-16	0.2	-18	0.6	0.2	0.3	0.4
5	1	4	8	10	0.2	10	15	4	3	1	4	4	2	0	2	-10	-23	-8	-24	-8	0.2	-8	0.4	-10	0.9	0.3	0.2	0.8
5	2	6	36	10	0.2	10	10	6	5	1	5	1	5	0	6	-18	-19	-14	-19	-15	0.2	-15	0.5	-18	0.5	0.2	0.3	0.6
5	2	8	200	10	0.2	10	35	12	13	2	5	1	2	0	25	-15	-13	-11	-14	-12	0.2	-11	0.4	-15	0.5	0.3	0.3	0.5
5	2	8	16	10	0.2	10	8	2	3	1	3	1	5	0	2	-17	-19	-16	-22	-13	0.2	-16	0.3	-18	0.6	0.3	0.2	0.5
5	1	13	91	10	0.2	10	30	10	9	2	3	1	2	0	7	-19	-16	-16	-21	-14	0.2	-17	0.3	-20	0.4	0.2	0.3	0.4
5	2	16	96	10	0.2	10	25	8	8	2	5	1	6	0	6	-15	-14	-10	-15	-10	0.2	-10	0.3	-16	0.6	0.3	0.2	0.4
6	3	6	54	4	0.2	10	25	10	10	2	4	1	6	0	9	-16	-15	-10	-16	-11	0.2	-10	0.6	-15	0.4	0.3	0.3	0.7
6	2	7	35	10	0.2	10	20	8	7	1	5	4	5	0	5	-18	-18	-16	-19	-14	0.3	-15	0.4	-18	0.6	0.3	0.4	0.5
6	3	7	28	10	0.2	10	20	6	6	1	5	1	6	0	4	-16	-14	-11	-15	-12	0.3	-11	0.4	-15	0.5	0.4	0.4	0.5
6	1	11	110	10	0.2	10	15	6	7	1	4	3	5	0	10	-19	-18	-18	-23	-15	0.2	-18	0.3	-19	0.7	0.3	0.3	0.4
6	1	31	527	10	0.2	10	25	10	10	2	5	3	6	0	17	-16	-17	-13	-18	-13	0.3	-13	0.5	-16	0.6	0.4	0.4	0.6
7	1	3	15	10	0.2	10	30	8	7	2	4	1	3	0	5	-17	-14	-11	-17	-12	0.2	-13	0.2	-17	0.5	0.2	0.3	0.2
7	1	3	6	10	0.2	10	5	2	4	1	4	2	5	0	2	-12	-16	-9	-20	-4	0.3	-8	0.5	-11	0.8	0.6	0.5	0.7
7	2	6	120	10	0.2	10	30	8	11	2	3	1	5	0	20	-16	-16	-11	-17	-12	0.4	-12	0.4	-15	0.7	0.5	0.5	0.6
7	2	6	84	10	0.2	10	40	10	9	2	5	1	5	0	14	-21	-20	-15	-21	-16	0.4	-17	0.4	-21	0.6	0.4	0.4	0.5
7	2	6	72	10	0.2	10	30	8	8	2	2	3	5	0	12	-17	-17	-12	-18	-14	0.3	-14	0.5	-17	0.7	0.4	0.4	0.6
7	3	9	45	10	0.2	10	15	6	7	1	4	1	5	0	5	-18	-19	-15	-22	-13	0.2	-16	0.3	-17	0.6	0.3	0.3	0.4
7	1	11	77	10	0.2	10	25	10	9	2	5	4	6	0	7	-18	-16	-14	-18	-13	0.2	-14	0.3	-19	0.4	0.2	0.2	0.4
7	3	12	60	10	0.2	10	20	6	7	1	5	1	6	0	5	-16	-13	-11	-15	-12	0.3	-11	0.4	-15	0.6	0.5	0.4	0.5
7	2	14	126	10	0.2	10	20	6	10	1	5	2	2	0	9	-16	-16	-13	-19	-12	0.2	-14	0.4	-16	0.7	0.4	0.3	0.5
7	2	23	138	10	0.2	10	15	6	8	1	5	1	2	0	6	-15	-14	-11	-15	-12	0.3	-11	0.4	-15	0.6	0.4	0.3	0.5
7	3	28	140	10	0.2	10	20	6	7	1	5	1	6	0	5	-16	-16	-13	-18	-13	0.2	-14	0.3	-16	0.5	0.3	0.3	0.5
8	2	3	36	10	0.2	10	30	8	8	2	3	3	5	0	12	-19	-21	-18	-22	-16	0.3	-17	0.4	-19	0.7	0.4	0.3	0.5
8	3	7	42	10	0.2	10	10	4	5	1	2		5	0	6	-17	-17	-13	-22	-10	0.3	-14	0.2	-17	0.7	0.1	0.3	0.3
8	3	9	45	10	0.2	10	20	6	7	1	5	1	6	0	5	-15	-15	-11	-19	-8	0.3	-11	0.4	-15	0.7	0.4	0.4	0.7
9	2	10	70	10	0.2	10	25	8	9	2	4	1	6	0	7	-17	-18	-16	-18	-13	0.3	-14	0.4	-16	0.7	0.3	0.3	0.5
9	2	23	391	10	0.2	10	15	6	10	1	5	1	2	0	17	-17	-19	-15	-21	-15	0.2	-15	0.3	-17	0.6	0.3	0.3	0.5
9	1	30	180	10	0.2	10	30	8	8	2	4	4	2	0	6	-16	-16	-13	-17	-14	0.2	-14	0.4	-16	0.6	0.3	0.3	0.5
10	2	9	180	10	0.2	10	25	8	11	2	4	2	4	0	20	-20	-19	-17	-22	-16	0.3	-16	0.3	-19	0.6	0.3	0.3	0.5
10	2	10	140	10	0.2	10	30	10	9	2	4	3	8	0	14	-18	-16	-13	-16	-13	0.3	-13	0.4	-18	0.5	0.4	0.4	0.5
10	2	16	352	10	0.2	10	30	8	12	2	5	3	5	0	22	-16	-15	-11	-16	-12	0.3	-12	0.5	-16	0.6	0.4	0.4	0.6
10	1	24	120	10	0.2	10	25	8	7	2	4	1	2	0	5	-17	-15	-15	-20	-11	0.2	-15	0.3	-17	0.6	0.2	0.3	0.4
10	1	25	275	10	0.2	10	30	12	12	2	5	1	6	0	11	-16	-16	-11	-17	-12	0.2	-12	0.3	-16	0.5	0.4	0.4	0.4
10	2	25	425	10	0.2	10	20	8	10	1	4	2	5	0	17	-16	-16	-13	-17	-12	0.3	-12	0.5	-16	0.6	0.4	0.4	0.6
11	1	10	70	10	0.2	10	30	12	9	2	4	4	9	0	7	-20	-18	-18	-22	-16	0.1	-18	0.3	-20	0.5	0.2	0.2	0.3
11	3	13	364	4	0.2	10	40	12	14	2	2		6	0	28	-17	-15	-12	-17	-13	0.3	-13	0.4	-17	0.6	0.2	0.4	0.4
11	1	36	432	10	0.2	10	30	8	8	2	4	2	5	0	12	-17	-16	-13	-20	-10	0.3	-14	0.3	-17	0.6	0.3	0.4	0.4
12	2	8	112	10	0.2	10	20	4	9	1	5	1	4	0	14	-16	-15	-12	-15	-13	0.2	-12	0.4	-16	0.6	0.4	0.4	0.5
12	1	11	66	10	0.2	10	25	8	8	2	4	4	2	0	6	-16	-14	-12	-15	-12	0.3	-12	0.3	-16	0.5	0.3	0.4	0.4
12	3	14	280	4	0.2	10	30	10	11	2	2		5	0	20	-17	-17	-13	-18	-14	0.3	-13	0.4	-17	0.6	0.4	0.4	0.5
12	2	24	408	10	0.2	10	25	10	10	2	5	1	6	0	17	-19	-16	-13	-18	-13	0.3	-14	0.3	-16	0.6	0.4	0.4	0.5
12	2	38	646	10	0.2	10	35	10	10	2	2	1	6	0	17	-14	-16	-11	-16	-13	0.4	-11	0.4	-15	0.7	0.4	0.5	0.5
13	3	16	176	4	0.2	10	35	12	12	2	5	2	6	0	11	-17	-17	-14	-19	-11	0.2	-14	0.4	-16	0.6	0.3	0.3	0.5
14	1	4	24	10	0.2	10	25	8	8	2	5	2	6	0	6	-19	-17	-17	-20	-16	0.2	-17	0.4	-20	0.6	0.2	0.2	0.4
14	1	9	27	10	0.2	10	20	6	5	1	4	1	3	0	3	-17	-17	-14	-17	-14	0.2	-14	0.5	-17	0.6	0.3	0.3	0.6
14	3	10	220	4	0.2	10	35	10	12	2	3		5	0	22	-17	-15	-12	-17	-13	0.3	-13	0.3	-17	0.6	0.2	0.4	0.2
14	2	15	330	10	0.2	10	35	12	12	2	3	1	8	0	22	-17	-15	-13	-17	-12	0.3	-13	0.4	-17	0.6	0.3	0.4	0.5
14	1	18	36	10	0.2	10	10	2	4	1	5	4	2	0	2	-16	-15	-12	-16	-11	0.2	-11	0.2	-16	0.5	0.2	0.3	0.3
15	2	4	32	10	0.2	10	25	6	6	2	2	3	5	0	8	-20	-24	-19	-24	-19	0.2	-19	0.3	-20	0.6	0.2	0.2	0.3
15	2	4	12	10	0.2	10	10	2	3	1	4	1	8	0	3	-18	-20	-14	-21	-15	0.2	-15	0.3	-18	0.6	0.2	0.3	0.5
15	2	9	36	10	0.2	10	20	6	6	1	5	1	9	0	4	-19	-18	-19	-23	-15	0.2	-18	0.3	-19	0.5	0.2	0.2	0.4
16	1	4	20	10	0.2	10	25	8	7	2	4	2	3	0	5	-16	-15	-13	-17	-12	0.4	-13	0.3	-16	0.6	0.3	0.4	0.3
17	1	11	66	10	0.2	10	20	8	8	1	5	1	6	0	6	-19	-19	-17	-21	-16	0.3	-17	0.4	-19	0.6	0.4	0.4	0.5
17	2	26	182	10	0.2	10	25	8	9	2	4	3	5	0	7	-17	-17	-12	-19	-12	0.2	-13	0.4	-17	0.6	0.3	0.3	0.5
18	1	15	30	10	0.2	10	5	2	3	1	4	4	5	0	2	-16	-14	-12	-16	-12	0.3	-13	0.3	-16	0.5	0.2	0.4	0.3
18	1	15	30	10	0.2	10	5	2	3	1	4	4	5	0	2	-16	-14	-12	-16	-12	0.3	-13	0.3	-16	0.5	0.2	0.4	0.3
18	1	15	30	10	0.2	10	5	2	3	1	4	4	5	0	2	-16	-14	-12	-16	-12	0.3	-13	0.3	-16	0.5	0.2	0.4	0.3
19	1	16	176	10	0.2	10	30	12	12	2	5	1	6	0	11	-15	-17	-11	-17	-11	0.3	-11	0.4	-15	0.6	0.4	0.4	0.6
1	3	3	30	10	0.3	10	10	5	7	1	1	1	3	0	10	-14	-15	-10	-14	-12	0.5	-10	0.5	-14	0.7	0.6	0.5	0.4
1	1	4	8	10	0.3	10	5	3	3	1	3	3	5	0	2	-17	-16	-11	-18	-12	0.3	-13	0.4	-17	0.7	0.4	0.5	0.5
1	2	8	224	10	0.3	10	50	16	13	3	4	3	5	0	28	-17	-20	-14	-21	-14	0.2	-15	0.4	-17	0.7	0.3	0.3	0.6
1	2	9	153	10	0.3	10	30	10	10	2	5	3	6	0	17	-16	-12	-11	-14	-11	0.3	-11	0.5	-15	0.5	0.4	0.3	0.5
1	1	14	56	10	0.3	10	6	4	4	1	5	1	5	0	4	-15	-13	-10	-15	-9	0.2	-10	0.2	-15	0.5	0.2	0.3	0.2
1	1	21	210	10	0.3	10	30	8	7	2	4	4	5	0	10	-17	-15	-12	-16	-13	0.2	-13	0.4	-17	0.6	0.3	0.3	0.4
1	1	21	210	10	0.3	10	30	8	7	2	4	4	5	0	10	-17	-15	-12	-16	-13	0.2	-13	0.4	-17	0.6	0.3	0.3	0.4
1	1	21	210	10	0.3	10	30	8	7	2	4	4	5	0	10	-17	-15	-12	-16	-13	0.2	-13	0.4	-17	0.6	0.3	0.3	0.4
1	1	25	625	10	0.3	10	35	16	13	2	3	3	7	0	25	-15	-13	-10	-14	-11	0.3	-11	0.6	-15	0.7	0.3	0.3	0.6
2	2	4	104	10	0.3	10	25	8	10	2	4	4	5	0	26	-15	-20	-12	-21	-13	0.4	-13	0.6	-16	0.8	0.6	0.6	0.8
2	2	6	108	10	0.3	10	20	8	8	1	4	1	6	0	18	-18	-19	-16	-20	-16	0.3	-16	0.4	-18	0.7	0.4	0.4	0.5
2	1	6	54	10	0.3	10	10	4	5	1	4	3	5	0	9	-18	-18	-18	-18	-13	0.3	-14	0.4	-18	0.7	0.3	0.3	0.4
2	2	8	32	10	0.3	10	5	2	4	1	4	3	9	0	4	-16	-16	-13	-17	-13	0.3	-13	0.5	-17	0.7	0.3	0.4	0.6
2	1	10	80	10	0.3	10	20	6	6	1	4	3	6	0	8	-14	-14	-10	-16	-11	0.4	-11	0.4	-15	0.5	0.4	0.4	0.5
2	3	12	264	4	0.3	10	30	12	12	2	4	4	5	0	22	-16	-16	-12	-16	-12	0.2	-11	0.4	-16	0.5	0.4	0.3	0.5
2	1	20	240	10	0.3	10	15	7	8	1	3	1	2	0	12	-15	-14	-11	-14	-11	0.3	-12	0.6	-15	0.5	0.3	0.4	0.6
3	3	3	75	4	0.3	10	40	12	13	2	3		3	0	25	-18	-16	-13	-19	-12	0.2	-13	0.2	-18	0.7	0.2	0.3	0.4
3	3	4	48	10	0.3	10	15	6	8	1	2	3	2	0	12	-16	-14	-12	-15	-12	0.4	-13	0.4	-16	0.6	0.4	0.4	0.4
3	3	7	294	10	0.3	10	40	14	14	2	3		3	0	42	-15	-14	-11	-14	-11	0.2	-11	0.4	-16	0.5	0.4	0.2	0.4
3	2	12	252	10	0.3	10	20	8	9	1	4	1	5	0	21	-15	-17	-11	-18	-12	0.4	-13	0.5	-15	0.7	0.5	0.5	0.6
3	3	13	156	10	0.3	10	15	7	8	1	3	1	5	0	12	-16	-15	-11	-14	-12	0.4	-12	0.4	-15	0.6	0.4	0.3	0.4
3	1	19	228	10	0.3	10	25	10	8	2	3	1	7	0	12	-15	-16	-11	-16	-12	0.3	-12	0.4	-15	0.7	0.4	0.5	0.6
3	2	24	336	10	0.3	10	25	8	9	2	5	4	4	0	14	-19	-20	-18	-23	-16	0.2	-17	0.3	-19	0.7	0.3	0.3	0.4
3	1	47	188	10	0.3	10	3	4	4	1	5	4	5	0	4	-17	-17	-13	-18	-13	0.2	-13	0.4	-17	0.6	0.3	0.3	0.4
3	1	53	1325	10	0.3	10	25	11	13	2	4	3	5	0	25	-16	-15	-11	-15	-13	0.2	-12	0.4	-16	0.6	0.3	0.3	0.4
3	3	64	1280	4	0.3	10	30	13	11	2	3	3	6	0	20	-15	-14	-11	-15	-12	0.3	-12	0.4	-15	0.6	0.5	0.4	0.4
3	1	70	1190	10	0.3	10	20	12	10	1	3	1	4	0	17	-17	-19	-13	-20	-15	0.3	-14	0.4	-17	0.7	0.5	0.5	0.6
3	1	86	1204	10	0.3	10	20	8	9	1	4	3	3	0	14	-15	-13	-11	-14	-11	0.2	-11	0.5	-15	0.6	0.2	0.3	0.6
4	1	4	48	10	0.3	10	25	8	8	2	4	3	3	0	12	-15	-13	-10	-15	-10	0.3	-10	0.4	-16	0.4	0.3	0.4	0.5
4	0	7	140		0.3	10	25	12	11	2	3	3	5	0	20	-15	-12	-11	-13	-10	0.3	-11	0.4	-15	0.6	0.1	0.3	0.4
4	1	8	112	10	0.3	10	25	9	9	2	3	1	5	0	14	-15	-13	-11	-14	-11	0.4	-12	0.6	-15	0.6	0.3	0.4	0.6
4	3	12	144	10	0.3	10	20	6	6	1	4	3	5	0	12	-19	-20	-17	-22	-15	0.2	-16	0.3	-19	0.4	0.2	0.2	0.5
4	3	14	126	10	0.3	10	20	6	5	1	3	3	5	0	9	-16	-20	-13	-20	-14	0.3	-14	0.3	-16	0.6	0.3	0.3	0.5
4	1	17	136	10	0.3	10	15	6	6	1	5	4	2	0	8	-17	-14	-13	-16	-12	0.3	-13	0.2	-17	0.6	0.2	0.3	0.2
4	2	22	220	10	0.3	10	40	8	7	2	4	3	5	0	10	-16	-18	-12	-19	-13	0.4	-13	0.5	-16	0.6	0.5	0.5	0.7
4	1	26	260	10	0.3	10	15	8	7	1	3	3	5	0	10	-14	-14	-11	-14	-11	0.4	-11	0.5	-14	0.7	0.6	0.5	0.5
4	2	35	1050	10	0.3	10	30	8	11	2	5	4	5	0	30	-15	-14	-11	-16	-12	0.2	-12	0.4	-15	0.5	0.3	0.3	0.5
5	1	9	108	10	0.3	10	30	8	8	2	3	3	5	0	12	-20	-18	-20	-24	-14	0.2	-19	0.2	-20	0.6	0.2	0.3	0.3
5	3	10	120	10	0.3	10	20	8	8	1	2	1	5	0	12	-15	-13	-11	-14	-12	0.4	-11	0.3	-15	0.6	0.5	0.4	0.4
5	2	14	196	10	0.3	10	20	10	9	1	5	1	5	0	14	-15	-17	-11	-17	-13	0.3	-13	0.4	-15	0.7	0.4	0.4	0.6
5	3	16	96	10	0.3	10	15	3	4	1	4	1	5	0	6	-17	-17	-14	-17	-14	0.2	-13	0.5	-17	0.7	0.3	0.2	0.5
5	2	25	425	10	0.3	10	25	10	10	2	4	2	6	0	17	-18	-20	-16	-24	-14	0.3	-17	0.3	-18	0.7	0.5	0.4	0.6
5	3	27	270	10	0.3	10	15	8	7	1	4	1	8	0	10	-16	-15	-12	-15	-13	0.2	-12	0.4	-16	0.5	0.3	0.3	0.5
5	3	47	1316	4	0.3	10	40	18	14	2	4	1	7	0	28	-15	-13	-10	-14	-11	0.3	-10	0.4	-15	0.5	0.4	0.4	0.4
6	1	6	48	10	0.3	10	20	6	6	1	4	1	2	0	8	-19	-18	-16	-20	-14	0.2	-15	0.3	-19	0.6	0.2	0.3	0.4
6	1	13	182	10	0.3	10	25	9	9	2	3	1	5	0	14	-15	-14	-11	-14	-11	0.3	-11	0.5	-15	0.6	0.3	0.4	0.5
6	3	15	270	10	0.3	10	15	6	8	1	4	1	5	0	18	-16	-15	-12	-17	-11	0.2	-12	0.4	-15	0.6	0.4	0.3	0.5
6	1	15	180	10	0.3	10	20	8	8	1	4	2	6	0	12	-18	-18	-16	-21	-14	0.3	-16	0.4	-18	0.6	0.4	0.4	0.5
6	1	15	180	10	0.3	10	20	8	8	1	4	2	6	0	12	-18	-18	-16	-21	-14	0.3	-16	0.4	-18	0.6	0.4	0.4	0.5
6	1	19	114	10	0.3	10	10	3	4	1	4	2	8	0	6	-17	-14	-13	-17	-11	0.2	-13	0.2	-17	0.5	0.3	0.3	0.3
6	3	21	420	4	0.3	10	30	10	11	2	4		5	0	20	-16	-15	-12	-15	-12	0.3	-12	0.5	-17	0.5	0.4	0.4	0.5
6	2	36	1080	10	0.3	10	30	10	11	2	4	1	5	0	30	-17	-17	-13	-19	-12	0.3	-14	0.4	-17	0.6	0.5	0.4	0.6
7	3	3	36	10	0.3	10	15	6	8	1	3	1	5	0	12	-15	-15	-11	-15	-13	0.2	-13	0.3	-16	0.5	0.2	0.2	0.4
7	1	3	12	10	0.3	10	10	4	4	1	5	3	5	0	4	-20	-16	-16	-22	-15	0.4	-18	0.4	-20	0.6	0.4	0.4	0.5
7	2	5	90	10	0.3	10	15	6	8	1	4	2	5	0	18	-18	-18	-16	-21	-14	0.2	-17	0.3	-18	0.7	0.3	0.2	0.5
7	2	13	78	10	0.3	10	10	3	5	1	4	3	5	0	6	-16	-17	-12	-17	-10	0.2	-10	0.4	-16	0.6	0.3	0.2	0.4
7	1	40	800	10	0.3	10	25	12	11	2	4	3	5	0	20	-16	-15	-12	-16	-13	0.2	-12	0.3	-16	0.7	0.3	0.3	0.4
8	1	6	18	10	0.3	10	10	2	3	1	4	4	3	0	3	-17	-17	-14	-21	-11	0.3	-14	0.3	-17	0.7	0.4	0.5	0.5
8	2	7	42	10	0.3	10	5	3	4	1	3	3	2	0	6	-16	-16	-12	-17	-13	0.4	-13	0.4	-16	0.7	0.5	0.5	0.5
8	1	8	96	10	0.3	10	10	4	6	1	3	1	5	0	12	-14	-14	-11	-14	-12	0.4	-11	0.5	-14	0.7	0.6	0.4	0.4
8	1	25	300	10	0.3	10	20	6	8	1	5	3	5	0	12	-18	-18	-15	-19	-15	0.2	-15	0.4	-18	0.5	0.2	0.3	0.5
8	3	48	864	4	0.3	10	30	8	8	2	4	1	5	0	18	-16	-17	-11	-17	-13	0.2	-12	0.4	-16	0.5	0.3	0.3	0.5
9	1	11	187	10	0.3	10	20	9	10	1	3	3	5	0	17	-16	-13	-10	-14	-12	0.3	-11	0.5	-16	0.5	0.4	0.3	0.5
9	1	12	216	10	0.3	10	20	8	8	1	4	2	5	0	18	-17	-16	-14	-18	-12	0.3	-13	0.3	-17	0.6	0.3	0.4	0.3
9	1	29	232	10	0.3	10	15	5	6	1	5	1	6	0	8	-16	-14	-12	-16	-12	0.3	-13	0.2	-17	0.5	0.3	0.3	0.3
10	2	3	78	10	0.3	10	20	6	10	1	4	2	5	0	26	-18	-19	-15	-23	-14	0.2	-17	0.3	-18	0.7	0.2	0.2	0.4
10	1	4	24	10	0.3	10	20	6	5	1	3	4	3	0	6	-18	-17	-17	-21	-14	0.2	-17	0.3	-18	0.6	0.2	0.3	0.4
10	1	5	190	10	0.3	10	30	12	13	2	3	3	5	0	38	-19	-17	-15	-19	-15	0.3	-16	0.4	-19	0.7	0.3	0.4	0.4
10	2	5	150	10	0.3	10	35	10	11	2	4	2	5	0	30	-17	-18	-15	-21	-12	0.3	-15	0.4	-17	0.7	0.3	0.3	0.5
10	1	12	72	10	0.3	10	15	6	5	1	5	4	5	0	6	-16	-15	-13	-16	-12	0.3	-12	0.3	-16	0.6	0.3	0.3	0.4
10	3	24	240	10	0.3	10	15	8	7	1	4	1	7	0	10	-18	-17	-13	-18	-14	0.3	-14	0.4	-17	0.6	0.4	0.4	0.5
10	1	40	1000	10	0.3	10	25	12	13	2	4	3	6	0	25	-15	-15	-11	-16	-12	0.3	-12	0.3	-15	0.7	0.4	0.5	0.5
11	2	3	15	10	0.3	10	6	3	3	1	4	3	3	0	5	-26	-25	-22	-26	-22	0.3	-22	0.4	-25	0.4	0.4	0.4	0.5
11	3	14	308	4	0.3	10	35	10	12	2	3		6	0	22	-16	-15	-12	-16	-12	0.4	-12	0.3	-17	0.6	0.2	0.4	0.3
13	1	4	32	10	0.3	10	15	6	6	1	4	4	5	0	8	-16	-13	-11	-14	-11	0.3	-11	0.2	-16	0.4	0.2	0.4	0.2
13	1	6	24	10	0.3	10	20	6	6	1	4	4	5	0	4	-18	-19	-14	-21	-15	0.2	-15	0.4	-18	0.6	0.3	0.3	0.5
13	1	6	36	10	0.3	10	20	6	5	1	4	1	4	0	6	-21	-16	-17	-22	-13	0.2	-17	0.2	-20	0.6	0.2	0.3	0.3
13	2	19	380	10	0.3	10	25	10	11	2	5	1	9	0	20	-16	-18	-14	-19	-14	0.3	-14	0.4	-17	0.6	0.4	0.4	0.5
13	2	34	1020	10	0.3	10	35	10	11	2	2	3	9	0	30	-15	-16	-11	-16	-13	0.4	-12	0.4	-14	0.7	0.5	0.5	0.5
14	1	12	168	10	0.3	10	30	10	9	2	4	1	5	0	14	-18	-16	-14	-19	-12	0.2	-15	0.3	-18	0.5	0.2	0.3	0.4
15	3	3	66	4	0.3	10	35	12	12	2	1		3	0	22	-17	-15	-13	-16	-13	0.3	-12	0.4	-18	0.7	0.1	0.4	0.4
15	1	3	18	10	0.3	10	15	4	5	1	4	2	6	0	6	-18	-18	-13	-20	-14	0.2	-15	0.4	-18	0.6	0.4	0.3	0.5
15	3	17	204	4	0.3	10	25	8	8	2	4	1	8	0	12	-15	-13	-11	-15	-11	0.2	-11	0.4	-15	0.4	0.4	0.3	0.5
15	1	29	174	10	0.3	10	20	6	5	1	4	2	5	0	6	-18	-17	-14	-18	-14	0.3	-14	0.4	-18	0.6	0.3	0.3	0.4
15	1	30	60	10	0.3	10	5	2	3	1	2	3	5	0	2	-15	-14	-10	-15	-11	0.4	-11	0.5	-15	0.7	0.4	0.5	0.6
16	3	12	564	10	0.3	10	40	14	15	2	2		5	0	47	-16	-14	-11	-14	-11	0.3	-11	0.5	-16	0.5	0.3	0.4	0.5
16	2	18	396	10	0.3	10	35	12	12	2	4	3	5	0	22	-17	-19	-12	-21	-12	0.3	-14	0.3	-17	0.7	0.7	0.5	0.3
16	1	18	216	10	0.3	10	30	8	8	2	4	4	2	0	12	-18	-20	-15	-21	-16	0.2	-16	0.3	-18	0.7	0.3	0.3	0.5
16	1	18	216	10	0.3	10	30	8	8	2	4	4	2	0	12	-18	-20	-15	-21	-16	0.2	-16	0.3	-18	0.7	0.3	0.3	0.5
17	1	6	18	10	0.3	10	10	2	3	1	3	3	6	0	3	-18	-18	-14	-20	-14	0.2	-14	0.5	-17	0.7	0.3	0.3	0.6
17	2	8	160	10	0.3	10	20	8	11	1	3	2	5	0	20	-14	-17	-10	-18	-12	0.3	-11	0.4	-14	0.7	0.4	0.4	0.7
18	1	10	80	10	0.3	10	20	6	6	1	4	2	2	0	8	-18	-17	-15	-18	-15	0.2	-15	0.4	-18	0.6	0.3	0.3	0.5
18	1	24	240	10	0.3	10	25	8	7	2	4	2	3	0	10	-17	-15	-13	-18	-13	0.2	-14	0.2	-16	0.6	0.2	0.3	0.2
18	1	24	240	10	0.3	10	25	8	7	2	4	2	3	0	10	-17	-15	-13	-18	-13	0.2	-14	0.2	-16	0.6	0.2	0.3	0.2
19	1	5	85	10	0.3	10	30	10	10	2	5	1	3	0	17	-18	-16	-15	-19	-13	0.3	-16	0.2	-17	0.6	0.3	0.3	0.2
19	1	7	119	10	0.3	10	25	10	10	2	5	2	6	0	17	-18	-20	-20	-25	-16	0.1	-20	0.2	-18	0.7	0.1	0.2	0.3
21	1	5	20	10	0.3	10	10	2	4	1	4	1	6	0	4	-18	-16	-13	-17	-15	0.3	-14	0.4	-18	0.6	0.4	0.4	0.5
26	1	7	14	10	0.3	10	5	3	3	1	2	3	5	0	2	-16	-14	-10	-14	-11	0.6	-11	0.5	-16	0.7	0.8	0.7	0.6
1	1	7	182	10	0.4	10	25	10	10	2	4	1	8	0	26	-16	-15	-11	-16	-12	0.3	-12	0.4	-16	0.6	0.4	0.4	0.6
1	1	15	390	10	0.4	10	20	8	10	1	5	1	5	0	26	-16	-15	-12	-17	-11	0.3	-13	0.3	-16	0.5	0.2	0.4	0.4
1	1	15	390	10	0.4	10	20	8	10	1	5	1	5	0	26	-16	-15	-12	-17	-11	0.3	-13	0.3	-16	0.5	0.2	0.4	0.4
1	1	15	390	10	0.4	10	20	8	10	1	5	1	5	0	26	-16	-15	-12	-17	-11	0.3	-13	0.3	-16	0.5	0.2	0.4	0.4
1	3	15	270	10	0.4	10	20	8	8	1	4	3	5	0	18	-16	-16	-11	-17	-11	0.2	-11	0.4	-16	0.4	0.4	0.3	0.5
1	1	19	570	10	0.4	10	25	10	11	2	2	1	7	0	30	-15	-13	-10	-13	-11	0.2	-10	0.3	-15	0.6	0.2	0.2	0.4
1	3	22	726	4	0.4	10	35	14	12	2	4	3	8	0	33	-15	-14	-10	-14	-11	0.1	-10	0.2	-15	0.3	0.2	0.2	0.2
1	1	26	390	10	0.4	10	20	6	7	1	5	1	5	0	15	-16	-13	-12	-15	-11	0.3	-12	0.2	-16	0.6	0.2	0.3	0.2
1	3	52	1716	10	0.4	10	25	10	12	2	3	3	5	0	33	-15	-13	-10	-14	-11	0.3	-11	0.4	-15	0.6	0.4	0.3	0.4
1	1	53	1749	10	0.4	10	25	11	12	2	4	3	5	0	33	-15	-14	-11	-15	-12	0.3	-12	0.6	-15	0.6	0.3	0.3	0.6
1	3	57	2166	10	0.4	10	35	13	13	2	4	3	5	0	38	-15	-14	-11	-14	-11	0.2	-11	0.4	-15	0.4	0.4	0.3	0.5
1	3	81	2106	10	0.4	10	25	10	10	2	4	1	5	0	26	-15	-14	-11	-15	-12	0.4	-12	0.4	-15	0.6	0.4	0.4	0.4
2	1	4	112	10	0.4	10	20	6	9	1	3	1	5	0	28	-21	-21	-19	-24	-19	0.2	-20	0.2	-20	0.5	0.2	0.2	0.3
2	1	4	60	10	0.4	10	30	8	7	2	4	1	3	0	15	-20	-18	-18	-25	-16	0.2	-20	0.2	-20	0.6	0.2	0.2	0.3
2	1	9	270	10	0.4	10	25	12	11	2	4	3	5	0	30	-17	-18	-12	-20	-14	0.2	-14	0.3	-17	0.4	0.3	0.3	0.5
2	1	10	350	10	0.4	10	40	10	10	2	3	3	5	0	35	-18	-19	-15	-19	-15	0.2	-15	0.4	-18	0.7	0.3	0.3	0.5
2	1	10	210	10	0.4	10	30	10	9	2	4	3	5	0	21	-16	-16	-13	-18	-12	0.3	-13	0.4	-17	0.5	0.3	0.4	0.5
2	1	25	1100	10	0.4	10	25	10	12	2	4	4	5	0	44	-16	-14	-12	-16	-9	0.2	-11	0.3	-16	0.5	0.2	0.3	0.4
2	3	36	648	4	0.4	10	25	8	8	2	4	1	5	0	18	-16	-14	-11	-14	-12	0.4	-12	0.4	-16	0.6	0.5	0.4	0.4
2	3	37	666	10	0.4	10	15	6	8	1	5	3	5	0	18	-15	-13	-10	-14	-11	0.3	-11	0.4	-16	0.5	0.4	0.3	0.4
2	2	39	1170	10	0.4	10	30	10	11	2	5	1	5	0	30	-16	-14	-12	-15	-12	0.2	-12	0.4	-16	0.5	0.3	0.3	0.5
2	3	52	2652	10	0.4	10	35	16	16	2	5	4	8	0	51	-16	-13	-11	-13	-11	0.3	-11	0.4	-16	0.4	0.4	0.3	0.4
3	1	3	36	10	0.4	10	10	6	6	1	5	1	5	0	12	-17	-15	-13	-17	-12	0.4	-14	0.4	-17	0.6	0.4	0.4	0.3
3	1	6	36	10	0.4	10	15	4	4	1	4	1	5	0	6	-19	-14	-18	-19	-12	0.2	-16	0.3	-20	0.4	0.2	0.2	0.3
3	1	13	156	10	0.4	10	15	6	6	1	5	4	5	0	12	-18	-20	-17	-22	-16	0.2	-16	0.4	-18	0.7	0.2	0.2	0.5
3	1	13	156	10	0.4	10	15	6	6	1	5	4	5	0	12	-18	-20	-17	-22	-16	0.2	-16	0.4	-18	0.7	0.2	0.2	0.5
3	3	20	660	10	0.4	10	30	12	12	2	4	1	5	0	33	-15	-14	-11	-14	-11	0.3	-10	0.4	-15	0.5	0.4	0.4	0.4
3	3	21	798	10	0.4	10	35	12	13	2	3		6	0	38	-15	-13	-11	-15	-11	0.3	-11	0.3	-16	0.6	0.3	0.4	0.3
3	1	38	798	10	0.4	10	25	8	9	2	3	4	5	0	21	-15	-13	-11	-14	-11	0.3	-11	0.5	-15	0.6	0.2	0.3	0.6
3	2	41	1804	10	0.4	10	40	12	12	2	2	2	8	0	44	-16	-15	-11	-16	-12	0.3	-12	0.4	-16	0.6	0.4	0.4	0.5
4	1	3	36	10	0.4	10	15	6	6	1	3	3	5	0	12	-19	-15	-16	-19	-13	0.2	-16	0.3	-19	0.7	0.2	0.2	0.3
4	1	5	150	10	0.4	10	35	12	11	2	4	4	6	0	30	-17	-14	-11	-17	-12	0.3	-12	0.2	-16	0.6	0.3	0.5	0.2
4	1	5	90	10	0.4	10	20	8	8	1	4	1	6	0	18	-19	-16	-16	-21	-14	0.2	-17	0.3	-19	0.5	0.3	0.3	0.3
4	3	6	156	10	0.4	10	25	10	10	2	5	2	8	0	26	-16	-16	-12	-18	-13	0.2	-14	0.4	-17	0.6	0.3	0.3	0.5
4	3	13	429	10	0.4	10	25	10	12	2	3	1	5	0	33	-15	-14	-10	-14	-12	0.3	-11	0.4	-15	0.6	0.4	0.3	0.4
4	3	18	216	10	0.4	10	15	6	5	1	4	2	5	0	12	-19	-22	-17	-22	-17	0.2	-17	0.4	-19	0.7	0.3	0.3	0.5
4	2	20	240	10	0.4	10	20	6	6	1	4	1	5	0	12	-20	-20	-19	-22	-16	0.2	-16	0.4	-20	0.7	0.3	0.2	0.5
4	3	21	987	10	0.4	10	40	16	15	2	5	4	2	0	47	-15	-13	-11	-14	-12	0.3	-11	0.4	-15	0.5	0.4	0.3	0.5
4	2	31	1302	10	0.4	10	35	12	14	2	3	3	8	0	42	-15	-16	-11	-18	-11	0.2	-12	0.3	-15	0.7	0.4	0.3	0.4
4	2	40	840	10	0.4	10	30	8	9	2	4	3	5	0	21	-17	-19	-14	-20	-14	0.3	-14	0.4	-17	0.7	0.4	0.4	0.6
4	3	48	1584	4	0.4	10	35	12	12	2	2		5	0	33	-17	-17	-13	-18	-14	0.3	-13	0.4	-18	0.6	0.4	0.4	0.5
5	1	4	84	10	0.4	10	30	10	9	2	4	3	7	0	21	-17	-13	-13	-16	-11	0.4	-13	0.3	-18	0.7	0.2	0.4	0.2
5	2	4	20	10	0.4	10	5	2	3	1	3	2	8	0	5	-17	-17	-12	-20	-13	0.3	-14	0.4	-16	0.7	0.5	0.5	0.5
5	2	6	210	10	0.4	10	25	8	10	2	4	1	4	0	35	-21	-19	-16	-22	-16	0.2	-19	0.2	-21	0.6	0.3	0.3	0.3
5	3	6	108	10	0.4	10	15	7	8	1	3	1	5	0	18	-16	-14	-11	-14	-12	0.3	-11	0.5	-16	0.6	0.4	0.3	0.4
5	1	7	105	10	0.4	10	25	8	7	2	4	3	5	0	15	-17	-14	-15	-17	-12	0.2	-14	0.2	-17	0.6	0.2	0.3	0.2
5	3	9	180	10	0.4	10	20	8	7	1	4	1	5	0	20	-16	-17	-12	-16	-14	0.3	-13	0.4	-16	0.6	0.3	0.4	0.4
5	3	12	288	10	0.4	10	20	8	8	1	4	1	5	0	24	-16	-22	-13	-21	-13	0.2	-12	0.3	-16	0.7	0.3	0.3	0.6
5	1	12	216	10	0.4	10	25	8	8	2	5	3	6	0	18	-18	-19	-15	-21	-15	0.2	-16	0.4	-17	0.7	0.3	0.3	0.5
5	1	18	378	10	0.4	10	20	8	9	1	5	3	5	0	21	-17	-20	-16	-21	-16	0.2	-15	0.4	-17	0.7	0.3	0.3	0.6
5	1	19	494	10	0.4	10	25	11	10	2	4	3	2	0	26	-18	-20	-14	-21	-15	0.2	-16	0.2	-18	0.5	0.2	0.2	0.4
5	2	21	378	10	0.4	10	20	8	8	1	5	2	6	0	18	-17	-17	-13	-19	-13	0.2	-13	0.3	-17	0.6	0.3	0.3	0.5
5	1	26	468	10	0.4	10	20	7	8	1	4	1	5	0	18	-15	-13	-11	-14	-11	0.3	-11	0.6	-15	0.6	0.2	0.3	0.6
5	1	27	486	10	0.4	10	25	8	8	2	4	3	3	0	18	-16	-14	-11	-15	-11	0.2	-10	0.2	-16	0.5	0.2	0.3	0.2
6	2	3	54	10	0.4	10	25	8	8	2	5	1	6	0	18	-16	-17	-10	-20	-12	0.3	-14	0.4	-16	0.7	0.5	0.4	0.6
6	1	7	126	10	0.4	10	20	8	8	1	4	4	5	0	18	-16	-13	-11	-14	-10	0.3	-12	0.2	-15	0.4	0.2	0.3	0.2
6	1	11	88	10	0.4	10	8	4	4	1	4	5	6	0	8	-16	-14	-12	-16	-11	0.3	-12	0.3	-16	0.5	0.3	0.4	0.3
6	2	16	416	10	0.4	10	25	8	10	2	5	1	4	0	26	-21	-19	-19	-23	-17	0.2	-19	0.2	-21	0.6	0.2	0.2	0.3
6	3	21	504	10	0.4	10	20	8	8	1	4	1	8	0	24	-16	-15	-11	-15	-13	0.3	-12	0.4	-14	0.7	0.3	0.4	0.5
6	1	27	810	10	0.4	10	30	12	11	2	4	3	5	0	30	-16	-14	-11	-15	-12	0.2	-11	0.3	-16	0.3	0.3	0.2	0.3
7	1	4	48	10	0.4	10	15	6	6	1	2	3	5	0	12	-16	-19	-17	-22	-14	0.2	-17	0.3	-16	0.7	0.2	0.4	0.4
7	1	5	45	10	0.4	10	20	6	5	1	3	2	2	0	9	-17	-15	-15	-18	-11	0.2	-13	0.3	-17	0.7	0.2	0.3	0.4
7	1	6	108	10	0.4	10	25	8	8	2	4	3	2	0	18	-17	-14	-13	-16	-12	0.2	-12	0.2	-17	0.6	0.2	0.3	0.3
7	1	34	952	10	0.4	10	25	8	9	2	4	3	3	0	28	-17	-17	-13	-17	-13	0.3	-13	0.5	-16	0.6	0.3	0.3	0.5
7	2	42	1260	10	0.4	10	30	10	11	2	3	1	8	0	30	-18	-18	-17	-20	-15	0.3	-16	0.4	-18	0.7	0.4	0.3	0.4
7	1	65	1365	10	0.4	10	20	8	9	1	3	3	8	0	21	-16	-16	-12	-16	-13	0.3	-13	0.4	-16	0.6	0.5	0.4	0.5
8	1	3	18	10	0.4	10	10	2	4	1	3	4	5	0	6	-17	-21	-17	-24	-15	0.3	-17	0.4	-17	0.7	0.3	0.3	0.5
8	1	5	90	10	0.4	10	30	8	8	2	4	3	5	0	18	-16	-15	-18	-15	-12	0.2	-11	0.4	-16	0.4	0.3	0.3	0.5
8	1	6	90	10	0.4	10	15	6	7	1	5	1	5	0	15	-16	-17	-13	-18	-13	0.2	-13	0.3	-16	0.4	0.2	0.2	0.5
8	1	9	315	10	0.4	10	25	10	10	2	4	3	5	0	35	-15	-15	-10	-15	-10	0.3	-9	0.4	-15	0.6	0.4	0.3	0.6
8	1	9	108	10	0.4	10	20	6	6	1	4	1	6	0	12	-16	-17	-13	-17	-14	0.3	-13	0.5	-16	0.7	0.3	0.4	0.6
8	3	10	620	10	0.4	10	40	16	15	2	3		6	0	62	-15	-13	-10	-13	-11	0.3	-10	0.4	-15	0.4	0.2	0.4	0.4
8	1	11	66	10	0.4	10	10	4	4	1	4	3	5	0	6	-16	-16	-12	-18	-11	0.2	-12	0.3	-16	0.5	0.3	0.3	0.4
8	1	32	832	10	0.4	10	40	10	10	2	2	3	5	0	26	-15	-15	-10	-16	-10	0.4	-11	0.4	-15	0.7	0.5	0.5	0.5
8	1	36	432	10	0.4	10	15	6	6	1	4	1	5	0	12	-16	-14	-12	-16	-10	0.2	-13	0.2	-16	0.6	0.2	0.3	0.2
8	1	42	378	10	0.4	10	20	6	5	1	4	4	6	0	9	-17	-18	-14	-19	-14	0.2	-14	0.4	-17	0.5	0.3	0.3	0.6
9	1	13	234	10	0.4	10	20	7	8	1	4	1	5	0	18	-16	-14	-11	-16	-12	0.3	-13	0.4	-16	0.6	0.5	0.4	0.4
9	2	14	252	10	0.4	10	20	8	8	1	4	4	9	0	18	-19	-17	-18	-21	-15	0.2	-17	0.3	-19	0.5	0.2	0.2	0.4
9	3	18	360	10	0.4	10	20	8	7	1	4	5	5	0	20	-19	-19	-15	-21	-16	0.2	-16	0.2	-18	0.5	0.3	0.3	0.3
9	3	39	1287	4	0.4	10	35	13	12	2	4	1	5	0	33	-16	-14	-12	-15	-12	0.3	-12	0.4	-16	0.5	0.5	0.4	0.5
9	2	46	1610	10	0.4	10	25	6	10	2	3	1	5	0	35	-16	-15	-12	-16	-13	0.3	-13	0.4	-16	0.6	0.4	0.4	0.5
10	1	4	60	10	0.4	10	30	8	7	2	4	1	2	0	15	-15	-14	-14	-17	-10	0.2	-12	0.2	-15	0.7	0.2	0.3	0.3
10	3	7	210	4	0.4	10	30	10	11	2	4		5	0	30	-18	-20	-15	-20	-16	0.3	-15	0.4	-18	0.7	0.3	0.3	0.5
10	3	7	182	10	0.4	10	20	10	10	1	5	2	8	0	26	-18	-21	-16	-24	-14	0.1	-17	0.3	-18	0.7	0.2	0.2	0.5
10	1	7	196	10	0.4	10	25	8	9	2	4	2	5	0	28	-18	-17	-14	-19	-14	0.3	-15	0.5	-18	0.6	0.4	0.3	0.6
10	2	10	440	10	0.4	10	25	8	12	2	4	1	8	0	44	-16	-16	-12	-18	-12	0.2	-13	0.4	-16	0.6	0.4	0.3	0.6
10	1	15	525	10	0.4	10	30	8	10	2	3	4	5	0	35	-20	-20	-17	-22	-17	0.3	-19	0.4	-20	0.5	0.3	0.3	0.5
10	2	15	315	10	0.4	10	25	8	9	2	4	1	6	0	21	-20	-21	-18	-24	-16	0.2	-19	0.3	-20	0.7	0.2	0.2	0.3
10	1	16	448	10	0.4	10	35	6	9	2	4	3	5	0	28	-15	-15	-11	-15	-12	0.3	-11	0.4	-15	0.7	0.4	0.4	0.5
10	1	25	950	10	0.4	10	30	14	13	2	4	1	5	0	38	-16	-14	-11	-15	-12	0.2	-12	0.4	-15	0.5	0.4	0.3	0.3
11	2	3	132	10	0.4	10	25	10	12	2	2	1	2	0	44	-19	-26	-18	-26	-21	0.2	-18	0.2	-19	0.8	0.4	0.2	0.2
11	2	5	130	10	0.4	10	30	8	10	2	4	1	4	0	26	-15	-17	-11	-18	-13	0.3	-13	0.4	-15	0.7	0.4	0.5	0.6
11	2	12	216	10	0.4	10	25	8	8	2	4	2	6	0	18	-16	-16	-11	-16	-11	0.3	-10	0.7	-16	0.7	0.5	0.4	0.8
11	2	34	952	10	0.4	10	20	6	9	1	3	1	8	0	28	-17	-15	-12	-16	-13	0.3	-13	0.4	-17	0.6	0.4	0.4	0.5
11	1	45	1350	10	0.4	10	25	10	11	2	4	3	5	0	30	-15	-14	-11	-14	-11	0.4	-11	0.5	-15	0.6	0.5	0.4	0.5
12	1	14	210	10	0.4	10	30	8	7	2	4	4	5	0	15	-17	-20	-16	-20	-15	0.2	-15	0.4	-17	0.7	0.3	0.3	0.6
12	1	27	702	10	0.4	10	30	10	10	2	4	1	6	0	26	-16	-14	-11	-16	-11	0.3	-12	0.2	-16	0.6	0.3	0.4	0.3
13	2	18	540	10	0.4	10	30	10	11	2	2	3	6	0	30	-18	-17	-14	-19	-14	0.2	-14	0.4	-18	0.7	0.3	0.3	0.5
13	2	20	420	10	0.4	10	25	8	9	2	3	1	6	0	21	-14	-15	-11	-16	-10	0.2	-10	0.4	-14	0.7	0.4	0.3	0.6
13	1	21	882	10	0.4	10	35	16	14	2	3	1	7	0	42	-15	-14	-11	-14	-12	0.4	-11	0.6	-15	0.6	0.4	0.3	0.6
14	2	4	20	10	0.4	10	10	4	3	1	5	2	5	0	5	-16	-15	-10	-16	-11	0.4	-10	0.6	-16	0.6	0.5	0.5	0.7
14	1	6	72	10	0.4	10	10	3	5	1	2	3	5	0	12	-19	-20	-18	-23	-15	0.2	-18	0.3	-19	0.6	0.2	0.2	0.3
15	2	4	20	10	0.4	10	10	2	3	1	4	3	6	0	5	-17	-15	-11	-16	-12	0.4	-12	0.5	-17	0.6	0.6	0.5	0.5
15	1	6	90	10	0.4	10	30	8	7	2	4	1	5	0	15	-17	-14	-13	-16	-11	0.3	-13	0.3	-17	0.5	0.2	0.3	0.3
15	1	10	260	10	0.4	10	25	10	10	2	5	2	8	0	26	-16	-17	-13	-19	-12	0.2	-12	0.4	-16	0.7	0.3	0.3	0.5
15	1	11	55	10	0.4	10	10	2	3	1	3	4	7	0	5	-17	-17	-14	-18	-14	0.2	-14	0.5	-17	0.7	0.4	0.3	0.6
16	2	3	78	10	0.4	10	30	10	10	2	4	1	5	0	26	-14	-15	-11	-15	-12	0.2	-12	0.4	-14	0.6	0.3	0.3	0.5
16	1	4	24	10	0.4	10	10	4	4	1	5	1	5	0	6	-20	-24	-19	-25	-19	0.2	-21	0.2	-20	0.5	0.2	0.3	0.5
16	1	4	24	10	0.4	10	10	4	4	1	5	1	5	0	6	-20	-24	-19	-25	-19	0.2	-21	0.2	-20	0.5	0.2	0.3	0.5
16	1	5	130	10	0.4	10	30	10	10	2	4	2	2	0	26	-18	-17	-18	-22	-12	0.2	-16	0.3	-20	0.5	0.2	0.3	0.4
16	1	15	270	10	0.4	10	15	6	8	1	4	2	6	0	18	-17	-20	-16	-21	-15	0.3	-16	0.4	-17	0.6	0.3	0.3	0.5
16	2	20	600	10	0.4	10	35	10	11	2	2	4	6	0	30	-15	-16	-11	-17	-12	0.4	-12	0.4	-15	0.7	0.5	0.5	0.6
16	2	27	891	10	0.4	10	35	12	12	2	4	1	6	0	33	-15	-14	-12	-15	-12	0.2	-12	0.3	-15	0.5	0.3	0.3	0.4
17	1	10	260	10	0.4	10	30	10	10	2	3	3	5	0	26	-16	-15	-11	-16	-13	0.4	-12	0.5	-16	0.7	0.6	0.5	0.5
18	1	21	441	10	0.4	10	20	8	9	1	4	2	6	0	21	-17	-17	-14	-18	-14	0.3	-14	0.5	-17	0.6	0.4	0.4	0.6
18	1	34	612	10	0.4	10	25	8	8	2	4	1	2	0	18	-16	-15	-13	-17	-12	0.4	-13	0.3	-16	0.6	0.3	0.4	0.3
18	1	34	612	10	0.4	10	25	8	8	2	4	1	2	0	18	-16	-15	-13	-17	-12	0.4	-13	0.3	-16	0.6	0.3	0.4	0.3
19	1	3	45	10	0.4	10	20	8	7	1	4	3	3	0	15	-16	-16	-11	-19	-11	0.3	-13	0.2	-15	0.3	0.3	0.4	0.5
19	1	7	105	10	0.4	10	20	8	7	1	4	2	3	0	15	-16	-15	-12	-18	-11	0.3	-13	0.2	-16	0.6	0.2	0.4	0.4
19	1	15	270	10	0.4	10	25	8	8	2	4	1	6	0	18	-17	-17	-16	-19	-14	0.2	-15	0.3	-17	0.6	0.2	0.2	0.3
21	1	7	147	10	0.4	10	25	8	9	2	5	3	5	0	21	-16	-15	-15	-16	-13	0.2	-13	0.4	-16	0.3	0.3	0.3	0.5
21	1	25	375	10	0.4	10	25	8	7	2	5	1	2	0	15	-16	-15	-13	-17	-12	0.4	-13	0.3	-16	0.6	0.3	0.4	0.3
22	1	5	90	10	0.4	10	25	8	8	2	5	4	3	0	18	-16	-15	-13	-16	-13	0.3	-12	0.3	-17	0.5	0.3	0.4	0.3
24	1	3	45	10	0.4	10	30	8	7	2	4	1	5	0	15	-18	-13	-11	-14	-10	0.3	-11	0.2	-17	0.5	0.2	0.4	0.2
30	1	5	60	10	0.4	10	20	6	6	1	5	3	3	0	12	-18	-14	-12	-17	-12	0.2	-13	0.2	-18	0.6	0.2	0.3	0.3
1	1	6	240	10	0.5	10	25	10	11	2	4	2	6	0	40	-17	-17	-13	-18	-12	0.3	-13	0.6	-16	0.7	0.4	0.4	0.6
1	1	6	240	10	0.5	10	25	10	11	2	4	2	6	0	40	-17	-17	-13	-18	-12	0.3	-13	0.6	-16	0.7	0.4	0.4	0.6
1	1	7	168	10	0.5	10	20	6	8	1	4	1	5	0	24	-18	-15	-15	-18	-11	0.2	-14	0.2	-18	0.6	0.2	0.3	0.3
1	1	15	525	10	0.5	10	30	10	10	2	4	3	2	0	35	-15	-16	-11	-19	-10	0.4	-12	0.3	-16	0.6	0.5	0.6	0.5
1	0	24	840		0.5	10	25	10	10	2	5	1	3	0	35	-15	-15	-11	-16	-12	0.4	-11	0.4	-15	0.7	0.2	0.5	0.4
1	2	24	672	10	0.5	10	30	10	9	2	4	3	8	0	28	-16	-16	-11	-16	-11	0.2	-11	0.4	-16	0.4	0.2	0.2	0.5
1	3	33	792	10	0.5	10	20	8	8	1	4	1	5	0	24	-16	-16	-11	-16	-12	0.3	-11	0.4	-15	0.6	0.4	0.4	0.5
1	1	36	1008	10	0.5	10	20	8	9	1	3	1	5	0	28	-15	-14	-11	-14	-12	0.4	-11	0.5	-15	0.6	0.5	0.4	0.5
1	1	46	2024	10	0.5	10	30	11	12	2	4	3	5	0	44	-15	-13	-10	-13	-11	0.2	-10	0.5	-15	0.5	0.2	0.2	0.6
1	3	48	2112	10	0.5	10	35	11	12	2	2	2	5	0	44	-15	-14	-11	-14	-12	0.3	-11	0.4	-15	0.6	0.4	0.3	0.4
1	1	95	4750	10	0.5	10	35	14	13	2	3	3	5	0	50	-15	-14	-11	-15	-12	0.4	-12	0.5	-15	0.6	0.4	0.4	0.5
2	1	3	105	10	0.5	10	30	10	10	2	4	1	7	0	35	-18	-16	-12	-17	-14	0.4	-14	0.6	-18	0.6	0.5	0.5	0.6
2	1	7	140	10	0.5	10	15	6	7	1	4	4	6	0	20	-17	-18	-12	-19	-14	0.1	-13	0.3	-18	0.5	0.2	0.2	0.4
2	1	11	385	10	0.5	10	30	10	10	2	4	4	2	0	35	-16	-15	-13	-17	-12	0.3	-13	0.3	-17	0.5	0.3	0.3	0.3
2	3	15	450	10	0.5	10	20	6	8	1	4	1	8	0	30	-17	-18	-12	-18	-14	0.2	-12	0.3	-16	0.5	0.3	0.3	0.5
2	3	17	952	10	0.5	10	25	10	12	2	3	2	7	0	56	-17	-16	-14	-18	-13	0.2	-14	0.4	-17	0.6	0.4	0.3	0.4
2	2	17	408	10	0.5	10	25	8	8	2	4	3	5	0	24	-16	-16	-13	-18	-11	0.3	-13	0.4	-16	0.6	0.4	0.4	0.6
2	2	18	900	10	0.5	10	35	10	11	2	3	1	5	0	50	-15	-14	-11	-15	-12	0.2	-12	0.4	-15	0.6	0.3	0.4	0.5
2	1	20	700	10	0.5	10	25	10	10	2	4	1	5	0	35	-14	-12	-10	-13	-10	0.2	-10	0.6	-15	0.5	0.2	0.2	0.6
2	1	26	1040	10	0.5	10	25	10	11	2	4	3	5	0	40	-15	-13	-10	-13	-11	0.2	-11	0.6	-15	0.6	0.2	0.3	0.6
2	1	28	1232	10	0.5	10	30	10	12	2	4	3	5	0	44	-14	-13	-10	-13	-11	0.2	-10	0.5	-15	0.6	0.3	0.2	0.5
2	3	28	700	10	0.5	10	20	6	7	1	4	3	5	0	25	-17	-17	-11	-17	-13	0.3	-12	0.5	-17	0.6	0.4	0.4	0.6
2	1	29	1015	10	0.5	10	25	12	10	2	4	3	5	0	35	-14	-14	-11	-14	-11	0.5	-11	0.5	-14	0.6	0.6	0.6	0.6
2	1	31	1085	10	0.5	10	20	8	10	1	4	3	5	0	35	-15	-14	-11	-14	-12	0.2	-11	0.5	-15	0.5	0.2	0.2	0.5
2	1	32	1120	10	0.5	10	30	10	10	2	4	4	3	0	35	-17	-15	-13	-17	-12	0.2	-13	0.2	-17	0.6	0.2	0.3	0.3
2	1	32	1120	10	0.5	10	30	10	10	2	4	4	3	0	35	-17	-15	-13	-17	-12	0.2	-13	0.2	-17	0.6	0.2	0.3	0.3
2	1	33	1320	10	0.5	10	25	10	11	2	3	3	5	0	40	-15	-14	-11	-14	-12	0.2	-12	0.4	-15	0.5	0.2	0.3	0.4
2	2	34	1700	10	0.5	10	20	6	11	1	3	1	8	0	50	-15	-19	-15	-22	-11	0.2	-14	0.3	-16	0.6	0.3	0.3	0.6
2	2	35	1960	10	0.5	10	30	8	12	2	2	3	5	0	56	-17	-16	-13	-18	-13	0.2	-14	0.3	-17	0.6	0.3	0.3	0.5
2	1	41	984	10	0.5	10	15	7	8	1	4	3	5	0	24	-15	-14	-11	-15	-12	0.4	-12	0.6	-15	0.7	0.4	0.5	0.6
2	3	51	2550	10	0.5	10	30	11	13	2	3	1	5	0	50	-16	-14	-11	-14	-12	0.3	-12	0.4	-16	0.6	0.4	0.3	0.4
2	1	67	4154	10	0.5	10	30	16	15	2	3	3	7	0	62	-15	-13	-10	-13	-10	0.4	-10	0.5	-15	0.6	0.3	0.4	0.5
3	2	4	176	10	0.5	10	25	6	10	2	4	2	5	0	44	-19	-18	-17	-24	-13	0.2	-17	0.3	-19	0.7	0.2	0.2	0.5
3	3	14	420	4	0.5	10	30	8	8	2	4	3	8	0	30	-17	-18	-13	-19	-15	0.3	-13	0.4	-16	0.5	0.3	0.4	0.5
3	3	18	1008	10	0.5	10	35	10	12	2	4	3	5	0	56	-15	-14	-11	-15	-12	0.2	-11	0.5	-15	0.6	0.3	0.3	0.6
3	3	25	750	4	0.5	10	30	8	8	2	4	1	5	0	30	-17	-17	-14	-19	-13	0.3	-14	0.4	-17	0.6	0.3	0.4	0.5
3	1	33	1320	10	0.5	10	30	12	11	2	3	3	5	0	40	-15	-14	-11	-14	-12	0.4	-12	0.6	-15	0.6	0.3	0.4	0.6
3	1	39	1365	10	0.5	10	25	9	10	2	4	3	5	0	35	-15	-12	-10	-13	-10	0.2	-10	0.5	-15	0.5	0.2	0.2	0.5
3	3	44	2200	10	0.5	10	35	11	13	2	2	3	5	0	50	-15	-14	-11	-14	-12	0.3	-11	0.4	-15	0.6	0.4	0.3	0.4
3	1	47	2632	10	0.5	10	30	14	14	2	3	1	8	0	56	-15	-13	-10	-13	-11	0.2	-10	0.4	-15	0.6	0.2	0.2	0.4
3	1	47	2068	10	0.5	10	30	11	12	2	4	1	5	0	44	-14	-13	-10	-13	-11	0.3	-11	0.7	-15	0.6	0.3	0.3	0.6
3	2	56	1960	10	0.5	10	25	8	10	2	3	4	5	0	35	-16	-17	-12	-17	-13	0.3	-12	0.5	-16	0.6	0.4	0.4	0.6
3	1	70	3080	10	0.5	10	30	11	12	2	2	3	6	0	44	-14	-13	-11	-14	-11	0.2	-11	0.4	-15	0.5	0.3	0.3	0.5
3	3	78	3900	10	0.5	10	35	12	13	2	3	3	5	0	50	-15	-14	-11	-14	-12	0.3	-11	0.4	-15	0.6	0.4	0.2	0.4
4	3	3	132	10	0.5	10	40	12	12	2	4		2	0	44	-21	-16	-17	-23	-14	0.2	-18	0.2	-21	0.6	0.2	0.2	0.3
4	1	3	120	10	0.5	10	30	10	11	2	3	4	5	0	40	-20	-19	-19	-23	-13	0.1	-18	0.2	-20	0.6	0.1	0.2	0.3
4	3	7	308	10	0.5	10	25	10	12	2	3	3	5	0	44	-15	-13	-11	-14	-12	0.4	-12	0.4	-15	0.6	0.5	0.3	0.4
4	2	8	352	10	0.5	10	20	6	10	1	4	2	5	0	44	-19	-19	-17	-22	-14	0.2	-17	0.3	-19	0.5	0.2	0.2	0.4
4	2	9	252	10	0.5	10	25	8	9	2	4	1	5	0	28	-15	-15	-10	-15	-12	0.3	-11	0.5	-14	0.6	0.5	0.5	0.6
4	1	12	192	10	0.5	10	20	6	6	1	4	1	7	0	16	-15	-13	-11	-15	-11	0.3	-11	0.2	-14	0.6	0.3	0.4	0.3
4	1	18	360	10	0.5	10	15	6	7	1	4	4	3	0	20	-16	-16	-15	-19	-11	0.2	-13	0.3	-16	0.6	0.3	0.3	0.4
4	1	35	1960	10	0.5	10	35	14	14	2	4	3	5	0	56	-15	-14	-11	-15	-12	0.3	-11	0.3	-15	0.6	0.4	0.4	0.4
4	3	35	1540	10	0.5	10	30	13	12	2	3	1	8	0	44	-16	-14	-11	-14	-11	0.3	-11	0.4	-15	0.5	0.4	0.4	0.4
4	3	35	1540	10	0.5	10	30	13	12	2	3	1	8	0	44	-16	-13	-11	-13	-11	0.3	-11	0.4	-15	0.4	0.4	0.4	0.4
4	1	52	1820	10	0.5	10	20	8	10	1	4	3	5	0	35	-15	-15	-11	-15	-12	0.3	-11	0.4	-15	0.6	0.5	0.3	0.4
4	3	75	3300	10	0.5	10	25	10	12	2	4	2	6	0	44	-15	-14	-11	-14	-12	0.3	-11	0.5	-15	0.6	0.5	0.3	0.4
4	1	90	3960	10	0.5	10	30	11	12	2	4	3	4	0	44	-14	-13	-11	-13	-11	0.2	-10	0.5	-15	0.6	0.3	0.3	0.6
4	1	97	2328	10	0.5	10	15	8	8	1	3	1	5	0	24	-15	-14	-11	-15	-12	0.4	-12	0.4	-15	0.7	0.5	0.4	0.4
5	1	3	84	10	0.5	10	25	10	9	2	5	4	6	0	28	-18	-18	-15	-19	-15	0.3	-15	0.5	-17	0.7	0.4	0.4	0.5
5	3	4	120	4	0.5	10	30	8	8	2	4	3	5	0	30	-17	-18	-12	-19	-14	0.3	-13	0.3	-16	0.7	0.4	0.5	0.5
5	1	10	350	10	0.5	10	20	6	9	1	4	1	5	0	35	-16	-17	-11	-18	-12	0.3	-12	0.3	-16	0.6	0.4	0.4	0.5
5	1	16	800	10	0.5	10	30	14	13	2	3	4	6	0	50	-14	-14	-11	-14	-11	0.2	-11	0.4	-15	0.6	0.3	0.3	0.5
5	2	28	1400	10	0.5	10	25	10	11	2	3	3	5	0	50	-16	-17	-12	-18	-13	0.2	-13	0.3	-16	0.7	0.3	0.3	0.5
5	0	44	2200		0.5	10	35	14	13	2	3	1	5	0	50	-15	-13	-11	-14	-10	0.3	-11	0.3	-15	0.6	0.2	0.3	0.3
5	1	45	1260	10	0.5	10	20	8	9	1	5	3	5	0	28	-17	-17	-14	-18	-14	0.2	-14	0.4	-17	0.6	0.3	0.3	0.5
5	1	60	2640	10	0.5	10	30	12	12	2	2	3	5	0	44	-15	-14	-11	-14	-12	0.3	-12	0.4	-15	0.6	0.4	0.4	0.4
5	1	70	3080	10	0.5	10	30	11	12	2	4	1	5	0	44	-15	-13	-10	-13	-11	0.3	-11	0.6	-15	0.5	0.2	0.3	0.6
5	1	71	2485	10	0.5	10	20	10	10	1	3	3	7	0	35	-15	-14	-10	-14	-11	0.3	-11	0.6	-15	0.7	0.3	0.4	0.6
5	1	72	3168	10	0.5	10	35	13	12	2	3	1	7	0	44	-15	-13	-10	-14	-11	0.3	-11	0.6	-15	0.6	0.3	0.3	0.6
5	1	73	2555	10	0.5	10	25	11	10	2	3	3	5	0	35	-15	-14	-11	-15	-12	0.4	-11	0.6	-15	0.7	0.4	0.5	0.6
6	2	5	125	10	0.5	10	20	6	7	1	4	4	5	0	25	-17	-17	-15	-22	-13	0.2	-17	0.3	-18	0.7	0.2	0.2	0.4
6	2	13	455	10	0.5	10	25	8	10	2	4	1	5	0	35	-23	-23	-20	-25	-18	0.3	-20	0.3	-23	0.5	0.3	0.4	0.5
6	2	24	1056	10	0.5	10	35	10	12	2	2	1	8	0	44	-15	-16	-11	-17	-12	0.3	-12	0.4	-15	0.7	0.4	0.4	0.5
6	1	30	1200	10	0.5	10	30	12	11	2	3	1	5	0	40	-15	-13	-11	-13	-11	0.3	-11	0.6	-15	0.6	0.2	0.3	0.6
6	1	33	1155	10	0.5	10	25	10	10	2	4	1	7	0	35	-17	-15	-13	-15	-13	0.2	-13	0.4	-17	0.5	0.2	0.2	0.4
6	1	50	2800	10	0.5	10	35	14	14	2	4	3	5	0	56	-15	-15	-11	-15	-12	0.3	-12	0.4	-14	0.7	0.4	0.4	0.5
6	3	52	2912	10	0.5	10	30	14	14	2	2	4	7	0	56	-15	-13	-11	-14	-11	0.3	-11	0.4	-16	0.5	0.4	0.4	0.4
6	1	53	2332	10	0.5	10	20	12	12	1	3	3	6	0	44	-15	-14	-11	-15	-12	0.3	-11	0.6	-15	0.7	0.3	0.4	0.6
7	1	3	60	10	0.5	10	15	6	7	1	4	1	5	0	20	-20	-15	-16	-17	-12	0.2	-14	0.2	-20	0.6	0.2	0.2	0.3
7	2	4	112	10	0.5	10	25	8	9	2	3	4	6	0	28	-29	-31	-23	-34	-23	0.2	-27	0.4	-29	0.6	0.3	0.2	0.5
7	2	4	140	10	0.5	10	20	6	9	1	3	1	5	0	35	-16	-15	-12	-16	-12	0.2	-12	0.3	-15	0.6	0.4	0.3	0.4
7	1	9	396	10	0.5	10	30	10	12	2	4	3	5	0	44	-18	-16	-13	-20	-13	0.2	-15	0.3	-18	0.6	0.4	0.3	0.4
7	3	18	540	4	0.5	10	30	8	8	2	4	4	6	0	30	-16	-14	-11	-14	-12	0.2	-12	0.4	-15	0.6	0.3	0.3	0.5
7	1	20	880	10	0.5	10	35	12	12	2	4	3	8	0	44	-18	-17	-13	-17	-13	0.3	-13	0.5	-17	0.4	0.3	0.3	0.6
7	3	48	2112	10	0.5	10	30	11	12	2	2	1	5	0	44	-15	-14	-11	-14	-11	0.3	-11	0.4	-15	0.6	0.4	0.3	0.4
7	3	82	4100	10	0.5	10	35	11	13	2	3	3	5	0	50	-16	-14	-11	-15	-12	0.4	-12	0.5	-16	0.6	0.5	0.4	0.4
7	1	147	4116	10	0.5	10	20	10	9	1	3	1	7	0	28	-15	-13	-10	-13	-11	0.2	-11	0.6	-15	0.6	0.2	0.2	0.6
8	3	5	280	10	0.5	10	40	12	12	2	4	4	5	0	56	-16	-15	-12	-15	-12	0.3	-12	0.4	-15	0.5	0.3	0.4	0.5
8	1	6	210	10	0.5	10	25	10	10	2	4	2	6	0	35	-20	-21	-18	-24	-15	0.1	-18	0.3	-20	0.7	0.2	0.2	0.4
8	2	7	350	10	0.5	10	25	6	11	2	4	3	5	0	50	-17	-22	-14	-23	-14	0.2	-14	0.3	-16	0.6	0.3	0.3	0.7
8	1	7	245	10	0.5	10	25	10	10	2	5	1	5	0	35	-14	-19	-12	-20	-10	0.2	-13	0.3	-14	0.8	0.3	0.3	0.6
8	2	10	440	10	0.5	10	25	8	10	2	4	2	5	0	44	-17	-18	-15	-20	-14	0.2	-16	0.4	-17	0.7	0.3	0.3	0.4
8	1	15	420	10	0.5	10	20	8	9	1	4	1	8	0	28	-17	-19	-14	-20	-13	0.2	-14	0.4	-17	0.6	0.2	0.2	0.5
8	2	18	1008	10	0.5	10	30	10	12	2	4	1	8	0	56	-16	-15	-12	-15	-12	0.2	-12	0.3	-16	0.6	0.3	0.3	0.4
8	1	18	360	10	0.5	10	10	6	7	1	5	1	5	0	20	-17	-13	-12	-15	-11	0.2	-12	0.2	-17	0.6	0.2	0.3	0.2
8	3	22	770	10	0.5	10	25	8	10	2	3	2	5	0	35	-16	-14	-12	-15	-13	0.3	-12	0.5	-16	0.6	0.4	0.4	0.5
8	2	24	840	10	0.5	10	25	10	10	2	4	2	6	0	35	-20	-17	-16	-21	-15	0.2	-17	0.3	-20	0.6	0.3	0.3	0.4
8	1	25	1100	10	0.5	10	35	13	12	2	3	3	8	0	44	-16	-15	-11	-15	-12	0.2	-12	0.3	-16	0.5	0.4	0.3	0.5
8	2	26	728	10	0.5	10	25	8	9	2	4	1	5	0	28	-17	-17	-12	-18	-13	0.3	-12	0.4	-16	0.6	0.4	0.4	0.6
8	3	26	624	10	0.5	10	20	8	8	1	4	4	5	0	24	-15	-14	-11	-15	-11	0.3	-11	0.4	-14	0.5	0.4	0.4	0.5
8	2	27	1350	10	0.5	10	30	10	11	2	5	1	2	0	50	-19	-18	-15	-20	-14	0.2	-15	0.3	-18	0.6	0.3	0.3	0.5
8	3	33	1452	10	0.5	10	35	12	12	2	4	2	9	0	44	-15	-15	-10	-15	-12	0.3	-11	0.5	-15	0.6	0.4	0.4	0.6
8	1	50	2500	10	0.5	10	35	14	13	2	3	3	5	0	50	-15	-14	-11	-14	-12	0.4	-12	0.6	-15	0.6	0.4	0.4	0.5
9	3	4	200	10	0.5	10	30	8	11	2	4	3	8	0	50	-15	-14	-11	-15	-11	0.2	-11	0.5	-15	0.6	0.4	0.3	0.6
9	2	10	350	10	0.5	10	25	8	10	2	4	1	5	0	35	-14	-15	-11	-15	-12	0.3	-11	0.4	-14	0.7	0.4	0.4	0.5
9	1	12	360	10	0.5	10	30	8	8	2	4	1	5	0	30	-17	-13	-13	-16	-11	0.2	-13	0.2	-17	0.4	0.2	0.3	0.2
9	2	12	300	10	0.5	10	15	6	7	1	4	3	5	0	25	-16	-17	-14	-19	-12	0.2	-13	0.4	-16	0.6	0.3	0.2	0.5
9	2	17	476	10	0.5	10	25	8	9	2	4	1	5	0	28	-16	-18	-15	-19	-13	0.2	-13	0.3	-16	0.7	0.4	0.3	0.5
9	2	17	408	10	0.5	10	25	8	8	2	5	1	2	0	24	-17	-17	-13	-17	-14	0.3	-13	0.4	-16	0.6	0.4	0.4	0.5
9	2	23	644	10	0.5	10	25	8	9	2	3	3	6	0	28	-14	-17	-11	-17	-14	0.4	-11	0.4	-14	0.7	0.4	0.5	0.4
9	3	24	1056	10	0.5	10	30	10	12	2	2	1	5	0	44	-15	-13	-10	-13	-11	0.3	-11	0.4	-15	0.5	0.4	0.3	0.4
9	1	26	780	10	0.5	10	30	10	8	2	4	4	8	0	30	-15	-14	-12	-16	-11	0.2	-12	0.2	-16	0.4	0.2	0.3	0.2
9	1	35	1400	10	0.5	10	25	10	11	2	4	3	9	0	40	-16	-16	-12	-17	-12	0.3	-12	0.4	-16	0.5	0.4	0.4	0.5
9	1	41	1804	10	0.5	10	30	13	12	2	3	3	5	0	44	-15	-14	-11	-14	-12	0.3	-12	0.5	-15	0.6	0.4	0.4	0.5
10	2	3	105	10	0.5	10	30	10	10	2	4	3	6	0	35	-16	-14	-12	-16	-12	0.2	-12	0.5	-16	0.6	0.4	0.3	0.5
10	3	4	140	10	0.5	10	30	10	10	2	4		5	0	35	-17	-17	-13	-18	-14	0.3	-14	0.5	-17	0.7	0.3	0.4	0.6
10	1	4	96	10	0.5	10	25	6	8	2	4	3	5	0	24	-17	-16	-13	-17	-13	0.2	-13	0.5	-17	0.7	0.4	0.3	0.6
10	2	12	420	10	0.5	10	30	10	10	2	4	1	8	0	35	-15	-15	-11	-16	-12	0.2	-11	0.3	-15	0.6	0.4	0.3	0.5
10	1	18	504	10	0.5	10	20	8	9	1	4	1	5	0	28	-17	-14	-13	-16	-12	0.3	-14	0.2	-16	0.5	0.2	0.4	0.2
10	1	20	700	10	0.5	10	25	8	10	2	4	1	5	0	35	-16	-13	-11	-15	-11	0.3	-12	0.2	-16	0.5	0.2	0.4	0.2
10	3	34	1700	10	0.5	10	35	12	13	2	3		7	0	50	-16	-14	-11	-15	-11	0.3	-11	0.3	-15	0.6	0.3	0.5	0.4
10	2	40	2240	10	0.5	10	25	8	12	2	3	3	5	0	56	-15	-16	-11	-17	-12	0.2	-12	0.4	-16	0.6	0.4	0.3	0.6
10	1	45	1800	10	0.5	10	25	12	11	2	2	3	5	0	40	-15	-14	-11	-14	-12	0.3	-11	0.5	-15	0.6	0.4	0.4	0.5
11	2	6	264	10	0.5	10	40	14	12	2	4	2	5	0	44	-19	-20	-17	-21	-16	0.2	-17	0.3	-19	0.6	0.4	0.3	0.4
11	1	7	105	10	0.5	10	15	5	5	1	4	2	3	0	15	-17	-19	-17	-23	-12	0.2	-16	0.2	-17	0.6	0.2	0.3	0.5
11	2	11	484	10	0.5	10	25	10	10	2	4	3	4	0	44	-18	-17	-16	-20	-14	0.3	-16	0.4	-18	0.7	0.4	0.4	0.4
11	2	11	484	10	0.5	10	25	10	10	2	4	3	4	0	44	-18	-17	-16	-20	-14	0.3	-16	0.4	-18	0.7	0.4	0.4	0.4
11	2	11	264	10	0.5	10	25	8	8	2	4	1	5	0	24	-17	-17	-14	-18	-14	0.3	-14	0.4	-17	0.7	0.5	0.5	0.5
11	1	12	528	10	0.5	10	20	10	12	1	5	1	5	0	44	-17	-15	-14	-17	-13	0.3	-14	0.2	-17	0.5	0.2	0.4	0.2
11	3	14	700	10	0.5	10	35	12	13	2	4		5	0	50	-17	-16	-13	-18	-12	0.2	-13	0.3	-17	0.6	0.3	0.3	0.4
11	3	18	900	10	0.5	10	30	13	13	2	3	4	5	0	50	-16	-14	-11	-14	-12	0.3	-11	0.3	-15	0.5	0.4	0.4	0.4
11	1	21	420	10	0.5	10	25	8	7	2	4	3	3	0	20	-16	-15	-12	-17	-12	0.2	-13	0.2	-16	0.6	0.3	0.3	0.3
11	1	50	1400	10	0.5	10	25	10	9	2	2	4	5	0	28	-15	-13	-10	-13	-11	0.4	-11	0.4	-15	0.6	0.4	0.4	0.4
11	0	96	4800		0.5	10	30	14	13	2	3	1	5	0	50	-15	-12	-11	-13	-10	0.3	-11	0.3	-15	0.5	0.1	0.3	0.3
12	2	5	140	10	0.5	10	25	8	9	2	4	1	5	0	28	-14	-16	-11	-15	-11	0.2	-11	0.4	-15	0.5	0.3	0.4	0.6
12	1	6	210	10	0.5	10	30	10	10	2	3	4	3	0	35	-19	-16	-16	-21	-14	0.2	-16	0.3	-19	0.5	0.2	0.3	0.3
12	1	23	460	10	0.5	10	25	8	7	2	4	3	7	0	20	-19	-19	-14	-22	-14	0.3	-16	0.3	-19	0.6	0.4	0.4	0.4
13	1	4	284	10	0.5	10	60	20	14	4	3	1	6	0	71	-16	-14	-11	-15	-12	0.3	-12	0.4	-16	0.5	0.3	0.4	0.4
13	2	10	350	10	0.5	10	20	6	9	1	4	1	5	0	35	-16	-16	-11	-17	-13	0.3	-12	0.3	-16	0.7	0.5	0.5	0.5
13	1	11	176	10	0.5	10	20	6	6	1	4	2	5	0	16	-17	-17	-13	-18	-13	0.3	-13	0.5	-17	0.7	0.4	0.3	0.6
13	3	15	450	4	0.5	10	30	8	8	2	4	2	5	0	30	-16	-14	-11	-14	-12	0.3	-11	0.5	-16	0.5	0.3	0.3	0.5
13	2	18	792	10	0.5	10	30	10	12	2	4	1	8	0	44	-15	-14	-11	-15	-12	0.3	-12	0.4	-15	0.6	0.4	0.4	0.5
13	1	18	630	10	0.5	10	20	8	10	1	5	1	5	0	35	-17	-15	-12	-17	-12	0.2	-14	0.2	-17	0.6	0.2	0.3	0.3
13	1	18	630	10	0.5	10	20	8	10	1	5	1	5	0	35	-17	-15	-12	-17	-12	0.2	-14	0.2	-17	0.6	0.2	0.3	0.3
15	1	7	245	10	0.5	10	25	10	10	2	4	2	6	0	35	-17	-18	-13	-18	-13	0.3	-13	0.5	-17	0.7	0.4	0.3	0.6
15	2	8	280	10	0.5	10	30	8	10	2	1	1	6	0	35	-14	-15	-11	-15	-13	0.3	-10	0.2	-15	0.7	0.3	0.5	0.3
15	1	8	280	10	0.5	10	25	10	10	2	4	2	6	0	35	-16	-15	-12	-16	-13	0.2	-12	0.5	-16	0.7	0.3	0.3	0.6
15	1	11	440	10	0.5	10	20	10	11	1	3	4	5	0	40	-16	-13	-11	-14	-11	0.3	-11	0.2	-17	0.6	0.3	0.4	0.3
15	1	17	408	10	0.5	10	20	6	8	1	4	1	5	0	24	-20	-15	-15	-19	-12	0.3	-15	0.2	-20	0.5	0.2	0.3	0.3
15	1	17	408	10	0.5	10	20	6	8	1	4	1	5	0	24	-20	-15	-15	-19	-12	0.3	-15	0.2	-20	0.5	0.2	0.3	0.3
16	1	9	252	10	0.5	10	20	8	9	1	5	1	5	0	28	-18	-16	-16	-20	-14	0.4	-17	0.3	-19	0.5	0.3	0.4	0.3
16	1	9	252	10	0.5	10	20	8	9	1	5	1	5	0	28	-18	-16	-16	-20	-14	0.4	-17	0.3	-19	0.5	0.3	0.4	0.3
16	1	9	216	10	0.5	10	20	8	8	1	4	2	5	0	24	-17	-13	-12	-16	-11	0.3	-14	0.2	-16	0.5	0.2	0.3	0.2
16	1	9	216	10	0.5	10	20	8	8	1	4	2	5	0	24	-17	-13	-12	-16	-11	0.3	-14	0.2	-16	0.5	0.2	0.3	0.2
16	1	12	288	10	0.5	10	15	6	8	1	4	1	5	0	24	-16	-14	-11	-15	-13	0.3	-12	0.4	-16	0.6	0.3	0.3	0.4
16	1	46	1840	10	0.5	10	40	12	11	2	4	3	7	0	40	-16	-14	-12	-16	-11	0.3	-13	0.2	-16	0.6	0.3	0.4	0.3
17	3	4	200	10	0.5	10	25	10	11	2	2	2	5	0	50	-19	-19	-15	-22	-15	0.2	-17	0.3	-19	0.6	0.2	0.2	0.4
17	1	6	264	10	0.5	10	20	10	12	1	5	1	5	0	44	-15	-13	-12	-14	-11	0.3	-12	0.2	-15	0.5	0.3	0.4	0.3
17	1	14	392	10	0.5	10	20	8	9	1	4	1	5	0	28	-18	-17	-15	-20	-12	0.3	-15	0.2	-18	0.5	0.2	0.3	0.3
18	1	3	132	10	0.5	10	30	10	10	2	4	2	5	0	44	-16	-16	-16	-17	-13	0.3	-12	0.4	-16	0.6	0.2	0.3	0.4
18	1	3	24	10	0.5	10	10	2	4	1	3	3	9	0	8	-19	-21	-16	-22	-17	0.3	-17	0.4	-19	0.6	0.3	0.3	0.4
18	1	20	700	10	0.5	10	30	10	10	2	4	2	2	0	35	-16	-14	-12	-16	-11	0.2	-13	0.2	-16	0.5	0.2	0.3	0.3
19	1	4	80	10	0.5	10	15	6	7	1	4	1	6	0	20	-18	-14	-13	-16	-13	0.3	-13	0.2	-18	0.5	0.2	0.4	0.2
19	1	5	120	10	0.5	10	25	8	8	2	5	1	8	0	24	-18	-17	-15	-20	-15	0.3	-17	0.4	-18	0.6	0.2	0.3	0.4
19	2	13	312	10	0.5	10	20	8	8	1	5	1	9	0	24	-17	-16	-12	-16	-13	0.4	-13	0.5	-16	0.6	0.4	0.5	0.6
25	1	13	455	10	0.5	10	20	10	10	1	5	4	5	0	35	-17	-14	-13	-17	-11	0.2	-13	0.2	-16	0.4	0.2	0.3	0.3
1	2	11	737	10	0.6	10	30	10	12	2	4	3	8	0	67	-18	-20	-13	-21	-14	0.3	-13	0.4	-17	0.7	0.5	0.4	0.5
1	3	16	1136	10	0.6	10	35	12	14	2	2	3	5	0	71	-15	-14	-11	-14	-12	0.3	-11	0.4	-15	0.5	0.4	0.3	0.4
1	1	45	3195	10	0.6	10	30	14	14	2	3	1	8	0	71	-14	-13	-10	-13	-11	0.2	-10	0.5	-15	0.6	0.2	0.2	0.5
1	1	49	2450	10	0.6	10	30	11	11	2	3	1	5	0	50	-15	-13	-11	-14	-11	0.3	-11	0.5	-15	0.5	0.2	0.3	0.5
1	1	102	6426	10	0.6	10	30	14	13	2	3	1	7	0	63	-15	-12	-10	-13	-10	0.2	-10	0.6	-15	0.5	0.2	0.3	0.6
2	2	4	200	10	0.6	10	25	8	11	2	4	3	4	0	50	-18	-16	-14	-18	-13	0.3	-14	0.5	-18	0.7	0.4	0.4	0.5
2	1	18	1008	10	0.6	10	35	13	12	2	3	1	5	0	56	-17	-20	-16	-20	-16	0.2	-17	0.3	-17	0.6	0.2	0.3	0.4
2	2	18	630	10	0.6	10	25	8	9	2	4	2	8	0	35	-16	-17	-12	-20	-12	0.3	-14	0.4	-16	0.7	0.4	0.4	0.5
2	1	20	880	10	0.6	10	20	9	10	1	2	1	5	0	44	-15	-14	-11	-14	-12	0.3	-11	0.6	-15	0.6	0.3	0.3	0.6
2	3	28	1568	10	0.6	10	35	12	12	2	5	1	6	0	56	-17	-17	-14	-19	-13	0.2	-14	0.3	-17	0.6	0.3	0.3	0.5
2	2	32	1792	10	0.6	10	30	12	12	2	3	2	9	0	56	-18	-17	-15	-22	-14	0.2	-16	0.3	-18	0.7	0.4	0.4	0.5
2	3	34	2142	10	0.6	10	35	14	13	2	3	4	8	0	63	-16	-13	-11	-14	-12	0.3	-12	0.4	-16	0.5	0.5	0.4	0.4
2	1	35	2205	10	0.6	10	30	14	13	2	3	1	7	0	63	-15	-13	-10	-13	-11	0.2	-10	0.5	-15	0.5	0.2	0.2	0.5
2	2	35	1225	10	0.6	10	25	8	9	2	4	3	6	0	35	-17	-17	-15	-18	-14	0.4	-14	0.5	-17	0.6	0.6	0.6	0.6
2	3	41	3485	10	0.6	10	35	12	14	2	3		5	0	85	-15	-13	-10	-13	-11	0.3	-10	0.3	-15	0.5	0.2	0.4	0.4
2	3	46	3082	10	0.6	10	40	12	12	2	4	1	5	0	67	-16	-14	-11	-15	-12	0.2	-11	0.4	-16	0.6	0.3	0.3	0.5
2	1	59	4602	10	0.6	10	40	13	15	2	2	3	5	0	78	-15	-14	-11	-14	-12	0.3	-11	0.5	-15	0.6	0.4	0.3	0.5
2	1	60	5160	10	0.6	10	30	14	16	2	2	1	7	0	86	-15	-13	-10	-13	-11	0.2	-10	0.4	-15	0.5	0.2	0.2	0.4
2	3	63	3969	10	0.6	10	30	12	13	2	3	2	5	0	63	-15	-14	-11	-14	-12	0.3	-11	0.5	-15	0.5	0.4	0.3	0.4
2	1	70	4410	10	0.6	10	25	14	13	2	3	1	7	0	63	-14	-12	-10	-13	-10	0.2	-10	0.6	-15	0.5	0.2	0.3	0.5
2	1	78	4368	10	0.6	10	25	12	12	2	3	1	7	0	56	-15	-13	-11	-13	-11	0.2	-10	0.4	-15	0.6	0.2	0.2	0.4
3	2	3	168	10	0.6	10	30	12	12	2	4	2	8	0	56	-19	-16	-15	-21	-14	0.2	-16	0.3	-19	0.7	0.2	0.3	0.4
3	3	14	1064	10	0.6	10	35	12	13	2	3		3	0	76	-15	-13	-10	-14	-10	0.3	-10	0.3	-15	0.5	0.3	0.5	0.4
3	2	14	700	10	0.6	10	40	12	11	2	4	1	7	0	50	-16	-15	-11	-16	-13	0.4	-12	0.5	-14	0.6	0.5	0.5	0.6
3	3	17	1071	10	0.6	10	40	12	13	2	3		6	0	63	-15	-14	-11	-14	-11	0.3	-10	0.3	-15	0.6	0.2	0.5	0.3
3	1	18	540	10	0.6	10	20	6	8	1	4	1	5	0	30	-17	-15	-15	-19	-11	0.2	-14	0.2	-17	0.5	0.2	0.3	0.3
3	3	19	1064	10	0.6	10	30	12	12	2	4	3	6	0	56	-15	-16	-10	-16	-13	0.2	-11	0.4	-15	0.6	0.4	0.3	0.6
3	1	29	1624	10	0.6	10	30	13	12	2	4	3	6	0	56	-13	-14	-10	-14	-11	0.5	-10	0.6	-13	0.7	0.6	0.6	0.7
3	2	37	2627	10	0.6	10	35	12	14	2	3	3	5	0	71	-19	-20	-16	-21	-17	0.2	-16	0.4	-19	0.6	0.3	0.3	0.4
3	1	42	1050	10	0.6	10	20	8	7	1	3	3	8	0	25	-16	-18	-13	-19	-14	0.3	-13	0.4	-16	0.6	0.4	0.4	0.5
3	3	50	2200	10	0.6	10	15	8	10	1	3	1	5	0	44	-15	-13	-11	-14	-12	0.4	-11	0.3	-15	0.5	0.4	0.4	0.4
3	1	53	2332	10	0.6	10	20	9	10	1	3	1	5	0	44	-15	-14	-11	-14	-12	0.4	-11	0.6	-15	0.6	0.5	0.4	0.5
3	1	68	5848	10	0.6	10	35	18	16	2	3	1	8	0	86	-15	-13	-11	-13	-11	0.3	-11	0.6	-15	0.5	0.2	0.4	0.5
3	1	97	6111	10	0.6	10	30	14	13	2	3	1	6	0	63	-15	-12	-10	-13	-10	0.2	-10	0.6	-15	0.5	0.2	0.3	0.6
4	1	6	264	10	0.6	10	15	8	10	1	5	4	5	0	44	-18	-16	-16	-18	-13	0.2	-14	0.3	-18	0.5	0.2	0.3	0.3
4	2	10	500	10	0.6	10	30	10	11	2	2	3	7	0	50	-16	-15	-12	-16	-12	0.4	-12	0.5	-15	0.6	0.5	0.4	0.6
4	1	13	572	10	0.6	10	20	10	10	1	4	1	5	0	44	-15	-13	-10	-13	-11	0.2	-11	0.5	-15	0.6	0.2	0.2	0.6
4	1	15	375	10	0.6	10	25	8	7	2	4	3	6	0	25	-19	-16	-14	-21	-13	0.3	-15	0.3	-19	0.6	0.4	0.5	0.4
4	2	22	1232	10	0.6	10	30	10	12	2	3	2	5	0	56	-15	-16	-12	-17	-13	0.4	-13	0.5	-15	0.6	0.4	0.4	0.6
4	2	28	980	10	0.6	10	25	8	9	2	4	3	7	0	35	-16	-17	-14	-19	-13	0.4	-13	0.5	-16	0.7	0.6	0.5	0.6
4	3	30	1890	10	0.6	10	35	14	13	2	2	3	6	0	63	-16	-14	-12	-15	-12	0.4	-12	0.4	-16	0.6	0.5	0.4	0.4
4	1	39	2457	10	0.6	10	30	13	13	2	3	3	6	0	63	-16	-15	-12	-16	-13	0.2	-12	0.3	-16	0.5	0.3	0.3	0.4
4	1	42	2352	10	0.6	10	25	11	12	2	3	1	5	0	56	-15	-14	-11	-14	-12	0.4	-12	0.6	-15	0.6	0.5	0.4	0.5
4	3	49	3479	10	0.6	10	35	13	14	2	2	3	5	0	71	-15	-13	-11	-14	-11	0.3	-11	0.4	-15	0.5	0.4	0.3	0.3
4	1	52	2600	10	0.6	10	30	12	11	2	2	3	5	0	50	-15	-14	-11	-14	-12	0.4	-12	0.4	-15	0.5	0.4	0.4	0.5
4	3	54	4212	10	0.6	10	35	16	15	2	3	1	9	0	78	-15	-13	-11	-14	-12	0.3	-11	0.4	-15	0.5	0.4	0.4	0.4
4	1	58	3654	10	0.6	10	30	14	13	2	3	1	7	0	63	-15	-13	-11	-13	-11	0.2	-10	0.4	-15	0.5	0.3	0.2	0.4
4	1	60	3780	10	0.6	10	30	14	13	2	3	1	8	0	63	-14	-13	-11	-13	-12	0.2	-11	0.4	-15	0.5	0.3	0.2	0.5
4	3	62	4836	10	0.6	10	40	14	15	2	2	3	5	0	78	-15	-13	-11	-14	-12	0.3	-11	0.4	-16	0.6	0.4	0.3	0.4
4	3	63	3969	10	0.6	10	30	14	13	2	3	1	6	0	63	-15	-13	-11	-14	-10	0.2	-11	0.4	-15	0.5	0.1	0.3	0.3
4	1	74	4662	10	0.6	10	30	12	13	2	4	3	5	0	63	-15	-13	-10	-13	-11	0.2	-11	0.6	-15	0.6	0.2	0.3	0.6
4	1	87	4872	10	0.6	10	30	13	12	2	3	3	6	0	56	-15	-14	-11	-15	-12	0.4	-12	0.6	-15	0.6	0.4	0.4	0.5
4	1	92	5796	10	0.6	10	30	14	13	2	3	1	7	0	63	-14	-12	-10	-13	-10	0.2	-10	0.6	-15	0.5	0.2	0.3	0.6
5	2	4	140	10	0.6	10	25	8	9	2	4	2	5	0	35	-16	-17	-10	-17	-13	0.4	-11	0.5	-16	0.7	0.5	0.5	0.6
5	2	4	100	10	0.6	10	15	6	7	1	4	3	5	0	25	-15	-16	-11	-18	-11	0.1	-11	0.5	-15	0.6	0.3	0.2	0.6
5	3	22	1386	10	0.6	10	35	14	13	2	2	3	6	0	63	-15	-13	-11	-14	-12	0.3	-11	0.4	-15	0.5	0.4	0.3	0.4
5	3	27	1917	10	0.6	10	40	13	14	2	2	3	5	0	71	-15	-13	-11	-13	-11	0.3	-11	0.4	-15	0.5	0.4	0.3	0.4
5	1	57	3192	10	0.6	10	30	10	12	2	4	3	5	0	56	-14	-13	-11	-13	-11	0.2	-11	0.5	-15	0.5	0.3	0.2	0.5
5	1	59	3717	10	0.6	10	30	14	13	2	3	1	6	0	63	-14	-13	-10	-13	-11	0.2	-10	0.4	-15	0.5	0.3	0.2	0.4
5	1	64	4992	10	0.6	10	35	16	15	2	2	1	8	0	78	-14	-13	-11	-13	-11	0.2	-11	0.4	-15	0.5	0.3	0.3	0.4
5	3	64	4544	10	0.6	10	45	14	14	3	3	3	5	0	71	-15	-14	-11	-15	-12	0.3	-12	0.5	-16	0.6	0.4	0.4	0.4
5	1	66	3696	10	0.6	10	30	12	12	2	3	4	6	0	56	-15	-13	-11	-13	-11	0.2	-10	0.4	-15	0.5	0.3	0.2	0.4
5	3	69	5382	10	0.6	10	35	16	15	2	3	1	9	0	78	-16	-13	-11	-14	-12	0.3	-12	0.4	-15	0.4	0.4	0.4	0.5
6	2	6	300	10	0.6	10	25	10	11	2	4	1	6	0	50	-17	-16	-13	-17	-13	0.4	-13	0.4	-17	0.6	0.5	0.5	0.5
6	2	7	245	10	0.6	10	25	8	9	2	4	2	5	0	35	-17	-20	-15	-21	-15	0.3	-15	0.4	-17	0.6	0.3	0.3	0.4
6	2	18	900	10	0.6	10	30	10	11	2	4	3	5	0	50	-21	-22	-17	-22	-19	0.3	-17	0.4	-21	0.7	0.4	0.4	0.5
6	1	22	660	10	0.6	10	15	7	8	1	3	1	5	0	30	-15	-14	-11	-15	-12	0.3	-12	0.5	-15	0.7	0.5	0.4	0.4
6	1	24	2040	10	0.6	10	35	12	14	2	2		5	0	85	-16	-15	-12	-15	-12	0.3	-12	0.4	-17	0.5	0.5	0.4	0.5
6	2	33	2211	10	0.6	10	30	8	12	2	3	1	8	0	67	-16	-16	-11	-17	-12	0.3	-12	0.3	-15	0.7	0.5	0.5	0.5
6	1	35	1225	10	0.6	10	20	8	9	1	3	3	8	0	35	-14	-15	-10	-15	-12	0.3	-11	0.4	-14	0.7	0.5	0.5	0.5
6	3	39	2457	10	0.6	10	30	11	13	2	2	3	5	0	63	-15	-13	-10	-14	-11	0.3	-11	0.4	-15	0.5	0.4	0.3	0.4
6	0	40	4480		0.6	10	35	16	17	2	3	1	7	0	112	-15	-12	-10	-14	-10	0.3	-11	0.5	-15	0.6	0.2	0.3	0.5
6	3	42	2814	10	0.6	10	35	10	12	2	4	3	5	0	67	-15	-15	-11	-16	-11	0.2	-12	0.4	-15	0.6	0.3	0.2	0.6
6	2	42	2814	10	0.6	10	30	10	12	2	3	1	5	0	67	-19	-17	-15	-19	-15	0.2	-16	0.4	-18	0.5	0.3	0.3	0.5
6	1	43	1505	10	0.6	10	20	8	9	1	3	1	8	0	35	-15	-15	-11	-15	-12	0.3	-11	0.3	-14	0.7	0.5	0.4	0.5
6	1	44	2464	10	0.6	10	30	13	12	2	2	3	5	0	56	-16	-14	-11	-14	-12	0.3	-11	0.4	-16	0.6	0.4	0.4	0.5
6	3	48	3408	10	0.6	10	30	12	14	2	3	1	5	0	71	-15	-14	-11	-14	-12	0.3	-11	0.4	-15	0.6	0.4	0.2	0.4
6	1	52	2600	10	0.6	10	30	12	11	2	4	3	5	0	50	-16	-16	-12	-17	-13	0.3	-12	0.4	-16	0.6	0.4	0.4	0.5
6	1	64	4032	10	0.6	10	30	14	13	2	3	1	7	0	63	-14	-12	-10	-13	-10	0.3	-10	0.6	-15	0.5	0.2	0.3	0.6
6	2	65	3250	10	0.6	10	30	10	11	2	3	3	5	0	50	-16	-15	-11	-16	-12	0.2	-12	0.5	-16	0.6	0.4	0.3	0.6
6	1	75	4200	10	0.6	10	30	12	12	2	3	4	5	0	56	-14	-13	-11	-14	-11	0.3	-11	0.5	-15	0.5	0.2	0.3	0.6
6	1	77	4312	10	0.6	10	30	14	12	2	4	3	6	0	56	-15	-13	-10	-13	-11	0.3	-11	0.4	-15	0.5	0.5	0.4	0.5
6	1	77	4312	10	0.6	10	30	14	12	2	4	3	6	0	56	-14	-13	-10	-13	-11	0.4	-10	0.5	-14	0.6	0.6	0.5	0.6
7	2	11	484	10	0.6	10	25	8	10	2	2	1	6	0	44	-16	-17	-14	-18	-13	0.2	-13	0.4	-16	0.7	0.3	0.3	0.5
7	1	11	275	10	0.6	10	30	8	7	2	3	2	7	0	25	-16	-13	-12	-15	-11	0.3	-12	0.3	-16	0.5	0.3	0.4	0.3
7	2	18	540	10	0.6	10	30	8	8	2	4	4	5	0	30	-16	-15	-11	-16	-12	0.3	-12	0.3	-16	0.4	0.3	0.3	0.4
7	1	19	1349	10	0.6	10	35	13	14	2	3	1	5	0	71	-15	-14	-11	-14	-12	0.3	-12	0.6	-15	0.6	0.3	0.3	0.6
7	1	26	936	10	0.6	10	30	8	8	2	4	3	8	0	36	-17	-15	-13	-18	-11	0.3	-14	0.2	-17	0.6	0.2	0.3	0.3
7	3	27	1350	10	0.6	10	30	10	11	2	2	3	5	0	50	-15	-13	-10	-13	-11	0.2	-11	0.4	-15	0.5	0.4	0.3	0.4
7	1	30	1680	10	0.6	10	30	12	12	2	4	3	6	0	56	-14	-13	-10	-13	-11	0.4	-10	0.5	-15	0.6	0.5	0.4	0.5
7	1	30	1320	10	0.6	10	30	12	10	2	3	3	8	0	44	-14	-14	-11	-14	-11	0.3	-11	0.4	-14	0.6	0.4	0.4	0.4
7	1	32	1408	10	0.6	10	20	9	10	1	3	3	7	0	44	-15	-13	-10	-14	-11	0.2	-11	0.6	-15	0.6	0.2	0.3	0.6
7	0	36	2268		0.6	10	30	14	13	2	2	3	5	0	63	-15	-12	-10	-13	-9	0.2	-10	0.4	-15	0.5	0.1	0.3	0.4
7	3	40	2240	10	0.6	10	30	12	12	2	4	1	6	0	56	-17	-15	-12	-15	-13	0.3	-12	0.4	-16	0.6	0.5	0.4	0.4
8	2	3	24	10	0.6	10	10	2	3	1	3	3	6	0	8	-22	-23	-20	-26	-18	0.2	-21	0.3	-22	0.5	0.2	0.2	0.3
8	2	4	140	10	0.6	10	25	8	9	2	4	1	3	0	35	-16	-18	-13	-18	-15	0.3	-14	0.4	-16	0.6	0.4	0.4	0.5
8	1	7	658	10	0.6	10	35	16	17	2	3	1	6	0	94	-15	-13	-10	-14	-11	0.3	-10	0.5	-14	0.6	0.4	0.4	0.6
8	2	7	350	10	0.6	10	30	12	11	2	3	1	7	0	50	-20	-21	-19	-24	-17	0.2	-19	0.3	-20	0.7	0.2	0.2	0.4
8	1	8	64	10	0.6	10	10	2	3	1	4		5	0	8	-20	-21	-17	-25	-13	0.1	-19	0.1	-20	0.6	0.2	0.2	0.3
8	3	9	450	10	0.6	10	25	12	11	2	3	1	8	0	50	-15	-13	-11	-14	-12	0.4	-11	0.4	-15	0.5	0.4	0.4	0.4
8	3	11	737	10	0.6	10	40	14	12	2	4	4	5	0	67	-15	-16	-11	-17	-11	0.2	-11	0.4	-15	0.5	0.3	0.3	0.5
8	3	24	1512	10	0.6	10	35	12	13	2	4	1	6	0	63	-15	-15	-11	-16	-11	0.2	-11	0.4	-15	0.6	0.4	0.3	0.5
8	1	57	3591	10	0.6	10	30	11	13	2	3	3	5	0	63	-15	-13	-11	-14	-11	0.3	-11	0.5	-15	0.5	0.3	0.3	0.5
8	1	71	3976	10	0.6	10	30	12	12	2	3	4	5	0	56	-15	-13	-10	-14	-11	0.4	-11	0.4	-15	0.6	0.5	0.4	0.5
8	3	76	5396	10	0.6	10	40	12	14	2	2	4	5	0	71	-15	-13	-11	-14	-12	0.3	-11	0.4	-16	0.5	0.4	0.3	0.4
8	3	82	3608	10	0.6	10	15	8	10	1	3	1	5	0	44	-15	-13	-11	-13	-11	0.3	-11	0.4	-15	0.4	0.4	0.4	0.3
8	3	82	3608	10	0.6	10	15	8	10	1	3	1	5	0	44	-15	-13	-11	-13	-11	0.3	-11	0.4	-15	0.4	0.4	0.4	0.4
9	3	5	260	10	0.6	10	20	8	10	1	4	1	5	0	52	-17	-16	-13	-17	-14	0.3	-13	0.5	-18	0.6	0.4	0.3	0.6
9	2	5	40	10	0.6	10	5	3	3	1	3	3	1	0	8	-19	-20	-15	-23	-14	0.3	-17	0.3	-19	0.7	0.4	0.4	0.5
9	3	30	1890	10	0.6	10	40	12	13	2	2		7	0	63	-16	-14	-11	-14	-11	0.4	-11	0.4	-15	0.6	0.3	0.5	0.4
9	1	30	1680	10	0.6	10	25	10	12	2	4	2	6	0	56	-15	-19	-12	-20	-13	0.3	-13	0.4	-15	0.7	0.4	0.4	0.6
9	1	80	4480	10	0.6	10	30	12	12	2	3	3	5	0	56	-15	-14	-11	-14	-12	0.4	-11	0.5	-15	0.6	0.4	0.4	0.5
10	1	6	210	10	0.6	10	30	10	9	2	4	4	7	0	35	-15	-13	-12	-15	-11	0.2	-11	0.2	-15	0.5	0.2	0.3	0.3
10	3	6	180	4	0.6	10	30	8	7	2	4	1	5	0	30	-15	-15	-10	-15	-11	0.2	-10	0.4	-15	0.6	0.3	0.3	0.5
10	1	9	504	10	0.6	10	35	12	12	2	4	2	9	0	56	-18	-19	-15	-21	-13	0.3	-16	0.4	-18	0.7	0.4	0.4	0.6
10	3	22	924	10	0.6	10	35	10	9	2	4	1	5	0	42	-15	-16	-11	-15	-13	0.3	-11	0.5	-15	0.6	0.4	0.5	0.6
10	1	23	1288	10	0.6	10	30	12	12	2	4	3	8	0	56	-18	-18	-14	-18	-15	0.3	-14	0.3	-18	0.6	0.5	0.4	0.5
10	2	27	1350	10	0.6	10	30	10	11	2	4	3	9	0	50	-16	-17	-12	-18	-12	0.2	-12	0.3	-16	0.7	0.4	0.3	0.5
11	2	17	595	10	0.6	10	25	8	9	2	4	1	6	0	35	-17	-17	-14	-18	-14	0.3	-14	0.3	-17	0.6	0.4	0.4	0.4
11	1	21	924	10	0.6	10	30	10	10	2	3	3	6	0	44	-16	-13	-13	-16	-12	0.3	-13	0.2	-17	0.6	0.3	0.3	0.2
11	1	30	900	10	0.6	10	20	9	8	1	3	3	8	0	30	-16	-15	-11	-16	-13	0.3	-12	0.4	-15	0.7	0.5	0.4	0.4
11	2	45	1575	10	0.6	10	25	8	9	2	4	3	6	0	35	-15	-14	-12	-15	-12	0.4	-12	0.5	-15	0.7	0.5	0.5	0.5
12	2	3	228	10	0.6	10	35	10	13	2	5	2	2	0	76	-19	-20	-17	-24	-16	0.3	-18	0.4	-19	0.7	0.3	0.3	0.5
12	1	3	150	10	0.6	10	25	10	11	2	4	1	6	0	50	-16	-16	-11	-17	-13	0.3	-13	0.6	-16	0.7	0.4	0.4	0.6
12	3	4	140	10	0.6	10	25	8	9	2	4		5	0	35	-22	-22	-19	-25	-17	0.2	-20	0.2	-23	0.5	0.2	0.2	0.4
12	1	17	884	10	0.6	10	40	10	10	2	4	3	8	0	52	-16	-13	-12	-15	-11	0.3	-12	0.2	-16	0.5	0.2	0.3	0.3
12	3	23	1012	10	0.6	10	25	10	10	2	3	4	6	0	44	-15	-14	-11	-14	-12	0.3	-11	0.3	-15	0.5	0.3	0.4	0.4
13	3	14	882	10	0.6	10	35	10	13	2	4		5	0	63	-15	-13	-11	-15	-11	0.3	-11	0.3	-15	0.5	0.3	0.4	0.4
13	1	15	450	10	0.6	10	30	8	8	2	2	3	5	0	30	-16	-15	-11	-16	-11	0.4	-12	0.4	-16	0.7	0.5	0.6	0.5
13	2	39	2613	10	0.6	10	30	10	12	2	4	2	5	0	67	-15	-17	-11	-18	-12	0.2	-12	0.4	-15	0.7	0.4	0.4	0.6
14	3	3	189	10	0.6	10	35	12	13	2	3		5	0	63	-22	-19	-19	-24	-15	0.2	-19	0.3	-22	0.6	0.2	0.3	0.2
14	2	20	720	10	0.6	10	30	8	8	2	4	3	5	0	36	-16	-15	-12	-18	-11	0.2	-13	0.3	-16	0.6	0.2	0.3	0.4
14	1	45	2250	10	0.6	10	25	10	11	2	4	2	5	0	50	-17	-18	-14	-19	-14	0.3	-15	0.4	-17	0.6	0.4	0.4	0.5
15	1	7	210	10	0.6	10	15	6	8	1	4	1	5	0	30	-16	-13	-11	-15	-11	0.2	-12	0.2	-15	0.6	0.2	0.2	0.2
16	1	8	160	10	0.6	10	25	6	6	2	3	4	4	0	20	-16	-20	-14	-21	-10	0.3	-13	0.3	-17	0.6	0.3	0.3	0.6
16	2	17	748	10	0.6	10	25	8	10	2	3	3	5	0	44	-15	-17	-11	-16	-14	0.4	-11	0.3	-15	0.7	0.4	0.6	0.4
17	2	7	308	10	0.6	10	25	10	10	2	5	2	6	0	44	-15	-15	-11	-16	-11	0.2	-11	0.3	-15	0.6	0.3	0.2	0.5
17	3	32	2272	10	0.6	10	40	14	14	2	2		5	0	71	-16	-13	-11	-14	-10	0.3	-11	0.3	-16	0.4	0.1	0.3	0.4
18	1	18	900	10	0.6	10	25	10	11	2	2	6	8	0	50	-17	-17	-14	-20	-14	0.2	-14	0.4	-18	0.6	0.3	0.3	0.6
19	3	3	189	10	0.6	10	40	12	13	2	4		4	0	63	-16	-15	-15	-19	-13	0.2	-15	0.3	-17	0.6	0.2	0.3	0.4
19	2	7	441	10	0.6	10	35	12	13	2	4	3	5	0	63	-22	-22	-18	-24	-18	0.2	-18	0.4	-22	0.5	0.4	0.3	0.6
19	3	9	378	10	0.6	10	30	10	9	2	4	1	5	0	42	-17	-17	-12	-17	-13	0.3	-12	0.4	-17	0.6	0.4	0.4	0.6
20	1	19	1064	10	0.6	10	30	12	12	2	4	4	3	0	56	-17	-15	-12	-18	-12	0.3	-14	0.3	-17	0.6	0.3	0.4	0.4
22	1	27	810	10	0.6	10	15	6	8	1	5	1	5	0	30	-17	-13	-13	-17	-11	0.2	-13	0.2	-17	0.5	0.2	0.3	0.3
22	1	27	810	10	0.6	10	15	6	8	1	5	1	5	0	30	-17	-13	-13	-17	-11	0.2	-13	0.2	-17	0.5	0.2	0.3	0.3
1	3	26	1274	5	0.7	10	35	12	9	2	4	4	6	0	49	-14	-15	-10	-15	-12	0.2	-10	0.4	-14	0.5	0.3	0.4	0.6
1	2	28	2184	10	0.7	10	35	10	12	2	2	1	8	0	78	-15	-15	-12	-16	-13	0.2	-12	0.4	-16	0.6	0.3	0.3	0.5
1	3	52	4836	5	0.7	10	35	16	15	2	3	1	9	0	93	-16	-13	-11	-14	-11	0.3	-11	0.4	-15	0.5	0.4	0.4	0.4
1	3	64	6592	5	0.7	10	35	16	16	2	2	1	6	0	103	-15	-12	-11	-13	-10	0.2	-11	0.4	-15	0.4	0.1	0.2	0.4
1	1	75	7725	10	0.7	10	35	16	16	2	3	1	7	0	103	-15	-13	-11	-14	-11	0.3	-11	0.5	-16	0.5	0.2	0.3	0.5
1	1	91	10192	10	0.7	10	35	16	17	2	3	1	7	0	112	-15	-13	-11	-14	-11	0.3	-11	0.5	-15	0.5	0.2	0.3	0.5
2	2	3	90	10	0.7	10	15	6	7	1	4	3	5	0	30	-18	-18	-17	-21	-12	0.3	-15	0.4	-19	0.7	0.3	0.3	0.4
2	3	8	680	5	0.7	10	35	12	14	2	2		5	0	85	-16	-16	-13	-16	-13	0.2	-13	0.4	-18	0.5	0.3	0.3	0.6
2	1	8	608	10	0.7	10	35	14	13	2	2	3	5	0	76	-15	-12	-10	-13	-11	0.3	-11	0.4	-15	0.5	0.4	0.3	0.4
2	2	8	240	10	0.7	10	15	6	7	1	4	1	5	0	30	-15	-14	-10	-15	-13	0.2	-11	0.4	-15	0.5	0.4	0.4	0.5
2	2	13	871	10	0.7	10	30	10	12	2	4	3	5	0	67	-16	-15	-12	-16	-12	0.3	-12	0.5	-15	0.4	0.5	0.4	0.6
2	1	36	2736	10	0.7	10	35	14	13	2	4	3	5	0	76	-15	-13	-10	-14	-11	0.4	-11	0.6	-15	0.6	0.4	0.4	0.6
2	2	52	2184	10	0.7	10	25	8	9	2	3	3	6	0	42	-15	-14	-12	-15	-12	0.3	-12	0.4	-15	0.6	0.5	0.4	0.5
2	0	54	3618		0.7	10	25	12	12	2	3	1	6	0	67	-15	-12	-11	-14	-10	0.3	-11	0.4	-15	0.6	0.2	0.3	0.4
2	1	55	6160	10	0.7	10	35	16	17	2	3	1	6	0	112	-15	-13	-11	-13	-11	0.3	-11	0.5	-15	0.6	0.2	0.3	0.5
2	1	72	5472	10	0.7	10	30	14	13	2	3	1	6	0	76	-15	-13	-10	-13	-11	0.2	-10	0.4	-15	0.5	0.2	0.2	0.4
3	2	7	294	10	0.7	10	25	8	9	2	4	4	6	0	42	-19	-19	-18	-20	-15	0.2	-16	0.4	-19	0.6	0.3	0.2	0.3
3	2	7	294	10	0.7	10	25	8	9	2	4	4	6	0	42	-19	-19	-18	-20	-15	0.2	-16	0.4	-19	0.6	0.3	0.2	0.3
3	1	8	680	10	0.7	10	30	14	14	2	2	1	6	0	85	-14	-12	-10	-13	-11	0.3	-11	0.6	-15	0.5	0.2	0.3	0.6
3	2	9	324	10	0.7	10	15	6	8	1	3	1	6	0	36	-18	-17	-13	-17	-14	0.4	-14	0.5	-18	0.6	0.6	0.6	0.6
3	3	14	1064	5	0.7	10	35	14	13	2	3	1	8	0	76	-15	-13	-11	-14	-11	0.3	-12	0.4	-15	0.5	0.5	0.4	0.4
3	3	30	2790	5	0.7	10	40	14	15	2	2	3	5	0	93	-16	-13	-11	-14	-11	0.3	-11	0.4	-16	0.6	0.5	0.3	0.3
3	2	31	1829	10	0.7	10	25	8	11	2	4	1	5	0	59	-19	-19	-17	-21	-15	0.2	-16	0.4	-19	0.7	0.3	0.3	0.4
3	0	52	3484		0.7	10	25	12	12	2	3	1	6	0	67	-15	-13	-11	-14	-10	0.3	-11	0.4	-16	0.6	0.2	0.3	0.4
3	1	83	6308	10	0.7	10	30	14	13	2	3	1	7	0	76	-14	-13	-11	-13	-11	0.2	-10	0.4	-15	0.5	0.3	0.2	0.5
4	3	23	1955	5	0.7	10	40	12	14	2	3		6	0	85	-14	-13	-11	-14	-11	0.3	-10	0.3	-15	0.6	0.2	0.4	0.3
4	1	44	3344	10	0.7	10	30	14	13	2	3	4	7	0	76	-15	-13	-10	-13	-11	0.2	-10	0.4	-15	0.6	0.3	0.3	0.5
4	0	62	4712		0.7	10	35	14	13	2	3	1	5	0	76	-15	-12	-11	-13	-10	0.2	-11	0.3	-15	0.5	0.2	0.3	0.3
4	1	70	5320	10	0.7	10	35	14	13	2	3	3	5	0	76	-16	-13	-11	-14	-12	0.3	-12	0.4	-16	0.5	0.4	0.4	0.4
5	2	6	252	10	0.7	10	25	8	9	2	4	1	5	0	42	-15	-15	-10	-14	-12	0.4	-10	0.5	-13	0.5	0.5	0.5	0.6
5	2	7	294	10	0.7	10	25	8	9	2	4	3	5	0	42	-19	-18	-16	-20	-13	0.3	-16	0.3	-18	0.7	0.3	0.3	0.4
5	3	35	2975	5	0.7	10	35	12	14	2	4		7	0	85	-15	-13	-11	-14	-11	0.2	-11	0.4	-15	0.5	0.2	0.3	0.4
5	3	36	3060	5	0.7	10	40	14	14	2	2		6	0	85	-16	-14	-12	-15	-13	0.2	-12	0.5	-17	0.5	0.3	0.3	0.4
5	3	49	4557	5	0.7	10	35	16	15	2	4	1	9	0	93	-16	-13	-11	-14	-11	0.3	-11	0.4	-15	0.5	0.4	0.4	0.4
5	1	55	5665	10	0.7	10	35	16	16	2	3	1	8	0	103	-15	-13	-11	-13	-11	0.3	-11	0.6	-15	0.6	0.3	0.3	0.6
5	0	85	7225		0.7	10	35	15	14	2	3	3	5	0	85	-15	-12	-11	-13	-9	0.3	-11	0.4	-15	0.5	0.1	0.3	0.4
5	1	89	9968	10	0.7	10	35	16	17	2	3	1	8	0	112	-15	-13	-11	-14	-11	0.3	-11	0.6	-15	0.5	0.3	0.3	0.6
6	2	6	354	10	0.7	10	30	12	11	2	2	1	9	0	59	-18	-17	-14	-19	-15	0.3	-15	0.4	-18	0.6	0.3	0.4	0.5
6	2	13	546	10	0.7	10	25	8	9	2	4	3	5	0	42	-19	-17	-16	-20	-14	0.3	-16	0.3	-19	0.7	0.4	0.3	0.4
6	2	18	504	10	0.7	10	20	6	6	1	4	1	5	0	28	-15	-14	-11	-16	-10	0.3	-11	0.3	-16	0.6	0.3	0.4	0.3
6	3	22	1672	5	0.7	10	25	12	13	2	2	4	6	0	76	-15	-12	-11	-13	-10	0.2	-11	0.4	-15	0.6	0.2	0.2	0.4
6	3	23	966	5	0.7	10	30	8	8	2	4	1	5	0	42	-14	-16	-10	-15	-12	0.3	-11	0.4	-14	0.6	0.4	0.4	0.5
6	3	34	2584	5	0.7	10	35	14	13	2	2	1	5	0	76	-15	-13	-11	-13	-11	0.3	-12	0.3	-16	0.5	0.4	0.4	0.4
6	3	41	2501	5	0.7	10	35	10	10	2	4	1	5	0	61	-15	-15	-11	-15	-12	0.3	-12	0.4	-13	0.6	0.3	0.4	0.5
6	1	44	3344	10	0.7	10	35	14	13	2	2	3	9	0	76	-15	-14	-11	-14	-11	0.3	-11	0.4	-15	0.6	0.4	0.4	0.4
6	3	47	4841	5	0.7	10	35	16	16	2	3	1	7	0	103	-15	-13	-11	-14	-10	0.3	-11	0.5	-15	0.6	0.2	0.4	0.5
6	2	52	2184	10	0.7	10	25	8	9	2	4	3	6	0	42	-14	-15	-11	-16	-12	0.3	-11	0.5	-14	0.6	0.4	0.4	0.6
6	1	60	6180	10	0.7	10	35	16	16	2	2	1	7	0	103	-14	-13	-11	-13	-11	0.2	-11	0.4	-15	0.5	0.3	0.2	0.4
7	1	10	1120	10	0.7	10	35	16	17	2	3	1	8	0	112	-14	-13	-11	-13	-11	0.3	-11	0.5	-15	0.5	0.3	0.3	0.5
7	2	12	804	10	0.7	10	30	10	12	2	3	4	5	0	67	-16	-17	-14	-17	-14	0.3	-12	0.5	-16	0.6	0.4	0.4	0.5
7	2	12	504	10	0.7	10	25	8	9	2	2	3	6	0	42	-18	-18	-14	-20	-14	0.2	-15	0.5	-18	0.6	0.3	0.3	0.6
7	3	31	2635	5	0.7	10	35	15	14	2	3	1	6	0	85	-15	-13	-11	-14	-12	0.3	-11	0.4	-16	0.6	0.4	0.4	0.4
7	3	51	3417	5	0.7	10	30	13	12	2	3	1	6	0	67	-15	-13	-11	-13	-11	0.4	-11	0.4	-15	0.5	0.5	0.4	0.4
8	3	14	938	5	0.7	10	35	10	12	2	2		6	0	67	-16	-14	-12	-14	-11	0.3	-12	0.4	-16	0.5	0.2	0.3	0.3
8	3	14	938	5	0.7	10	30	10	12	2	2		5	0	67	-15	-13	-11	-14	-10	0.3	-10	0.3	-15	0.4	0.2	0.3	0.4
8	1	19	1444	10	0.7	10	30	12	13	2	4	4	8	0	76	-16	-13	-12	-15	-11	0.3	-12	0.2	-16	0.4	0.2	0.3	0.2
8	3	23	2139	5	0.7	10	40	14	15	2	3		5	0	93	-16	-15	-11	-16	-12	0.2	-11	0.4	-17	0.6	0.3	0.3	0.6
8	3	26	2288	10	0.7	10	45	12	13	3	2		6	0	88	-16	-13	-11	-14	-11	0.3	-11	0.3	-16	0.5	0.2	0.4	0.4
8	3	32	2976	5	0.7	10	40	14	15	2	2		5	0	93	-15	-13	-11	-14	-11	0.3	-11	0.3	-15	0.5	0.2	0.4	0.3
8	3	45	4905	5	0.7	10	40	14	15	2	3		5	0	109	-16	-14	-11	-14	-12	0.3	-11	0.5	-16	0.5	0.4	0.3	0.4
8	2	50	3350	10	0.7	10	30	12	12	2	2	1	9	0	67	-17	-17	-14	-18	-14	0.2	-14	0.3	-17	0.6	0.3	0.3	0.4
8	0	72	5472		0.7	10	35	13	13	2	4	4	5	0	76	-15	-12	-11	-14	-10	0.3	-11	0.4	-15	0.6	0.2	0.3	0.4
9	2	9	378	10	0.7	10	25	8	9	2	4	3	5	0	42	-13	-14	-11	-15	-11	0.3	-11	0.6	-13	0.7	0.5	0.5	0.7
9	3	23	1357	5	0.7	10	30	10	11	2	4		5	0	59	-14	-13	-11	-14	-10	0.3	-10	0.3	-15	0.5	0.2	0.3	0.4
9	2	32	1152	10	0.7	10	20	8	8	1	3	3	6	0	36	-15	-16	-12	-16	-13	0.3	-12	0.5	-15	0.7	0.4	0.4	0.6
9	3	47	4653	5	0.7	10	40	14	14	2	4		5	0	99	-15	-12	-11	-13	-10	0.3	-10	0.3	-15	0.4	0.2	0.4	0.3
10	1	5	380	10	0.7	10	35	14	13	2	2	3	5	0	76	-15	-14	-10	-15	-12	0.3	-12	0.4	-15	0.6	0.4	0.4	0.5
10	2	12	504	10	0.7	10	25	8	9	2	3	3	6	0	42	-14	-15	-11	-16	-11	0.3	-11	0.5	-14	0.7	0.5	0.5	0.6
10	2	17	714	10	0.7	10	25	8	9	2	2	3	6	0	42	-14	-16	-11	-15	-13	0.4	-11	0.3	-14	0.7	0.4	0.5	0.4
10	1	18	1674	10	0.7	10	30	14	15	2	4	1	6	0	93	-15	-12	-10	-13	-10	0.3	-10	0.7	-15	0.5	0.3	0.3	0.7
10	3	21	1953	5	0.7	10	40	14	15	2	2		5	0	93	-14	-14	-11	-14	-11	0.3	-10	0.3	-14	0.6	0.2	0.4	0.4
10	1	30	2790	10	0.7	10	40	14	15	2	2		5	0	93	-17	-14	-12	-15	-11	0.3	-11	0.5	-17	0.5	0.3	0.3	0.6
10	3	35	2975	5	0.7	10	40	14	14	2	3		5	0	85	-16	-14	-12	-15	-12	0.3	-12	0.5	-16	0.5	0.3	0.3	0.5
10	1	36	2736	10	0.7	10	35	14	13	2	2	3	8	0	76	-15	-13	-10	-13	-11	0.3	-10	0.4	-15	0.5	0.4	0.4	0.4
10	1	57	5301	10	0.7	10	30	16	15	2	3	3	7	0	93	-15	-13	-10	-13	-11	0.3	-10	0.6	-15	0.6	0.4	0.3	0.6
10	0	67	5092		0.7	10	30	14	13	2	2	1	5	0	76	-15	-12	-11	-13	-10	0.3	-11	0.4	-15	0.5	0.1	0.3	0.4
10	0	67	5092		0.7	10	30	14	13	2	2	1	5	0	76	-15	-12	-11	-13	-10	0.3	-11	0.3	-15	0.5	0.1	0.3	0.3
11	2	8	240	10	0.7	10	15	6	7	1	4	1	5	0	30	-16	-17	-11	-18	-13	0.3	-12	0.4	-16	0.7	0.5	0.5	0.6
11	2	13	988	10	0.7	10	35	12	13	2	4	1	6	0	76	-15	-14	-11	-15	-12	0.3	-11	0.4	-15	0.5	0.4	0.4	0.5
11	2	13	468	10	0.7	10	25	8	8	2	4	1	5	0	36	-16	-18	-12	-18	-14	0.2	-13	0.4	-15	0.6	0.4	0.4	0.5
11	1	33	2805	10	0.7	10	35	12	14	2	2		5	0	85	-16	-13	-12	-15	-10	0.3	-11	0.4	-17	0.5	0.3	0.4	0.4
11	3	43	3999	5	0.7	10	40	14	15	2	2		6	0	93	-15	-13	-11	-13	-10	0.2	-10	0.3	-15	0.5	0.2	0.3	0.4
12	2	6	312	10	0.7	10	25	8	10	2	2	1	6	0	52	-14	-15	-10	-15	-10	0.3	-11	0.5	-14	0.6	0.4	0.4	0.6
12	3	19	1273	5	0.7	10	35	12	12	2	3		5	0	67	-15	-13	-11	-13	-10	0.3	-10	0.3	-14	0.6	0.2	0.3	0.4
12	1	27	2295	10	0.7	10	35	12	14	2	2		5	0	85	-16	-14	-12	-15	-11	0.3	-12	0.4	-17	0.5	0.3	0.4	0.4
13	2	7	413	10	0.7	10	30	10	11	2	2	3	6	0	59	-19	-21	-16	-21	-18	0.2	-16	0.3	-19	0.7	0.3	0.4	0.4
13	1	14	1190	10	0.7	10	35	12	14	2	2		5	0	85	-16	-15	-12	-16	-13	0.3	-12	0.5	-17	0.6	0.4	0.4	0.5
13	1	27	1404	10	0.7	10	20	10	10	1	4	2	6	0	52	-18	-18	-15	-20	-15	0.3	-15	0.4	-18	0.7	0.3	0.4	0.5
13	1	27	1404	10	0.7	10	20	10	10	1	4	2	6	0	52	-18	-18	-15	-20	-15	0.3	-15	0.4	-18	0.7	0.3	0.4	0.5
13	2	55	3685	10	0.7	10	30	8	12	2	4	4	5	0	67	-15	-15	-11	-16	-12	0.2	-11	0.3	-15	0.6	0.4	0.4	0.5
13	2	55	3685	10	0.7	10	30	8	12	2	4	4	5	0	67	-15	-15	-11	-16	-12	0.2	-11	0.3	-15	0.6	0.4	0.4	0.5
14	2	8	536	10	0.7	10	35	12	12	2	3	3	8	0	67	-15	-14	-11	-15	-11	0.3	-11	0.3	-15	0.5	0.4	0.4	0.5
14	1	8	416	10	0.7	10	25	8	10	2	4	1	5	0	52	-20	-14	-16	-18	-12	0.2	-13	0.3	-20	0.4	0.2	0.3	0.3
14	1	8	416	10	0.7	10	25	8	10	2	4	1	5	0	52	-20	-14	-16	-18	-12	0.2	-13	0.3	-20	0.4	0.2	0.3	0.3
14	3	21	1092	5	0.7	10	30	10	10	2	3		5	0	52	-15	-13	-11	-14	-10	0.2	-10	0.3	-15	0.5	0.2	0.3	0.4
14	1	50	3800	10	0.7	10	30	12	13	2	5	3	7	0	76	-16	-13	-11	-16	-11	0.3	-12	0.2	-16	0.5	0.2	0.3	0.3
17	1	5	260	10	0.7	10	30	10	10	2	3	3	5	0	52	-16	-15	-11	-16	-11	0.3	-12	0.2	-16	0.6	0.3	0.3	0.2
17	2	6	312	10	0.7	10	25	8	10	2	2	3	6	0	52	-14	-16	-13	-17	-10	0.3	-11	0.5	-14	0.7	0.4	0.3	0.7
17	1	30	2550	10	0.7	10	35	12	14	2	2		5	0	85	-17	-17	-14	-20	-12	0.2	-14	0.4	-18	0.6	0.3	0.4	0.5
18	1	11	330	10	0.7	10	15	6	7	1	2		5	0	30	-16	-14	-12	-16	-10	0.3	-11	0.4	-17	0.6	0.4	0.5	0.4
18	2	19	1273	10	0.7	10	30	10	12	2	2	1	6	0	67	-15	-18	-12	-17	-14	0.3	-12	0.3	-15	0.7	0.4	0.5	0.4
1	1	8	1048	10	0.8	10	35	16	17	2	2	1	6	0	131	-14	-13	-11	-13	-12	0.3	-11	0.5	-15	0.5	0.3	0.3	0.6
1	3	8	704	5	0.8	10	40	14	13	2	3		3	0	88	-16	-14	-11	-14	-11	0.3	-11	0.4	-16	0.5	0.5	0.3	0.4
1	3	15	1320	5	0.8	10	35	12	13	2	4		5	0	88	-15	-13	-10	-13	-11	0.2	-10	0.3	-15	0.4	0.2	0.3	0.3
1	3	18	1404	5	0.8	10	30	10	12	2	2		5	0	78	-16	-13	-11	-14	-10	0.2	-10	0.2	-16	0.5	0.2	0.3	0.3
1	3	27	1863	5	0.8	10	30	10	11	2	3		6	0	69	-15	-13	-11	-13	-10	0.2	-10	0.3	-15	0.5	0.2	0.3	0.3
1	3	38	3344	5	0.8	10	35	12	13	2	2		6	0	88	-15	-13	-11	-14	-10	0.3	-11	0.4	-16	0.4	0.2	0.3	0.4
1	3	62	7440	5	0.8	10	35	16	16	2	4	1	8	0	120	-15	-13	-10	-13	-11	0.2	-10	0.4	-15	0.4	0.3	0.3	0.4
2	3	28	1932	5	0.8	10	30	10	11	2	3		6	0	69	-16	-13	-11	-14	-11	0.2	-11	0.2	-16	0.5	0.2	0.3	0.3
2	3	31	3069	5	0.8	10	40	12	14	2	3		4	0	99	-15	-14	-11	-14	-12	0.3	-11	0.4	-16	0.5	0.4	0.3	0.4
2	3	39	3861	5	0.8	10	40	14	14	2	3		5	0	99	-16	-14	-12	-14	-11	0.3	-11	0.4	-16	0.5	0.2	0.4	0.4
2	1	43	4687	10	0.8	10	40	14	15	2	2		5	0	109	-16	-14	-12	-15	-12	0.3	-12	0.5	-17	0.5	0.4	0.5	0.6
2	1	45	5895	10	0.8	10	35	16	17	2	3	1	6	0	131	-15	-13	-11	-14	-11	0.3	-11	0.5	-15	0.5	0.2	0.3	0.4
2	3	120	13080	5	0.8	10	25	14	15	2	4	4	6	0	109	-15	-12	-11	-13	-10	0.3	-10	0.4	-15	0.5	0.2	0.3	0.4
3	2	18	882	10	0.8	10	25	8	9	2	3	3	6	0	49	-17	-16	-13	-18	-13	0.4	-14	0.4	-17	0.7	0.4	0.4	0.5
3	3	23	2047	5	0.8	10	40	12	12	2	3		6	0	89	-16	-14	-11	-15	-11	0.2	-11	0.3	-16	0.5	0.2	0.3	0.3
3	3	24	2376	5	0.8	10	40	14	14	2	2		5	0	99	-16	-13	-11	-14	-11	0.3	-11	0.3	-16	0.5	0.2	0.3	0.4
3	3	67	8040	5	0.8	10	35	16	16	2	3	3	8	0	120	-15	-13	-11	-14	-10	0.3	-11	0.4	-15	0.5	0.2	0.3	0.4
3	3	68	6732	5	0.8	10	30	14	14	2	3	4	7	0	99	-15	-13	-11	-14	-10	0.3	-11	0.3	-15	0.6	0.2	0.3	0.4
4	1	4	396	10	0.8	10	30	14	14	2	2	1	6	0	99	-14	-12	-11	-13	-10	0.2	-10	0.6	-15	0.5	0.2	0.3	0.6
4	3	19	1881	5	0.8	10	40	14	14	2	2		5	0	99	-15	-13	-11	-13	-10	0.3	-11	0.3	-15	0.5	0.2	0.4	0.3
4	3	24	1872	5	0.8	10	30	10	12	2	4		5	0	78	-15	-12	-10	-14	-10	0.3	-11	0.3	-15	0.5	0.2	0.4	0.2
4	2	29	1421	10	0.8	10	25	8	9	2	2	3	7	0	49	-14	-15	-12	-16	-12	0.3	-12	0.5	-14	0.7	0.5	0.5	0.6
4	3	30	3270	5	0.8	10	40	14	15	2	2		5	0	109	-15	-13	-11	-13	-10	0.3	-10	0.3	-15	0.5	0.2	0.3	0.4
4	1	37	4033	10	0.8	10	40	14	15	2	3		5	0	109	-22	-14	-12	-15	-12	0.3	-11	0.5	-17	0.5	0.4	0.5	0.6
4	3	74	9694	5	0.8	10	35	16	17	2	2	1	6	0	131	-15	-13	-11	-14	-11	0.3	-11	0.4	-15	0.6	0.2	0.4	0.4
5	3	12	1068	5	0.8	10	40	12	12	2	3		5	0	89	-16	-14	-11	-14	-11	0.3	-11	0.3	-15	0.5	0.2	0.3	0.3
5	3	22	2882	5	0.8	10	35	16	17	2	3	1	6	0	131	-15	-12	-11	-14	-10	0.3	-11	0.5	-16	0.5	0.2	0.4	0.5
5	3	33	2904	5	0.8	10	30	12	13	2	4		5	0	88	-15	-12	-11	-13	-10	0.3	-10	0.3	-15	0.4	0.2	0.3	0.3
5	3	66	8646	5	0.8	10	35	16	17	2	2	3	7	0	131	-15	-12	-11	-13	-10	0.3	-11	0.4	-15	0.5	0.2	0.3	0.4
5	1	90	11790	10	0.8	10	35	16	17	2	3	1	8	0	131	-15	-13	-11	-14	-11	0.3	-11	0.5	-15	0.5	0.2	0.4	0.5
6	3	30	2970	5	0.8	10	35	12	14	2	2		5	0	99	-16	-15	-12	-15	-12	0.3	-12	0.5	-17	0.5	0.3	0.3	0.6
6	3	34	2652	5	0.8	10	35	12	12	2	4		5	0	78	-14	-12	-11	-13	-10	0.2	-10	0.3	-15	0.5	0.2	0.3	0.3
6	3	38	3762	5	0.8	10	40	14	14	2	3		6	0	99	-16	-13	-11	-14	-11	0.3	-12	0.4	-16	0.5	0.2	0.3	0.3
6	3	45	4455	5	0.8	10	40	14	14	2	2		6	0	99	-15	-12	-10	-13	-10	0.3	-11	0.4	-15	0.4	0.1	0.3	0.4
6	3	45	4455	5	0.8	10	40	14	14	2	2		6	0	99	-15	-12	-10	-13	-10	0.3	-11	0.4	-15	0.4	0.1	0.3	0.4
6	3	49	5880	5	0.8	10	35	16	16	2	4	1	6	0	120	-16	-12	-11	-14	-10	0.3	-11	0.4	-16	0.5	0.2	0.3	0.4
6	1	54	7074	10	0.8	10	35	16	17	2	3	1	8	0	131	-15	-13	-11	-14	-11	0.3	-11	0.6	-15	0.6	0.2	0.3	0.6
7	2	8	552	10	0.8	10	30	8	11	2	4	1	5	0	69	-14	-16	-11	-16	-12	0.3	-11	0.4	-14	0.7	0.5	0.5	0.5
7	3	10	690	5	0.8	10	30	10	11	2	3		5	0	69	-15	-13	-11	-14	-10	0.3	-11	0.3	-15	0.6	0.2	0.3	0.3
7	3	12	1056	5	0.8	10	40	12	13	2	2		5	0	88	-15	-13	-11	-14	-10	0.2	-11	0.2	-16	0.5	0.2	0.3	0.4
7	3	20	2180	5	0.8	10	40	14	15	2	2		5	0	109	-18	-19	-15	-19	-15	0.3	-14	0.4	-18	0.6	0.3	0.3	0.5
7	3	23	2507	5	0.8	10	40	14	15	2	2		5	0	109	-15	-13	-10	-14	-10	0.2	-10	0.3	-15	0.5	0.2	0.3	0.4
7	3	28	2492	5	0.8	10	40	12	12	2	3		8	0	89	-15	-13	-11	-14	-11	0.3	-11	0.3	-16	0.5	0.2	0.4	0.3
7	3	32	2496	5	0.8	10	35	12	12	2	3		5	0	78	-15	-12	-11	-13	-9	0.3	-10	0.3	-15	0.4	0.2	0.3	0.4
7	3	32	2496	5	0.8	10	30	10	12	2	4		5	0	78	-15	-12	-11	-14	-10	0.3	-11	0.3	-15	0.5	0.2	0.4	0.3
7	3	43	4257	5	0.8	10	35	12	14	2	2		5	0	99	-16	-14	-11	-15	-11	0.3	-12	0.3	-16	0.6	0.1	0.4	0.2
7	3	96	11520	5	0.8	10	35	16	16	2	2	3	8	0	120	-15	-12	-11	-13	-10	0.3	-11	0.4	-15	0.5	0.2	0.3	0.4
8	1	5	390	10	0.8	10	25	10	12	2	3	1	6	0	78	-17	-17	-15	-20	-14	0.2	-16	0.3	-17	0.7	0.3	0.3	0.4
8	3	23	2277	5	0.8	10	40	14	14	2	2		7	0	99	-15	-13	-11	-14	-10	0.3	-11	0.4	-16	0.4	0.2	0.4	0.4
8	3	27	2673	5	0.8	10	40	12	14	2	3		8	0	99	-15	-13	-11	-14	-11	0.3	-11	0.5	-15	0.5	0.2	0.3	0.5
8	3	35	3815	5	0.8	10	40	14	15	2	2		6	0	109	-16	-14	-11	-14	-12	0.4	-12	0.5	-16	0.5	0.4	0.4	0.5
8	3	42	3696	5	0.8	10	40	12	13	2	2		5	0	88	-15	-13	-11	-14	-10	0.2	-11	0.2	-16	0.5	0.2	0.3	0.3
8	3	43	4257	5	0.8	10	35	12	14	2	4		5	0	99	-17	-15	-13	-18	-11	0.3	-13	0.3	-17	0.6	0.2	0.4	0.3
8	3	73	10950	5	0.8	10	35	16	17	2	2	4	6	0	150	-15	-13	-11	-14	-10	0.3	-11	0.5	-15	0.6	0.2	0.3	0.5
9	3	21	2079	5	0.8	10	35	12	14	2	4		5	0	99	-17	-14	-12	-16	-11	0.3	-13	0.3	-17	0.5	0.1	0.4	0.2
9	3	31	2418	5	0.8	10	35	10	12	2	3		8	0	78	-16	-14	-12	-15	-11	0.3	-12	0.4	-16	0.6	0.2	0.4	0.3
9	3	35	2730	5	0.8	10	30	10	12	2	3		5	0	78	-19	-17	-15	-20	-14	0.3	-16	0.2	-19	0.6	0.2	0.3	0.3
9	1	48	4752	10	0.8	10	35	12	14	2	2		5	0	99	-16	-15	-12	-15	-12	0.3	-12	0.4	-17	0.5	0.4	0.4	0.5
9	3	58	6322	5	0.8	10	40	14	15	2	3		6	0	109	-15	-12	-11	-13	-10	0.2	-10	0.3	-15	0.5	0.2	0.3	0.4
10	3	7	616	5	0.8	10	30	12	13	2	2		5	0	88	-15	-13	-11	-14	-11	0.2	-11	0.3	-15	0.6	0.2	0.3	0.3
10	3	12	1188	5	0.8	10	35	12	14	2	2		5	0	99	-16	-14	-12	-15	-12	0.3	-12	0.4	-17	0.5	0.4	0.4	0.5
10	3	32	3488	5	0.8	10	40	14	15	2	3		6	0	109	-16	-13	-11	-14	-11	0.3	-11	0.4	-16	0.5	0.2	0.4	0.4
10	3	34	2346	5	0.8	10	30	10	11	2	3		7	0	69	-14	-12	-10	-13	-10	0.2	-10	0.3	-15	0.5	0.2	0.3	0.3
10	3	36	3924	5	0.8	10	40	14	15	2	2		5	0	109	-15	-13	-11	-13	-10	0.2	-10	0.3	-15	0.5	0.2	0.3	0.4
10	3	43	4343	10	0.8	10	45	12	14	3	2		8	0	101	-15	-12	-11	-13	-10	0.2	-10	0.3	-16	0.5	0.2	0.2	0.4
11	3	24	2112	5	0.8	10	35	12	13	2	4		5	0	88	-15	-12	-10	-13	-9	0.3	-11	0.3	-15	0.5	0.2	0.3	0.3
11	1	57	4446	10	0.8	10	35	12	12	2	2		5	0	78	-16	-14	-12	-15	-12	0.3	-11	0.5	-16	0.5	0.4	0.5	0.5
12	3	15	1035	5	0.8	10	30	10	11	2	4		5	0	69	-16	-16	-12	-16	-12	0.3	-12	0.5	-17	0.5	0.4	0.3	0.5
12	3	33	2904	5	0.8	10	35	12	13	2	2		5	0	88	-16	-13	-11	-14	-11	0.3	-11	0.4	-16	0.5	0.2	0.3	0.4
12	1	34	3366	10	0.8	10	35	12	14	2	2		5	0	99	-16	-15	-12	-15	-12	0.3	-12	0.5	-16	0.6	0.5	0.4	0.6
12	2	46	3588	10	0.8	10	30	10	12	2	4	3	8	0	78	-16	-14	-12	-15	-13	0.4	-12	0.5	-16	0.7	0.5	0.5	0.5
13	3	23	2507	5	0.8	10	35	14	15	2	2		8	0	109	-15	-13	-11	-14	-10	0.2	-10	0.2	-16	0.5	0.2	0.3	0.3
13	3	28	2464	5	0.8	10	35	12	13	2	2		5	0	88	-16	-13	-11	-14	-11	0.3	-12	0.4	-16	0.4	0.2	0.4	0.4
14	3	43	4687	5	0.8	10	40	14	15	2	2		5	0	109	-15	-12	-11	-13	-10	0.2	-11	0.3	-15	0.5	0.2	0.2	0.3
16	2	9	702	10	0.8	10	25	10	12	2	4	1	5	0	78	-14	-14	-11	-15	-12	0.2	-12	0.4	-15	0.6	0.3	0.4	0.4
16	3	21	1848	5	0.8	10	40	12	13	2	3		7	0	88	-16	-13	-11	-14	-11	0.3	-12	0.4	-16	0.5	0.1	0.3	0.4
16	3	23	2277	5	0.8	10	40	12	14	2	3		5	0	99	-16	-14	-11	-14	-12	0.2	-12	0.4	-16	0.6	0.3	0.3	0.5
17	2	11	385	10	0.8	10	20	6	7	1	3	3	6	0	35	-16	-14	-12	-16	-12	0.4	-12	0.5	-16	0.7	0.5	0.5	0.5
19	3	12	1188	5	0.8	10	40	12	14	2	2		8	0	99	-16	-13	-11	-14	-10	0.3	-11	0.3	-15	0.4	0.2	0.4	0.3
3	3	50	4450	5	0.9	10	30	10	12	2	3		6	0	89	-14	-12	-11	-13	-10	0.3	-10	0.3	-15	0.5	0.2	0.4	0.3
8	3	24	2712	5	0.9	10	40	12	14	2	2		5	0	113	-15	-12	-11	-13	-10	0.2	-10	0.3	-15	0.5	0.2	0.3	0.4

## Sheet: Birch (Betulaplatyphylla Suk)
canopy density	mean age (year)	HV （dB）		canopy density	mean DBH (cm)	HV （dB）		canopy density	mean height (m)	HV （dB）
0.2	5	-14.5		0.2	2	-16.1111		0.2	3	-17.4286
0.2	8	-19		0.2	4	-17		0.2	4	-15.7143
0.2	10	-16.8		0.2	6	-17.1765		0.2	5	-17.75
0.2	15	-17.25		0.2	7	-13		0.2	6	-17.6
0.2	20	-17.2		0.2	8	-16.85		0.2	7	-15.8889
0.2	25	-16.5882		0.2	10	-17.0476		0.2	8	-16.3571
0.2	30	-16.85		0.2	12	-15.8889		0.2	9	-17.4
0.2	35	-15.3333						0.2	10	-16.7778
0.2	40	-18.3333						0.2	11	-19.25
				2.91502e-06		0.0428145		0.2	12	-15.875
								0.2	13	-13
								0.2	14	-15
								0.2	15	-16.75
canopy density	mean age (year)	HV （dB）		canopy density	mean DBH (cm)	HV （dB）		canopy density	mean height (m)	HV （dB）
0.3	3	-17		0.3	2	-16.2		0.3	3	-17.3333
0.3	5	-15.2		0.3	3	-17		0.3	4	-15.625
0.3	6	-19		0.3	4	-16		0.3	5	-17.25
0.3	10	-16.6154		0.3	5	-14.5		0.3	6	-15.8889
0.3	15	-15.2		0.3	6	-16.6111		0.3	7	-15.4
0.3	20	-17.0455		0.3	7	-14.5		0.3	8	-16.3158
0.3	25	-15.875		0.3	8	-16.3462		0.3	9	-15.7143
0.3	30	-16.0625		0.3	9	-13.3333		0.3	10	-17.375
0.3	35	-16		0.3	10	-16.6154		0.3	11	-15.6
0.3	40	-15		0.3	11	-15		0.3	12	-16.25
0.3	50	-20		0.3	12	-16		0.3	13	-16
				0.3	13	-14		0.3	14	-13.5
				0.3	14	-14		0.3	15	-14
				0.3	16	-16.5
				0.3	18	-13
canopy density	mean age (year)	HV （dB）		canopy density	mean DBH (cm)	HV （dB）		canopy density	mean height (m)	HV （dB）
0.4	5	-17		0.4	2	-17.5		0.4	3	-16
0.4	8	-14		0.4	3	-20		0.2	4	-18.8333
0.4	10	-18.5556		0.4	4	-17.8333		0.2	5	-18.75
0.4	15	-17.0909		0.4	6	-16.9		0.2	6	-17.1111
0.4	20	-16.5		0.4	7	-13.6667		0.2	7	-15.7692
0.4	25	-15.9722		0.4	8	-16.3404		0.2	8	-15.6957
0.4	30	-15.9545		0.4	10	-16.04		0.2	9	-16.6667
0.4	35	-14.5		0.4	11	-17		0.2	10	-16.5714
0.4	40	-15		0.4	12	-15		0.2	11	-15.8
				0.4	13	-14		0.2	12	-15.4167
				0.4	14	-14		0.2	13	-13.6667
				0.4	16	-13.25		0.2	14	-15
								0.2	15	-13
								0.2	16	-13
canopy density	mean age (year)	HV （dB）		canopy density	mean DBH (cm)	HV （dB）		canopy density	mean height (m)	HV （dB）
0.5	10	-17		0.5	2	-21		0.5	4	-21
0.5	15	-15.6667		0.5	5	-19		0.5	5	-19
0.5	20	-15.3611		0.5	6	-16.3478		0.5	6	-15
0.5	25	-16.5417		0.5	7	-14		0.5	7	-16.1
0.5	30	-14.5833		0.5	8	-16.1778		0.5	8	-15.3333
0.5	35	-14.4444		0.5	9	-12		0.5	9	-16.75
0.5	40	-16.25		0.5	10	-15.4118		0.5	10	-15.7436
0.5	60	-14		0.5	11	-13.5455		0.5	11	-15.9444
				0.5	12	-14.5714		0.5	12	-14.4545
				0.5	13	-13.8333		0.5	13	-13.9167
				0.5	14	-14.2		0.5	14	-13.8
				0.5	16	-13		0.5	15	-13
				0.5	20	-14
canopy density	mean age (year)	HV （dB）		canopy density	mean DBH (cm)	HV （dB）		canopy density	mean height (m)	HV （dB）
0.6	5	-20		0.6	2	-22		0.6	3	-21.3333
0.6	10	-22		0.6	3	-20		0.6	6	-20
0.6	15	-13.7778		0.6	6	-15		0.6	7	-15.6
0.6	20	-14.8		0.6	7	-14		0.6	8	-14.3
0.6	25	-16.48		0.6	8	-16		0.6	9	-16.7857
0.6	30	-14.4746		0.6	9	-14		0.6	10	-14.25
0.6	35	-15.1923		0.6	10	-15.8846		0.6	11	-16.0625
0.6	40	-13.9167		0.6	11	-13.25		0.6	12	-15.3871
0.6	45	-14		0.6	12	-15.1944		0.6	13	-13.9286
				0.6	13	-14.5556		0.6	14	-14.0833
				0.6	14	-12.9545		0.6	15	-13.2
				0.6	16	-12.8		0.6	16	-13
				0.6	18	-13		0.6	17	-12.5
canopy density	mean age (year)	HV （dB）		canopy density	mean DBH (cm)	HV （dB）		canopy density	mean height (m)	HV （dB）
0.7	15	-16		0.7	6	-15.6667		0.7	6	-14
0.7	20	-16.5		0.7	8	-16.0952		0.7	7	-15.75
0.7	25	-15.65		0.7	10	-15.7692		0.7	8	-16.75
0.7	30	-14.3333		0.7	12	-14.0526		0.7	9	-16.25
0.7	35	-13.4444		0.7	13	-12.5		0.7	10	-15.3333
0.7	40	-13.5455		0.7	14	-13.0769		0.7	11	-17.5
0.7	45	-13		0.7	15	-12.5		0.7	12	-14.5714
				0.7	16	-12.9167		0.7	13	-12.85
								0.7	14	-13.6923
								0.7	15	-13.3636
								0.7	16	-12.8
								0.7	17	-13
